1     **A B cell actomyosin arc network couples integrin co-stimulation to mechanical**  
2                     **force-dependent immune synapse formation**

3     Jia C. Wang<sup>1</sup>, Yang-In Yim<sup>1</sup>, Xufeng Wu<sup>2</sup>, Valentin Jaumouillé<sup>1</sup>, Clare M. Waterman<sup>1</sup>,  
4                     John H. Kehrl<sup>3</sup>, and John A. Hammer<sup>1,4</sup>

5         <sup>1</sup> Cell and Developmental Biology Center, National Heart, Lung and Blood Institute,  
6                     National Institutes of Health, Bethesda MD 20892

7         <sup>2</sup>Light Microscopy Core, National Heart, Lung and Blood Institute, National Institutes of  
8                     Health, Bethesda MD 20892

9         <sup>3</sup>B Cell Molecular Immunology Section, National Institute of Allergy and Infectious  
10                     Disease, National Institutes of Health, Bethesda MD 20892

11                     <sup>4</sup>Author for correspondence: [hammerj@nhlbi.nih.gov](mailto:hammerj@nhlbi.nih.gov)

12

13

14

## Abstract

15 B-cell activation and immune synapse (IS) formation with membrane-bound  
16 antigens are actin-dependent processes that scale positively with the strength of  
17 antigen-induced signals. Importantly, ligating the B-cell integrin, LFA-1, with ICAM-1  
18 promotes IS formation when antigen is limiting. Whether the actin cytoskeleton plays a  
19 specific role in integrin-dependent IS formation is unknown. Here we show using super-  
20 resolution imaging of primary B cells that LFA-1: ICAM-1 interactions promote the  
21 formation of an actomyosin network that dominates the B-cell IS. This network is  
22 created by the formin mDia1, organized into concentric, contractile arcs by myosin 2A,  
23 and flows inward at the same rate as B-cell receptor (BCR): antigen clusters.  
24 Consistently, individual BCR microclusters are swept inward by individual actomyosin  
25 arcs. Under conditions where integrin is required for synapse formation, inhibiting  
26 myosin impairs synapse formation, as evidenced by reduced antigen centralization,  
27 diminished BCR signaling, and defective signaling protein distribution at the synapse.  
28 Together, these results argue that a contractile actomyosin arc network plays a key role  
29 in the mechanism by which LFA-1 co-stimulation promotes B-cell activation and IS  
30 formation.

31

32

## Introduction

33 BCR engagement with cognate antigen triggers striking changes in B cell  
34 physiology that promote B cell activation, immune synapse (IS) formation, and B cell  
35 effector functions (1-3). These changes include dramatic increases in actin filament  
36 assembly and dynamics that are thought to drive IS formation in B cells engaged with  
37 membrane-bound antigen (1-4). For B cells *in vivo*, this usually involves interactions  
38 with antigen bound to the surface of an antigen-presenting cell (APC) (4-6), although  
39 activating surfaces such as antigen-coated glass and planar lipid bilayers containing  
40 freely-diffusing antigen are used to mimic these *in vivo* interactions. IS formation in  
41 these contexts is initiated by the formation of a radially-symmetric, Arp2/3 complex-  
42 dependent branched actin network at the outer edge of the IS (i.e. in the distal  
43 supramolecular activation cluster or dSMAC) (7, 8). This lamellipodia-like actin network  
44 drives the spreading of the B cell across the antigen-coated surface, thereby promoting  
45 BCR: antigen interactions (3, 9). Once the B cell is fully spread, the continued  
46 polymerization of branched actin at the outer edge of the dSMAC generates a  
47 centripetal or retrograde flow of actin that drives the movement of BCR: antigen clusters  
48 (10-12) towards the center of the synapse (i.e. to the central SMAC or cSMAC) (8, 13).  
49 This centripetal actin flow, combined with an overall contraction of the B cell, is thought  
50 to be responsible for the transport of BCR: antigen clusters to the center of the maturing  
51 synapse (13). Importantly, this process of antigen centralization is required for robust  
52 BCR signaling (3, 11, 14), and is thought to be a prerequisite for antigen internalization  
53 by follicular B cells (15-17).

54 Antigen-induced IS formation scales with the strength of antigen-induced signals  
55 such that IS formation and B cell activation are attenuated when membrane-bound  
56 antigen binds the BCR weakly or is presented at low density. Importantly, co-stimulatory  
57 signals can promote IS formation and B cell activation under both of these conditions  
58 (18, 19). Seminal work from Carrasco and colleagues showed that the B-cell integrin  
59 LFA-1, which binds the adhesion molecule ICAM-1 present on the surface of APCs (20,  
60 21), serves as one such co-stimulatory signal (18). This conclusion was based on four  
61 key observations. First, B cells responded robustly to higher affinity membrane-bound  
62 antigens presented at high density whether or not ICAM-1 was present on the  
63 membrane. Second, the robust activation of B cells in response to antigens of all  
64 affinities increasingly required ICAM-1 in the membrane as the density of the antigen  
65 was lowered. Third, this co-stimulatory effect was most dramatic for weaker antigens.  
66 Finally, this latter effect was not observed in B cells lacking LFA-1. With regard to the  
67 underlying mechanism, IRM imaging suggested that LFA-1: ICAM-1 interactions, which  
68 were shown to concentrate in the medial portion of the synapse (i.e. the peripheral  
69 SMAC or pSMAC), lower the threshold for B cell activation by enhancing cell adhesion.

70           While the actin cytoskeleton clearly plays a central role in driving IS formation,  
71 whether it plays a specific role in integrin-dependent IS formation is unknown. This is an  
72 important question, as most B cell interactions with professional APCs presenting  
73 cognate antigen involve integrin ligation. Relevant to this question, the dendritic actin  
74 network occupying the outer dSMAC ring, which is thought to be the main driver of IS  
75 formation, has been observed primarily in cells that received antigen stimulation alone,  
76 and almost exclusively in immortalized B cell lines (13, 22-25). It is not known,  
77 therefore, whether integrin-co-stimulation alters the organization and/or dynamics of  
78 actin at the B-cell IS. Moreover, we are only just beginning to elucidate the organization  
79 and dynamics of synaptic actin networks formed by primary B cells. Here we show that  
80 LFA-1: ICAM-1 interactions in primary B cells stimulate the formation of a contractile  
81 actomyosin arc network that occupies the pSMAC portion of the synapse. This  
82 actomyosin network represents the major actin structure at the IS of primary B cells  
83 receiving integrin co-stimulation, and its dynamics drive antigen centralization by  
84 sweeping antigen centripetally. Importantly, under conditions of limiting antigen, where  
85 integrin co-stimulation is required for IS formation, blocking the contractility of this  
86 pSMAC network inhibits IS formation and BCR signaling. Finally, we show that germinal  
87 center (GC) B cells can also create this actomyosin structure, suggesting that it  
88 contributes to the process of antibody affinity maturation. Together, our data  
89 demonstrate that a contractile actomyosin arc network created downstream of integrin  
90 ligation plays a major role in the mechanism by which integrin co-stimulation promotes  
91 B cell activation and IS formation when antigen is limiting. Importantly, these findings  
92 highlight the need for including integrin co-stimulation when examining the role of actin  
93 during B cell activation, especially under physiologically relevant conditions.

94

95

96

97



98

## Results

### 99 **Integrin co-stimulation promotes the formation of an actin arc network in the** 100 **pSMAC**

101 To investigate the possibility that LFA-1 ligation might promote B cell activation  
102 by triggering a significant change in synaptic actin organization, we imaged F-actin at  
103 ISs formed by primary mouse B cells on glass surfaces coated with either anti-IgM or  
104 anti-IgM plus ICAM-1. F-actin was visualized using GFP-F-Tractin, a dynamic reporter  
105 for F-actin (26, 27), and two super-resolution imaging modalities: Airyscan (xy resolution  
106 ~140 nm) and total internal reflection-structured illumination (TIRF-SIM; xy resolution  
107 ~100 nm). Individual video frames of anti-IgM-engaged B cells using both imaging  
108 modalities (Fig. 1A, B), together with the corresponding movies (Movies 1A and 1B),  
109 revealed a thin, bright, highly-dynamic outer rim of F-actin (white arrows in Fig. 1A, B)  
110 that likely corresponds to the branched actin network comprising the dSMAC (13, 22,  
111 25). Both modalities (but especially TIRF-SIM) showed that the F-actin present inside  
112 this outer dSMAC rim is composed of a highly disorganized mixture of short actin  
113 filaments/fibers and actin foci (blue brackets in Fig. 1A, B). In sharp contrast, individual  
114 video frames of anti-IgM+ICAM-1-engaged B cells using both modalities (Fig. 1C, D),  
115 together with the corresponding movies (Movies 2A and 2B), showed a highly organized  
116 network inside the outer dSMAC rim (i.e. in the pSMAC) that is comprised of concentric  
117 actin arcs (blue brackets and red arrows in Fig. 1C, D). The difference in synaptic actin  
118 organization between anti-IgM-engaged B cells and anti-IgM+ICAM-1-engaged B cells  
119 is very evident in enlarged TIRF-SIM images. While it is challenging to define SMAC  
120 boundaries and any pattern of F-actin organization in the pSMAC of B cells engaged  
121 with anti-IgM alone (Fig. 1E1, E2), SMAC boundaries and pSMAC F-actin organization  
122 are both very distinct in B cells engaged using anti-IgM+ICAM-1 (Fig. 1F1, F2).  
123 Consistently, scoring B cells for the presence of a discernable actin arc network showed  
124 that the addition of ICAM-1 increases the percentage of such cells from ~30% to ~70%  
125 (Fig. 1G). Moreover, dynamic imaging showed that the arcs in cells engaged with anti-  
126 IgM alone are typically sparse and transient (Movies 1A and 1B), while those in cells  
127 engaged with both anti-IgM and ICAM-1 are dense and persistent (Movies 2A and 2B).  
128 Finally, measuring the percentage of total synaptic F-actin content within each SMAC  
129 (Fig. 1H), and the percentage of total IS footprint occupied by each SMAC (Fig. 1I),  
130 showed that the actin arc-containing pSMAC comprises the major actin network at the  
131 IS of primary B cells engaged using both anti-IgM and ICAM-1. Together, these results  
132 demonstrate that LFA-1 co-stimulation promotes the formation of a pSMAC actin arc  
133 network that dominates the B cell IS.

### 134 **Linear actin filaments generated by the formin mDia1 at the outer edge of the** 135 **synapse give rise to the pSMAC actin arc network**

136 We next sought to define the origin of the actin arcs that comprise the pSMAC of  
137 B cells stimulated using both anti-IgM and ICAM-1. Primary B cells stimulated in this  
138 way exhibit small, actin-rich surface spikes at the outer synapse edge (Fig. 2A).  
139 Importantly, magnified images revealed that the actin within these spikes continues into  
140 the cytoplasm in the form of linear actin filaments (Fig. 2B1, B2). Moreover, tracing  
141 these linear actin filaments showed that they are contiguous with the pSMAC actin arcs  
142 (Fig. 2C1, C2; Movies 3A and 3B). These results argue that linear actin filaments  
143 nucleated at the plasma membrane at the outer edge of the synapse give rise to the  
144 actin arcs populating the pSMAC. While these results do not identify the specific  
145 nucleator involved, they do point to it being a member of the formin family based on the  
146 fact that the actin being made is linear and nucleated at the plasma membrane (28, 29).  
147 Consistent with this conjecture, and with the fact that formins incorporate fluorescent  
148 protein-labelled actin monomer into filaments poorly (26, 27, 30), we did not see  
149 fluorescent actin arcs in B cells expressing mEOS-labeled G-actin (Movie 4).

150 To test if a formin is indeed responsible for creating the pSMAC actin arc  
151 network, we used the pan-formin inhibitor SMIFH2 (31). Fig. 2D1 and 2D2, together with  
152 the line scan in Fig. 2E, show that the pSMAC actin arcs present in a representative  
153 primary B cell immediately before SMIFH1 addition (blue trace) had largely disappeared  
154 6 minutes after adding SMIFH2 (red trace). Given recent concerns about the specificity  
155 of SMIFH2 (32), we used three different miRNAs to knock down the formin mDia1 in the  
156 lymphoma B cell line A20 (Fig. S1), which also forms pSMAC actin arcs when  
157 stimulated using anti-IgG+ICAM-1 (Fig. 1J1, J2; Movie 5A). mDia1 was chosen as the  
158 miRNA target as it is highly expressed in B cells (Immgen Database) and is largely  
159 responsible for making linear actin filaments in T cells (27). Compared to control A20 B  
160 cells (Fig. 2F1), representative B cells expressing each of the three miRNAs (Fig. 2F2-  
161 F4) were largely devoid of actin arcs. This difference was supported by quantitating the  
162 ratio of pSMAC to dSMAC F-actin (Fig. 2G), as well as the amount of F-actin in the  
163 pSMAC (Fig. 2H). Together, these results argue that the pSMAC actin arcs are indeed  
164 created by a formin, and that the formin mDia1 plays a major role.

165 To provide one final piece of evidence that the arcs are created by a formin, we  
166 imaged A20 B cells following the addition of the Arp2/3 inhibitor CK-666. The rationale  
167 for this experiment lies in the recent revelation that the two major consumers of actin  
168 monomer in cells, the Arp2/3 complex and formins, are always competing for a limiting  
169 pool of actin monomer (33-36). One consequence of this competition is that when one  
170 of these nucleators is inhibited, the actin structures created by the other nucleator get  
171 more robust because that nucleator now gets more monomer. For example, inhibiting  
172 the Arp2/3 complex promotes the formation of formin-dependent actin networks in both  
173 yeast and vertebrate cells (27, 33-36). Given this, and assuming that the arcs in B cells  
174 are formin-generated, then inhibiting the Arp2/3 complex in B cells should lead not only

175 to a diminution of the branched actin network in the dSMAC, but also to an amplification  
176 of the arc network in the pSMAC. Consistently, Figure S2A1/A2 (before CK-666  
177 addition) and Figure S2A3/A4 (after CK-666 addition) together show that CK-666  
178 addition leads not only to a reduction in the size of the dSMAC (red brackets), but also  
179 to an increase in arc content in the pSMAC (blue brackets). These changes were  
180 supported by measuring the percentage of total synaptic F-actin content residing within  
181 each SMAC (Fig. S2B), which revealed a significant shift away from dSMAC F-actin and  
182 toward pSMAC F-actin following CK-666 treatment. This shift was also reflected in  
183 measurements of total pSMAC F-actin content (Fig. S2C), the ratio of pSMAC to  
184 cSMAC F-actin content (Fig. S2D), and the ratio of pSMAC to cSMAC area (Fig. S2E).  
185 Taken together, these data argue strongly that linear actin filaments generated by the  
186 formin mDia1 at the outer edge of the synapse give rise to the pSMAC actin arc  
187 network.

### 188 **Myosin 2A co-localizes with the actin arcs**

189 Having established that ICAM-1 co-stimulation promotes the formin-dependent  
190 formation of actin arcs in the pSMAC, we asked how these arcs are organized into  
191 concentric structures. Formin-derived linear actin filaments are commonly organized  
192 into well-defined structures such as stress fibers, transverse arcs, and the contractile  
193 ring in dividing cells by bipolar filaments of the actin-based motor protein myosin 2 (37-  
194 39). We decided, therefore, to test whether myosin 2 co-localizes with the actin arcs and  
195 is required for their concentric organization.

196 To define the localization and dynamics of myosin 2 at the B cell IS, we used  
197 primary B cells isolated from a mouse in which GFP had been knocked into the N-  
198 terminus of the myosin 2A (M2A) heavy chain gene (40), as M2A is the only myosin 2  
199 isoform expressed in B cells (Immgen Database). Individual video frames of these cells  
200 following transfection with Td-Tomato-F-Tractin and attachment to coverslips coated  
201 with anti-IgM and ICAM-1 revealed a dramatic co-localization between M2A and the  
202 actin arcs in the pSMAC (Fig. 3A1-A3; Movie 6). Magnified TIRF-SIM images show that  
203 the myosin signals align with actin arcs in a periodic fashion (Fig. 3A4) that resembles  
204 other myosin 2-rich, linear actin structures like stress fibers and the contractile ring (41).  
205 Moreover, these myosin signals exhibit the SIM signature for M2A bipolar filaments  
206 when M2A is GFP-labeled at its N-terminus (42), which is a pair of GFP puncta spaced  
207 ~300 nm apart (Fig. 3A5;  $304 \pm 32$  nm;  $n = 230$  filaments from 12 cells). The presence  
208 of M2A filaments in the medial portion of the synapse was also evident in primary B  
209 cells isolated from a mouse in which mCherry had been knocked into the N-terminus of  
210 M2A (Fig. S3A), in primary B cells that we genome edited using CRISPR to place GFP  
211 at the N-terminus of M2A (Fig. S3B), and in A20 B cells that we genome edited using  
212 CRISPR to place mScarlet1 at the N-terminus of M2A and then transfected with GFP-F-  
213 Tractin (Fig. S3C1-C3; Movie 5B). Finally, 3D-SIM images of A20 B cells that were fixed

214 and stained for M2A and actin showed that endogenous M2A also co-localizes with the  
215 actin arcs (Fig. S3D1-D3; note that the signature for M2A filaments using this antibody,  
216 which recognizes the C-terminus of M2A, is a single fluorescent punctum that  
217 corresponds to the center of an individual M2A filament (41, 43)). The extent of this  
218 colocalization was even clearer in enlarged images of immunostained cells (Fig. S3E1-  
219 E3), where line scans showed endogenous M2A coinciding with actin arcs (Fig. S3F).  
220 Together, these results show that the actin arc network in primary B cells receiving  
221 ICAM-1 co-stimulation is in fact an actomyosin arc network.

222 To gain insight into how the arcs become decorated with M2A filaments, we  
223 examined time lapse TIRF-SIM images of GFP-M2A knockin primary B cells expressing  
224 Td-Tomato F-Tractin. Individual video frames (Fig. 3B1-B6), as well as the  
225 corresponding movie (Movie 7), show that bipolar filaments of M2A begin to appear  
226 near the dSMAC: pSMAC boundary in association with the linear actin  
227 filaments/bundles exiting the dSMAC (white, yellow and fuchsia arrowheads mark such  
228 myosin filaments at time 0s in Fig. 3B1). As time progresses, these filaments move  
229 centripetally and undergo expansion into filament clusters (Fig. 3B1-B6; see also Movie  
230 7). This expansion, in which individual myosin filaments expand into a small cluster of  
231 filaments, is presumably driven by the same sequential amplification pathway described  
232 previously for M2A filament assembly in Hela cells (42). Finally, the myosin filaments in  
233 these clusters begin to align with the arcs forming at the outer edge of the pSMAC,  
234 which then merge with the larger actomyosin arc network in the pSMAC (Fig. 3B1-B6).  
235 As all this is happening, new myosin filaments keep appearing near the dSMAC:  
236 pSMAC boundary to repeat the process (Fig. 3B2-B6; follow the blue, green and purple  
237 arrowheads).

238 Given that ICAM-1 co-stimulation promotes the formation of actin arcs, and that  
239 the arcs recruit M2A, ICAM-1 co-stimulation should also result in an increase in the  
240 amount of M2A at the IS. Consistently, primary GFP-M2A knockin B cells receiving both  
241 anti-IgM and ICAM-1 stimulation exhibited a greater amount of synaptic M2A than B  
242 cells receiving only anti-IgM stimulation (Fig. 3C-3E). Of note, this difference remained  
243 significant even after normalizing the M2A fluorescence for a small difference in the  
244 average cell-spread area under these two conditions (Fig. S3G1, G2).

### 245 **Myosin 2A contractility is required for the concentric organization of the actin** 246 **arcs and for integrin-dependent traction force**

247 The organization of formin-generated linear actin filaments into well-defined  
248 structures is typically driven by the contractility of myosin 2 filaments (37, 38).  
249 Therefore, we asked if M2A contractility is required for the concentric organization of the  
250 pSMAC actin arcs by treating cells with para-nitroblebbistatin (pnBB), a blue light-  
251 insensitive version of the cell-permeable, small molecule myosin 2 inhibitor blebbistatin

252 (BB) that blocks myosin 2-based contractility by locking the myosin in its weak actin  
253 binding state (44). While control, DMSO-treated cells exhibited concentric actin arcs in  
254 their pSMAC as expected (Fig. 3F), cells treated with 25  $\mu$ M pnBB displayed highly-  
255 disorganized, mesh-like actin arrays in their pSMAC (Fig. 3G). To quantify this defect in  
256 pSMAC actin organization, we used FibrilTool (45) to measure the anisotropy of actin  
257 filaments in the pSMAC. This tool measures how well structures of interest (here actin  
258 filaments) within a given region of interest (ROI; here the pSMAC) are arranged in  
259 parallel (anisotropy values range from 0 when the orientation of the structures is  
260 completely random to 1.0 when all of the structures are perfectly aligned/parallel to each  
261 other). To measure actin anisotropy in the radially-symmetric IS, we “linearized”  
262 pSMACs by dividing them into 10-12 trapezoid-shaped ROIs of similar size (Fig. S3H).  
263 As anticipated, the anisotropy values revealed a dramatic shift towards more  
264 disorganized pSMAC actin when B cells are treated with pnBB (Fig. 3H). Together,  
265 these results demonstrate that M2A contractility is indeed required for the concentric  
266 organization of the pSMAC actin arcs.

267 We used traction force microscopy in combination with pnBB to ask if integrin-  
268 dependent traction forces that B cells exert on a deformable substrate require M2A  
269 contractility. As expected (46, 47), B cells engaged with substrate coated with anti-IgM  
270 and ICAM-1 generated significantly more traction force than B cells engaged with  
271 substrate coated with anti-IgM alone (Fig. S4A1, A2, B1, B2, D). Importantly, ICAM-1-  
272 dependent traction forces were completely abrogated by pre-treating the cells with  
273 pnBB (Fig. S4C1, C2, D), indicating that the generation of integrin-dependent traction  
274 forces requires M2A contractility. This requirement likely reflects pulling forces exerted  
275 by M2A on the substrate through LFA-1: ICAM-1 pairs, combined with the increase in  
276 M2A content at the synapse caused by ligating LFA-1 with ICAM-1, and the contribution  
277 that M2A-dependent pulling forces make in keeping LFA-1 in its open, active  
278 conformation (48-50). These results, together with the fact that integrin clusters are  
279 known to accumulate in the pSMAC portion of the B cell IS (18, 19), suggest a feed-  
280 forward relationship where integrin ligation promotes the formation of pSMAC  
281 actomyosin arcs, and the contractile forces exerted by these actomyosin arcs promote  
282 further integrin activation and robust adhesion in the pSMAC.

### 283 **The actomyosin arc network in the pSMAC exhibits centripetal flow**

284 Inward flows of cortical actin networks are thought to drive the transport of  
285 antigen receptor clusters to the center of maturing synapses in both T cells and B cells  
286 ((7, 36, 50); although see (51, 52)). For B cells, the clearest example of this to date is  
287 the demonstration that the centripetal flow of the branched actin network comprising the  
288 dSMAC propels BCR: antigen clusters towards the cSMAC (13). As a prelude to asking  
289 whether the actomyosin arcs comprising the pSMAC also contribute to antigen  
290 centralization, we asked if this contractile network exhibits centripetal flow. Kymograph



291 analyses of actin flow across synapses made by primary B cells expressing GFP-F-  
292 Tractin showed that their pSMAC actomyosin arc network indeed flows centripetally at  
293  $1.07 \pm 0.07 \mu\text{m}/\text{min}$ , or about one third the rate of centripetal actin flow in the dSMAC  
294 ( $2.89 \pm 0.18 \mu\text{m}/\text{min}$ ) (Fig. S5A1-A3). Similar results were obtained for A20 B cells  
295 (pSMAC rate:  $0.97 \pm 0.13 \mu\text{m}/\text{min}$ ; dSMAC rate:  $3.16 \pm 0.35 \mu\text{m}/\text{min}$ ) (Fig. S5B1-B3).  
296 Together, these results indicate that the actomyosin arcs could contribute along with the  
297 branched actin network in the dSMAC to the inward transport of BCR: antigen clusters.

### 298 **Actomyosin arcs contribute to antigen centralization by sweeping BCR: antigen** 299 **clusters inward**

300 We used planar lipid bilayers (PLBs) to determine if the actomyosin arcs do in  
301 fact contribute to antigen centralization. As expected, primary B cells expressing GFP-  
302 F-Tractin readily formed actin arcs when PLBs contained both anti-IgM and ICAM-1  
303 (Movie 8A), but not when they contained anti-IgM alone (Movie 8B). Also as expected,  
304 primary B cells engaged with PLBs containing fluorescent anti-IgM (red) and unlabeled  
305 ICAM-1 yielded mature synapses in which concentric actin arcs surrounded antigen  
306 accumulated in the cSMAC (Fig. 4A1-A3, white arrows). To obtain a holistic view of  
307 antigen centralization, we imaged antigen clusters in the dSMAC and pSMAC of primary  
308 B cells over time with the aim of correlating their rates of centripetal transport with the  
309 distinct rates of centripetal actin flow exhibited by these two IS zones (Movie 9).  
310 Tracking of single antigen microclusters showed that they moved inward at  $2.36 \pm 1.1$   
311  $\mu\text{m}/\text{min}$  and  $1.03 \pm 0.3 \mu\text{m}/\text{min}$  across the dSMAC (red tracks) and pSMAC (green  
312 tracks), respectively (Fig. 4B and 4C). Importantly, these rates are very similar to the  
313 rates of centripetal actin flow across the dSMAC and pSMAC, respectively (Fig. S5A1-  
314 A3). Together, these observations argue that the pSMAC actomyosin arc network works  
315 together with the dSMAC branched actin network to drive antigen centralization.

316 To identify the mechanism by which the actomyosin arcs drive antigen  
317 centralization, we imaged F-actin and anti-IgM in the medial portion of forming synapses  
318 at high magnification using TIRF-SIM. Anti-IgM microclusters were seen to move across  
319 the pSMAC towards the cSMAC (which in the following images was in the down  
320 direction) while embedded in an arc network moving in the same direction (Movie 10).  
321 White lines in Movie 10 and in the corresponding still images in Fig. 4D1-D6 mark actin  
322 arcs that were sweeping an individual anti-IgM microcluster inward (Fig. 4E1-E6).  
323 Figure 4F shows the trajectory of this microcluster (temporally color-coded) as it moved  
324 towards the cSMAC. Finally, a kymograph of this trajectory (Fig. 4G) shows that several  
325 actin arcs contributed to the inward movement of this microcluster (areas bracketed in  
326 white), and that pauses in movement (areas bracketed in pink) occurred where no actin  
327 signal was immediately adjacent to the microcluster. Together, these results argue that  
328 individual actin arcs move individual BCR: antigen microclusters inward via a sweeping  
329 mechanism that likely depends on frictional coupling between the actin arc and the

330 microcluster (53-55). While arcs can slip past microclusters, the overall incidence of  
331 such slippage must be fairly small as the rate of inward antigen transport across the  
332 pSMAC (Fig. 4C) is not significantly slower than the rate of inward actin arc flow across  
333 the pSMAC (Fig. S5A3).

### 334 **Integrin ligation-dependent IS formation requires myosin 2A contractility**

335 B cells engaged with membrane-bound antigen at low density fail to centralize  
336 antigen unless their integrin LFA-1 is also engaged with ICAM-1 in the target membrane  
337 (18). As a prelude to investigating the myosin dependence of this integrin co-stimulatory  
338 effect, we sought to recapitulate these findings using primary B cells and PLBs  
339 containing varying amounts of mobile, fluorophore-labeled anti-IgM antibody in the  
340 presence or absence of unlabeled ICAM-1. Using this approach, we determined an  
341 amount of anti-IgM antibody that would not elicit robust antigen centralization in the  
342 absence of ICAM-1, but would in its presence. B cells exhibited robust antigen  
343 centralization/cSMAC formation over 10 minutes without the need for ICAM-1 when the  
344 PLB was loaded using a solution containing anti-IgM at a concentration of 2  $\mu\text{g/ml}$   
345 (hereafter referred to as “high density antigen”) (Fig. S6A1-A3). By contrast, B cells  
346 formed antigen microclusters across their synaptic interface but failed to centralize them  
347 over 10 minutes when the PLB was loaded using a solution containing anti-IgM at a  
348 concentration 0.15  $\mu\text{g/ml}$  (hereafter referred to as “low or limiting density antigen”) (Fig.  
349 S6B1-B3). Importantly, when unlabeled ICAM-1 was included in these low-density  
350 antigen bilayers, B cells now exhibited robust antigen centralization/cSMAC formation  
351 (Fig. S6C1-C3). This co-stimulatory effect was supported by scoring antigen distribution  
352 as centralized, partially centralized or non-centralized (Fig. S6D1-D3 and E). It was also  
353 supported by scoring the percent of total synaptic antigen present within the cSMAC,  
354 which was defined by a circular area encompassing 20% of the entire synaptic interface  
355 and centered around the center of mass of the fluorescent antigen-containing pixels  
356 within the interface (Fig. S6F). Finally, it was supported by measuring the size of  
357 antigen clusters as a function of their distance from the center of the cSMAC (defined as  
358 above) (Fig. S6G). Specifically, B cells engaged with PLBs containing antigen at the  
359 limiting density and no ICAM-1 exhibited small antigen clusters ( $\sim 0.3 \mu\text{m}^2$ ) located  
360 roughly evenly across the synaptic interface (Fig. S6G, black trace), while B cells  
361 engaged with PLBs containing ICAM-1 in addition to antigen at the limiting density  
362 exhibited large antigen clusters (up to  $3 \mu\text{m}^2$ ), the largest of which were located at the  
363 center of the cSMAC (Fig. S6G, green trace). Of note, the total amount of antigen  
364 present at the synaptic interface was also greater for cells engaged with low density  
365 anti-IgM+ICAM-1 than for cells engaged with low density anti-IgM alone (Fig. S6H).  
366 Together, these results recapitulated a central aspect of the integrin co-stimulatory  
367 effect described by Carrasco *et al.* (18), and they established the specific conditions we  
368 used next to test the myosin dependence of this co-stimulatory effect.

369 To score the myosin dependence of the integrin co-stimulatory effect, we  
370 measured the ability of primary B cells treated with either vehicle control (DMSO) or  
371 pnBB to centralize antigen and form a cSMAC when engaged for 10 minutes with PLBs  
372 containing ICAM-1 and anti-IgM at the limiting density. While DMSO-treated cells  
373 exhibited robust antigen centralization/cSMAC formation (Fig. 5A1-A3), pnBB-treated  
374 cells failed to centralize antigen/create a cSMAC (Fig. 5B1-B3). Consistently, the actin  
375 arcs that surround centralized antigen in DMSO-treated cells (Fig. 5C1-C3; white  
376 arrows) were absent in pnBB-treated cells (Fig. 5D1-D3). The fact that myosin inhibition  
377 abrogates the integrin co-stimulatory effect was further supported by scoring antigen  
378 distribution in control and pnBB-treated cells as centralized, partially centralized or non-  
379 centralized (Fig. 5E), by scoring the percent of total synaptic antigen present within the  
380 cSMAC (Fig. 5F), and by measuring the size of antigen clusters as a function of their  
381 distance from the center of the cSMAC (Fig. 5G). Of note, the total amount of antigen  
382 present at the synaptic interface was also greater for cells treated with DMSO than for  
383 cells treated with pnBB (Fig. 5H). Together, these results show that the ability of integrin  
384 ligation to promote antigen centralization and cSMAC formation when antigen is limiting  
385 requires myosin contractility. This in turn argues that the contractile actomyosin arc  
386 network created downstream of integrin ligation plays an important role in the  
387 mechanism by which LFA-1 co-stimulation promotes B cell activation.

388 Finally, we were curious if the robust centralization of antigen that occurs in the  
389 absence of LFA-1 ligation when the density of antigen is high is also dependent on  
390 myosin contractility, at least to some extent. Indeed, we found that treatment with para-  
391 amino BB (paBB), a newer, slightly more water soluble version of BB (56), attenuated  
392 antigen centralization significantly even when the density of antigen was high (Fig. S6;  
393 see legend for details), although the magnitude of the inhibition was smaller than for B  
394 cells engaged with limiting antigen plus ICAM-1 (compare the results in Fig. S6 to the  
395 results in Fig. 5). We conclude, therefore, that M2A contractility potentiates antigen  
396 centralization when antigen density is high as well as when antigen density is low  
397 enough that LFA-1 co-stimulation becomes important for IS formation.

### 398 **Myosin 2A contractility promotes BCR-dependent signaling**

399 To measure the contribution that actomyosin arcs might make to BCR-dependent  
400 signaling, we determined the effect that pnBB has on the distribution and synaptic  
401 content of phosphorylated CD79a (P-CD79a), an early signaling molecule responsible  
402 for signal transduction downstream of BCR-antigen interaction (14, 57). Consistent with  
403 results above and with the known properties of CD79a, DMSO-treated primary B cells  
404 engaged for 10 minutes with PLBs containing ICAM-1 and limiting antigen and then  
405 fixed/stained for P-CD79a exhibited robust cSMAC formation, with P-CD79a and anti-  
406 IgM concentrated in the cSMAC (Fig. 6A1-A4). Also as expected, pnBB-treated B cells  
407 failed to form a clear cSMAC, resulting in CD79a and anti-IgM spread across the



408 synapse (Fig. 6B1-B4). Importantly, quantitation showed that pnBB-treated cells also  
409 exhibited a significant reduction relative to control cells in synaptic P-CD79a content  
410 (Fig. 6C). This defect was also seen after only 5 minutes on PLBs (Fig. S8A), and the  
411 defects at both time points were not due to differences between BB-treated cells and  
412 control cells in synaptic CD79a content (Fig. S8B).

413 To extend these results, we determined the effect that pnBB has on the  
414 distribution and synaptic content of phosphorylated CD19, an important co-receptor for  
415 the BCR that is responsible for PI3K activation (3, 58-60). DMSO-treated primary B cells  
416 engaged with PLBs as above exhibited robust cSMAC formation, with P-CD19 enriched  
417 at the outer edge of the IgM concentrated in the cSMAC (Fig. 6D1-D4). This enrichment  
418 of P-CD19 at the pSMAC/cSMAC boundary was confirmed by line scans of the  
419 fluorescence intensities for F-actin, anti-IgM and P-CD19 (Fig. 6G, see boxed pSMAC  
420 regions). In contrast to control cells, pnBB-treated B cells failed to concentrate anti-IgM  
421 at the center of the synapse, and P-CD19 staining was now spread across the synaptic  
422 interface (Fig. 6E1-E4 and H). Moreover, quantitation showed that pnBB-treated cells  
423 also exhibited a significant reduction relative to control cells in synaptic P-CD19 content  
424 (Fig. 6F) that was not due to a difference in synaptic CD19 content (Fig. S8C).  
425 Together, these results indicate that the actomyosin arcs promote BCR-dependent  
426 signaling.

### 427 **Germinal center B cells can make actomyosin arcs and centralize antigen**

428 Recent studies have presented evidence that germinal center (GC) B cells differ  
429 markedly from naive B cells with regard to the distribution and fate of antigen at mature  
430 synapses. Rather than concentrating antigen at the center of the synapse and using  
431 actomyosin force to extract it there, GC B cells accumulate antigen in clusters at the  
432 periphery of the synapse and use actomyosin force to extract it there (36, 61, 62).  
433 These and other results argue that GC B cells differ dramatically from naïve B cells with  
434 regard to the organization of actomyosin at their synapse. We wondered, however, if  
435 actomyosin arcs could be detected in mouse GC B cells using our imaging approaches.  
436 Consistently, TIRF-SIM imaging of mouse GC B cells isolated from the GFP-M2A  
437 knockin mouse that were stained with Cell Mask Deep Red and plated on coverslips  
438 coated with anti-IgM, anti-IgG and ICAM-1 revealed a subset of cells exhibiting  
439 enrichment of M2A filaments in the medial, pSMAC portion of the synapse (Movie 11),  
440 just as in naïve B cells. Moreover, these myosin filaments move centripetally (Movie 11)  
441 and co-localize with pSMAC actin arcs in phalloidin-stained samples (Fig. 7A1-A3, white  
442 arrows), just as in naive B cells. Importantly, scoring showed that about one third of GC  
443 B cells exhibit robust accumulation of M2A filaments in the pSMAC (Fig. 7B). Similar  
444 results were obtained when GFP-M2A knockin GC B cells were engaged for 10 minutes  
445 with PLBs containing fluorophore-labeled anti-IgM/IgG and unlabeled ICAM-1, and then

446 fixed and stained with phalloidin, where about one third of the cells exhibited  
447 actomyosin arcs in their pSMAC (Fig. 7C1-C4, white arrows, and D).

448         Given these results, we asked if our PLB-engaged mouse GC B cells can  
449 centralize antigen. In partial agreement with previous findings (61, 62), ~45% of  
450 synapses exhibited small to medium sized antigen clusters distributed to varying  
451 degrees in the synapse periphery (Fig. 7E1, E2 and F). In addition, ~20% of synapses  
452 exhibited antigen microclusters spread throughout the synaptic interface (Fig. 7E3 and  
453 F). Importantly, the remaining ~35% of synapses exhibited highly centralized antigen  
454 (Fig. 7E4 and F). We conclude, therefore, that GC B cells can make actomyosin arcs  
455 and centralize antigen like naïve B cells, although the degree to which they do these  
456 two things is considerably less than for naïve B cells.

457

458

## Discussion

459           Integrin co-stimulation promotes B cell activation and IS formation when antigen  
460 is limiting by promoting B cell adhesion (18, 19). Here we identified an actomyosin-  
461 dependent component of this integrin co-stimulatory effect. By combining super-  
462 resolution imaging with specific cytoskeletal perturbations, we showed that integrin  
463 ligation induces the formation of a pSMAC actomyosin arc network that comprises the  
464 major actin network at the primary B cell IS. This network is created by the formin  
465 mDia1, organized into a concentric, contractile structure by the molecular motor M2A,  
466 and promotes synapse formation by mechanically sweeping antigen clusters  
467 centripetally into the cSMAC. Most importantly, we showed that integrin-dependent  
468 synapse formation under conditions of limiting antigen requires M2A, as inhibiting its  
469 contractility significantly impairs antigen centralization. Consistently, myosin inhibition  
470 also diminishes the synaptic content of the key BCR signaling proteins P-CD79a and P-  
471 CD19 and disrupts their synaptic distribution. Finally, we showed that a significant  
472 fraction of GC B cells also make this contractile pSMAC actomyosin arc network.  
473 Together, our results argue that integrin co-stimulation promotes B cell activation and  
474 synapse formation not only by enhancing B cell adhesion (18), but also by eliciting the  
475 formation of a contractile actomyosin arc network that drives mechanical force-  
476 dependent IS formation. These findings invite a critical “reset” for the way in which  
477 future B cell studies should be approached by highlighting the need for integrin co-  
478 stimulation when examining the role of actin during B cell activation. This reset is  
479 especially important given that most *in vitro* studies of B cell IS formation and activation  
480 have been performed under conditions of excess antigen, while antigen is rarely  
481 available in excess *in vivo*.

482           A central player in the link between integrin co-stimulation and the formation of  
483 the actomyosin arc network is almost certainly active RhoA. First, active RhoA would  
484 drive arc formation by simultaneously targeting, unfolding and activating mDia1 at the  
485 plasma membrane (63, 64). Second, active RhoA would drive arc organization and  
486 contractility by activating the ROCK-dependent phosphorylation of the regulatory light  
487 chains on M2A (43), thereby promoting the assembly of the M2A bipolar filaments that  
488 decorate, organize and contract the arcs. Finally, it is likely that active RhoA would  
489 promote actomyosin arc formation by activating the ROCK-dependent phosphorylation  
490 of mDia1’s autoinhibitory domain, thereby blocking its refolding and subsequent  
491 inactivation (65-67). Given all this, it seems very likely that integrin ligation promotes  
492 actomyosin arc formation at least in part by promoting the loading of RhoA with GTP.  
493 Consistent with this idea, adhesion signaling has been linked in a variety of systems to  
494 the activation of guanine nucleotide exchange factors (GEFs) for RhoA (e.g.  
495 p190RhoGEF, GEF H1) (68, 69). Future work should seek, therefore, to clarify the  
496 outside-in signaling pathway in B cells that links integrin ligation to the activation of one

497 or more GEFs for RhoA. Such efforts should also take into account parallel activation  
498 pathways, such as the PI3K-dependent activation of RhoA downstream of BCR  
499 signaling (70), the myosin-dependent activation of B cell adhesion downstream of  
500 CXCR5 signaling (71), and the diacylglycerol kinase-dependent regulation of adhesion  
501 and actomyosin force generation at the B cell synapse (72). Given our results here, the  
502 ability of the B-cell integrin VLA-4, which binds VCAM-1 on APCs, to promote IS  
503 formation under limiting antigen conditions (19) may also involve an actomyosin-  
504 dependent mechanism. Indeed, actomyosin-dependent B cell IS formation may be a  
505 mechanism harnessed by multiple co-stimulatory pathways to promote B cell activation.

506 Consistent with our findings, a recent study by Bolger-Munro *et al.* reported that  
507 GFP-tagged M2A localizes to the medial portion of synapses formed by A20 B cells  
508 (13). In their hands, however, BB treatment did not inhibit antigen centralization, arguing  
509 that synapse formation does not require M2A. The disparity between their results and  
510 ours as regards the functional significance of M2A may be due to numerous differences  
511 in experimental design, including the cell type used (primary B cells versus the A20 B  
512 cell line), the mode of antigen presentation (anti-IgM-containing PLBs versus  
513 transmembrane antigen expressed by APCs), and the density of antigen (known in  
514 PLBs versus unknown and variable on APCs). Our pSMAC actomyosin arcs may also  
515 be related to the myosin-rich regions that form in primary HEL-specific naïve B cells  
516 bound to acrylamide gels coated with HEL antigen (47).

517 The contractile actomyosin structure identified here occupies the portion of the B-  
518 cell synapse defined by the presence of an integrin ring, i.e. the pSMAC (3, 18, 19, 73).  
519 This co-localization supports a feed-forward relationship where integrin co-stimulation  
520 promotes the formation of the actomyosin arcs, and the contractile forces that these  
521 arcs then exert promote further integrin activation and robust adhesion. Indeed, the B  
522 cell pSMAC can be viewed as roughly analogous to the lamellar region of mesenchymal  
523 cells, where integrins present within ECM-anchored focal adhesions are kept in their  
524 open, extended, high-affinity conformation by the forces that myosin-rich stress fibers  
525 exert on them (74, 75). By analogy, the contribution that the centering forces exerted by  
526 the actomyosin arcs make to integrin activation in the pSMAC may be enhanced in the  
527 context of an APC by the fact that the APC restricts ICAM-1 mobility (76).

528 Having established that naïve B cells use actomyosin arcs to promote IS  
529 formation, an obvious next question is whether they also use this contractile structure to  
530 drive the extraction of membrane-bound antigens, a process known to require M2A (61,  
531 77-79). Imaging synaptic actin and myosin in naïve B cells during the process of antigen  
532 extraction should shed considerable light on this question. In that vein, Roper *et al.*  
533 reported recently that the synapse of naïve B cells undergoing antigen extraction from  
534 antigen-bearing plasma membrane sheets (PMSs) is composed of a dynamic mixture of

535 Arp2/3 complex-dependent actin foci and formin-dependent linear filaments/fibers (80).  
536 While static images showed little co-localization between the actin foci and antigen  
537 clusters, dynamic imaging suggested that the foci promote antigen extraction (although  
538 the Arp2/3 complex and formins were both required for antigen uptake). Based on these  
539 and other observations, Roper *et al.* concluded that naïve B cells use a foci-filament  
540 network to drive force-dependent antigen extraction (80). How M2A provides the force  
541 in this context was unclear, however, as M2A (visualized using an antibody to the  
542 phosphorylated form of M2A's RLC) did not co-localize with either actin structure.  
543 Moreover, neither actin structure was affected by BB treatment. Of note, these two  
544 findings are at odds with our findings here that M2A (visualized by endogenous tagging  
545 of the M2A heavy chain) co-localizes extensively with actin arcs, and that BB treatment  
546 profoundly disrupts the organization of the pSMAC actin arc network. Finally, we note  
547 that the images of synaptic actin presented by Roper *et al.* look similar to our images of  
548 naïve B cells stimulated with anti-IgM alone (i.e. without ICAM-1), where the synapse  
549 was also composed of a disorganized and dynamic mixture of actin foci and short actin  
550 filaments/fibers. The fact that the PMSs used by Roper *et al.* do not present any integrin  
551 ligands may explain, therefore, why they did not see a more organized synapse  
552 containing actomyosin arcs.

553 While the force-dependent extraction of antigens by naïve B cells commonly  
554 initiates the process of antibody production, the force-dependent extraction of antigens  
555 by GC B cells is thought to drive the subsequent process of antibody affinity maturation  
556 by selecting for BCR: antigen interactions of higher affinity (2, 81). Consistently, GC B  
557 cells possess higher levels of active M2A and exert stronger pulling forces than naïve B  
558 cells, allowing them to extract antigens with higher affinities for the BCR (61, 62).  
559 Recent studies have shown that GC B cells accumulate antigen at the periphery of their  
560 synapse in association with actin-rich surface projections that mediate antigen  
561 extraction (61, 62). The striking difference between this behavior and that of naïve B  
562 cells, which centralize antigen prior to extraction, argues that GC B cells must differ  
563 dramatically from naïve B cells with regard to the organization of actomyosin at their  
564 synapse. We found, however, that about one third of GC B cells formed actomyosin  
565 arcs that were indistinguishable from those formed by naïve B cells. Moreover, about  
566 one third of GC B cells centralized antigen (although about half exhibited peripheral  
567 antigen clusters like those previously reported). While additional work is required to  
568 prove that the subset of GC B cells with actomyosin arcs are the ones that centralize  
569 antigen, this seems likely given our evidence here that actomyosin arcs drive antigen  
570 centralization in naïve B cells. Future work will also be required to understand why GC  
571 B cells vary with regard to actomyosin organization and the ability to centralize antigen  
572 (e.g. dark zone versus light zone GCs). That said, our results argue that the manner in  
573 which GC B cells harness actomyosin forces to extract antigen during the process of  
574 antibody affinity maturation may not be restricted to the previously reported pathway



575 (61, 62). Finally, we note that the PLBs and PMSs employed in those studies to image  
576 synaptic actin and antigen extraction did not contain integrin ligands. Given our results  
577 here, this might explain why the GC B cells in those studies did not contain actomyosin  
578 arcs.

579 Finally, future efforts should seek to define the role(s) played by the actomyosin  
580 arcs described here in the process of extracting membrane-bound antigen, as this  
581 process is impaired when M2A is inhibited or deleted (61, 77, 79). At a minimum, the  
582 ability of the actomyosin arcs to centralize and corral antigen at the cSMAC should  
583 promote antigen extraction no matter the exact extraction mechanism (15-17). As for a  
584 more direct role, the ability of the actomyosin arcs to create a ring of strong adhesion  
585 within the pSMAC that can grip the APC tightly may be required to extract antigens with  
586 high affinity for the BCR, much as a tight grip on the wine bottle is required to pull out its  
587 cork. This contractile structure also promotes both proximal signaling and the formation  
588 of larger antigen clusters, two processes that are likely linked mechanistically through  
589 the phase separation-dependent enhancement of signaling pathways (82). Whether the  
590 pSMAC actomyosin arcs contribute directly to the upward pulling forces inside the B cell  
591 that are thought to drive antigen extraction is, at the moment, unknown. Relevant to this  
592 question, M2A was not detected in the dispersed actin foci thought to mediate antigen  
593 extraction by naïve B cells engaged with antigen-bearing PMSs (80), or in the actin-rich,  
594 invadopodia-like structures thought to mediate antigen extraction by naïve B cells  
595 engaged with antigen-bearing acrylamide gels (47). Moreover, an association between  
596 M2A and the peripheral actin-rich pods thought to mediate antigen extraction by GC B  
597 cells engaged with antigen-bearing PMSs (62) has yet to be reported. We also note that  
598 none of the activating surfaces used in these studies contained integrin ligands, and  
599 that none of these studies examined antigen extraction in the context of a  
600 physiologically relevant form of antigen presentation (e.g. via Fc or complement  
601 receptors on the surface of a living cell). Given all this, further efforts to define the  
602 mechanism by which M2A powers the extraction of membrane-bound antigens should  
603 follow the myosin as the B cell extracts antigen from an APC, where the B cell's  
604 integrins will be engaged, and where the antigen can be presented in a physiologically  
605 relevant way. Perhaps only then will the role(s) played by M2A in antigen extraction be  
606 fully revealed.

607

608

## Materials and Methods

### 609 **Mice and cell culture**

610 Primary B cells were isolated from the spleens of 6 to 12 week-old C57BL/6 mice  
611 (Jackson Laboratories #002595) and M2A-GFP KI mice (gift of R. Adelstein,  
612 NHLBI/NIH) of either sex using negative selection B cell isolation (StemCell  
613 Technologies). Euthanasia was performed in accordance with protocols approved by  
614 the National Human Genome Research Institute Animal Use and Care Committee at the  
615 National Institutes of Health. The A20 murine IgG<sup>+</sup> B cell line was from ATCC (ATCC®  
616 TIB-208™). B cells were cultured in complete medium (RPMI-1640, 10% heat-  
617 inactivated fetal calf serum (FCS), 2 mM L-glutamine, 1 mM sodium pyruvate, 50 μM 2-  
618 mercaptoethanol and 1X Antibiotic-Antimycotic) at 37 °C with 5% CO<sub>2</sub>. Primary B cell  
619 complete media also contains 5 ng/ml of BAFF (R&D Systems).

620

### 621 **Plasmids and Reagents**

622 GFP- and tdTomato-tagged F-Tractin were gifts from Michael Schell (Uniformed  
623 Services University, Maryland). Alexa Fluor-conjugated phalloidins were purchased  
624 from Thermo Fisher. Anti-mDia1 antibody was purchased from Thermo Fisher (PA5-  
625 27607). HRP-conjugated mouse anti-β-actin antibody was purchased from Santa Cruz  
626 (SC-47778 HRP). Rabbit anti-CD79a (#3351), anti-PCD79a (#5173), anti-CD19 (#3574)  
627 and anti-PCD19 (#3571) were purchased from Cell Signaling Technologies. Anti-M2A  
628 was purchased from Millipore Sigma (#M8064) CK-666 and SMIFH2 were purchased  
629 from Millipore Sigma and used at final concentrations of 100 μM and 25 μM,  
630 respectively. pnBB and paBB were purchased from Cayman Chemicals and used at a  
631 final concentration of 25 μM. DMSO vehicle control was purchased from Millipore  
632 Sigma. CellMask™ Deep Red Plasma Membrane Stain was purchased from Thermo  
633 Fisher. Alexa Fluor 488- (#111-545-003), 594- (#111-585-003) and 647- (#111-605-003)  
634 conjugated goat, anti-rabbit secondary antibodies were purchased from Jackson  
635 ImmunoResearch. Goat anti-mouse IgG Fcγ fragment specific antibody (#115-005-008)  
636 and goat anti-mouse IgM, μ-chain specific antibodies (#115-005-020) were purchased  
637 from Jackson ImmunoResearch. Anti-rabbit-HRP (#32260) was purchased from Thermo  
638 Fisher.

639

### 640 **GC B cell generation and sorting**

641 GC B cells were generated and sorted using a previously described protocol (83).  
642 Briefly, 6 to 12 week-old M2A-GFP KI mice were immunized with sheep's red blood  
643 cells. After 8 to 10 days, total B cells from the spleens and lymph nodes were isolated  
644 using the Negative Selection B cell isolation kit (Stemcell Technologies) according to  
645 the manufacturer's instructions. Dead cells were stained using Zombie Yellow viability  
646 stain (Biolegend) and Fc receptors were blocked with the mouse TruStain FcX™  
647 antibody (#156604). Cells were immunostained with anti-mouse CD38 (#102719), B220

648 (#103235) and GL-7 (#144617) purchased from Biolegend. GC B cells were sorted on a  
649 BD Aria III FACs sorter (Beckton Dickinson) for GFP<sup>+</sup>, Zombie Yellow<sup>-</sup>, B220<sup>+</sup>, CD38<sup>low</sup>  
650 and GL-7<sup>+</sup> cells, and were used immediately.

651

### 652 **B cell transfection**

653 A20 B cells and primary B cells were transfected as previously described (25). Briefly,  
654 *ex vivo* primary B cells were first cultured for 12 h in complete media supplemented with  
655 5 ng/ml BAFF (R&D Systems) and 2.5 µg/ml *Escherichia coli* O111:B4 LPS (Millipore  
656 Sigma) (LPS was included to promote cell survival during nucleofection). 2x10<sup>6</sup> B cells  
657 were then nucleofected with 2 µg of plasmid DNA using Nucleofector Kit V (Lonza) and  
658 rested for 16-24 hours using complete media containing 5 ng/ml BAFF and lacking LPS.  
659 We refer to both rested, transfected cells and *ex vivo* non-manipulated cells as naïve B  
660 cells because neither had been activated by antigen.

661

### 662 **CRISPR**

663 Mouse GFP-M2A and Scarleti-M2A template plasmids were gifts from Jordan Beach  
664 (Loyola University, Chicago). Mouse M2A sgRNAs were synthesized by Synthego and  
665 used according to the manufacturer's instructions. Briefly, sgRNAs were mixed with  
666 Cas9 (New England Biolabs) to form ribonucleoproteins and then added together with  
667 0.5 µg of template plasmid to 2x10<sup>6</sup> cells suspended in the solution for Nucleofector kit  
668 V. Following nucleofection, the cells were cultured in complete media for 24 hours  
669 before Fluorescence-activated cell sorting (FACS) for GFP or Scarleti expression using  
670 the Aria III (Becton Dickinson).

671

### 672 **miRNA-mediated knockdown of mDia1**

673 miRNAs targeting the 3' UTR of mouse mDia1 were designed as previously described  
674 (84) using BLOCK-iT RNAi Designer (Thermo Fisher), synthesized (Gene Universal),  
675 and fused to the C-terminus of mNeonGreen-F-Tractin using In-Fusion cloning (Takara).  
676 A20 B cells were transfected with 2 µg of F-Tractin-mNeonGreen vector control or F-  
677 Tractin-mNeonGreen-mDia1-miRNAs and cultured in complete media for 16 hrs. Cells  
678 were then lysed and immunoblotted using an antibody to DIAPH1 (1:250; Thermo  
679 Fisher, PA5-27607) and an HRP-conjugated antibody to β-actin (1:5000; Santa Cruz,  
680 SC-47778 HRP) to confirm knockdown. Cells that had received the miRNA were  
681 identified based on the expression of F-Tractin-mNeonGreen and then quantified. F-  
682 Tractin-mNeonGreen-positive cells were also used in a cell spreading assay as  
683 described above. See Supplementary information for additional details.

684

### 685 **Cell spreading on functionalized glass**

686 8-well Labtek chambers (Nunc) were coated with 15 µg/ml of anti-IgM and/or anti-IgG  
687 with or without 0.5 µg/ml of mouse histidine-tagged ICAM-1 (Sino Biological) for 1 hour



688 at room temperature. B cells were resuspended in modified HEPES-buffered saline  
689 (mHBS) (25) and adhered to functionalized glass for 15 min at 37°C before live-imaging  
690 or fixing with 4% paraformaldehyde for staining (see SI Materials and Methods). Where  
691 inhibitors were used, cells were pretreated for 30 min with 100  $\mu$ M CK-666, 25  $\mu$ M  
692 SMIFH2, 25  $\mu$ M pnBB or paBB, or dH<sub>2</sub>O/DMSO vehicle control in mHBS at 37 °C. Cells  
693 were then added to functionalized Labtek chambers in mHBS containing the same  
694 concentrations of inhibitors or vehicle control as the pretreatment.

695

### 696 **Supported planar lipid bilayers**

697 Liposomes were prepared as described previously (26, 27, 85). Briefly, 0.4mM 1,2-  
698 dioleoyl-*sn*-glycero-3-phosphocholine, biotin-CAP-PE, 1,2-dioleoyl-*sn*-glycero-3-[(*N*-(5-  
699 amino-1-carboxypentyl)iminodiacetic acid)succinyl] (DGS)-NTA and 1,2-dioleoyl-*sn*-  
700 glycero-3-phosphocholine (Avanti Polar Lipids, Inc.) were mixed at 1:3:96 molar % ratio.  
701 Lipids were dried under a stream of argon and then desiccated in a vacuum chamber.  
702 Unilamellar liposomes were generated from lyophilized lipids hydrated in Tris-buffered  
703 saline via extrusion through a 50-nm pore membrane using a mini-extruder kit (Avanti  
704 Polar Lipids, Inc.). PLBs were assembled in Sticky-Slide VI<sup>0.4</sup> Luer closed chambers  
705 (Ibidi) as previously described (86). 25 × 75-mm glass coverslips (Ibidi) were cleaned  
706 using Piranha solution (1:3 ratio of sulfuric acid and 30% hydrogen peroxide). After  
707 depositing liposomes onto the flow channels, the channels were washed with HBS  
708 buffer containing 1% BSA. A solution containing mono-biotinylated, Alexa Fluor 647-  
709 labeled anti-IgM antibody (0.15  $\mu$ g/ml for the limiting antigen condition and 2  $\mu$ g/ml for  
710 the high antigen condition) and streptavidin (Sigma-Aldrich) were added to the flow  
711 chambers with or without 0.5  $\mu$ g/ml unlabeled histidine-tagged ICAM-1. Anti-IgM  
712 antibody ( $\mu$ -chain specific) was monobiotinylated and labeled with Alexa Fluor 647  
713 (Thermo Fisher) as described previously (18). The uniformity and lateral mobility of  
714 PLBs were assessed using FRAP as described previously (26). Photo bleached spots  
715 typically recovered within 60 seconds). B cells were resuspended in modified HEPES-  
716 buffered saline and allowed to engage PLBs at 37°C and imaged immediately, or fixed  
717 with 4% paraformaldehyde after 5 and 10 mins for immunostaining.

718

### 719 **Traction force microscopy**

720 Polyacrylamide gels (PA, 0.23 kPa shear modulus, 40  $\mu$ m thickness) were prepared on  
721 glass coverslips with embedded 40 nm fluorescent beads (TransFluoSpheres (633/720),  
722 Thermo Scientific), as described previously (87). B cells were resuspended in mHBS  
723 with 2% FCS and added to PA gels. Images of B cells that had engaged PA gels for 20  
724 mins were captured. A no-stress reference image of the PA gels with beads was  
725 captured after lifting cells from the PA gel by adding 1% sodium dodecyl sulfate in 1X  
726 PBS to the imaging chamber at a final concentration of 0.04%. Particle image  
727 velocimetry was used to calculate bead displacements relative to the reference position,

728 and the corresponding contractile energy was quantified using ImageJ plugins as  
729 previously described (87, 88). Traction forces were reported as the mean magnitude of  
730 traction stress within the cell relative to the cell surface area.

731

### 732 **Immunostaining**

733 Fixed cells were permeabilized with 0.2% Triton-X-100 and blocked for 30 min at room  
734 temperature using PBS containing 2% BSA. Cells were incubated with primary  
735 antibodies (1:200) overnight at 4°C and then secondary antibodies (1:250) with Alexa  
736 Fluor-conjugated phalloidins for 1h at room temperature. Antibodies and phalloidins  
737 were diluted in blocking buffer. All washes were performed with 1X PBS.

738

### 739 **Microscopy**

740 All live cell imaging was performed at 37 °C in mHBS supplemented with 2% FCS.  
741 TIRF-SIM and 3D-SIM imaging were performed on a GE DeltaVision OMX SR  
742 microscope (Cytiva) equipped with a 60X 1.42 NA oil objective (Olympus). For 3D-SIM,  
743 z-stacks were acquired at 0.125 µm increments. Raw data were reconstructed using  
744 Softworx software (Cytiva) with a Wiener filter constant of 0.002-0.003. Airyscan  
745 imaging was performed using an LSM 880 Zeiss confocal microscope equipped with  
746 Airyscan and using a Plan-Apochromat 63X 1.4 NA oil objective. Airyscan image  
747 reconstruction was performed using Zeiss ZEN imaging software. TFM was imaged  
748 using a Nikon Eclipse Ti2 microscope equipped with a 60X 1.2 NA water objective.  
749 Linear adjustments to images were made using ImageJ 1.53 (NIH).

750

### 751 **Image analyses**

752 All image analysis was performed using ImageJ (NIH). To compare the relative fraction  
753 of total IS footprint occupied by the cSMAC, pSMAC and dSMAC, the SMAC areas  
754 were manually drawn based on actin morphology (dendritic for dSMAC, actin arc for  
755 pSMAC, and hypodense for cSMAC) and then compared to the total IS area, which was  
756 determined based on thresholds for F-actin intensity at the synaptic interface.  
757 Fluorescence intensity within the SMAC regions was quantified using the ROIs from  
758 above and reported as the total background-corrected fluorescence within the ROI,  
759 which was quantified as described (89) using the following equation: Integrated density–  
760 [(area of ROI)×(mean background fluorescence per unit area)], where the integrated  
761 density is equal to [(area of ROI)×(mean fluorescence per unit area within the ROI)].  
762 Mean background fluorescence was determined using the same ROI size at 3 separate  
763 positions less than 3 µm away from the cell. The myosin fluorescence intensity in 3D  
764 SIM images was quantified using a maximum projection image of the image stacks  
765 where the cell ROI was determined based on the F-actin threshold and the background-  
766 corrected myosin fluorescence within the cell ROI was reported. The FibrilTool plugin  
767 for ImageJ was used to measure actin arc morphology as described previously (27, 45).

768 Briefly, the pSMAC regions in TIRF-SIM images were divided into 10-12 trapezoid-  
769 shaped ROIs of similar size to measure the anisotropy of arcs in the radially symmetric  
770 pSMAC. The values obtained range from 0, when the orientation of the structures is  
771 random, to 1, when the structures show higher orientation in the same direction. The  
772 velocity of centripetal actin flow was assessed by assembling kymographs from TIRF-  
773 SIM videos using the Kymograph Builder plugin from ImageJ, as previously described  
774 (27). Briefly, the dSMAC and pSMAC regions were identified by the relatively abrupt  
775 slope change for F-actin flow, and slope angles were used to quantify the rates of actin  
776 movement. The size of each antigen cluster and their relative distance from the cSMAC  
777 center were quantified using an ImageJ macro. First, the perimeter of the synaptic  
778 interface was determined based on thresholds for F-actin, and an ROI that  
779 encompassed the interface area was drawn (the synaptic ROI). The coordinates for  
780 each pixel contained in the ROI was determined and the linear distance of each pixel  
781 from the center of mass of the total synaptic antigen (defined as cSMAC center) was  
782 determined. The longest distance was defined as the furthest distance to travel from the  
783 outermost edge of the cell. A binary image of the antigen channel combined with the  
784 ImageJ watershed algorithm was used to segment individual antigen clusters within the  
785 synaptic ROI. The area of each antigen cluster was quantified using the Analyze  
786 Particles function in ImageJ. The relative distance of each antigen cluster was reported  
787 as the distance between the center of mass of the antigen cluster and the cSMAC  
788 center after normalizing to the furthest distance from the cell edge to the cSMAC center.  
789 To quantify the antigen fluorescence in the cSMAC, a circular ROI corresponding to  
790 20% of the total synaptic area (based on the average area of the cSMAC at the synaptic  
791 interface) was drawn such that the center of the circle lies at the same coordinates as  
792 the center of mass of the total antigen signal. Antigen fluorescence within this circle was  
793 quantified and presented as a percent of the total synaptic antigen fluorescence. The  
794 fluorescence intensity of the signaling molecules CD79a, P-CD79a, CD19 and P-CD19  
795 were all reported as the total fluorescence intensity within the synaptic ROI. All  
796 fluorescence intensities were corrected for background as described above.  
797 Fluorescence intensity profiles were obtained by drawing a 10  $\mu\text{m}$  line across the center  
798 of the synaptic interface and using the ImageJ function "Plot Profiles" to obtain  
799 fluorescence intensity values across the line. The intensity profiles of several cells were  
800 combined and the average fluorescence intensity  $\pm$  standard deviation was reported.  
801 The speeds of antigen cluster movement were quantified using the ImageJ plugin  
802 TrackMate as previously described (90) where a combination of automated and manual  
803 tracking were performed. Prior to quantification, the perimeter of the cell was identified  
804 by over-saturating the signal for GFP-M2A, and the anti-IgM fluorescence signal outside  
805 of the cell was removed so that only antigen clusters formed by that cell were quantified.  
806 Antigen clusters were determined using a blob diameter of 0.2  $\mu\text{m}^2$  and tracks were  
807 obtained using a threshold of 2000 units with sub-pixel localization. Mean antigen

808 cluster movement speeds were reported as distance traveled over time. Kymographs of  
809 moving antigen clusters were created using the ImageJ plugin Kymograph Builder.

810

### 811 **Statistical analyses**

812 All statistical analyses were performed using Prism 9 (GraphPad). Statistical  
813 comparisons of dot plots were performed using unpaired, two-tailed *t*-tests, and data are  
814 represented as mean  $\pm$  standard deviation. Statistical comparisons of bar charts were  
815 performed using paired, two-tailed *t*-tests, and data are represented as mean  $\pm$   
816 standard error of the mean. The following annotations are used to indicate significance:  
817 \* =  $P < 0.05$ , \*\* =  $P < 0.01$ , \*\*\* =  $P < 0.001$ , and \*\*\*\* =  $P < 0.0001$ .

818

819

### **Acknowledgments**

820 This work was supported by the Intramural Research Program of the National Heart,  
821 Lung, and Blood Institute (NHLBI) (1ZIAHL006121-04 to JAH). The authors thank the  
822 NHLBI Flow Cytometry Core, Dr. Xuefei Ma for providing M2A-GFP mice, Dr. Il-Young  
823 Hwang for immunizing mice to prepare GC B cells, and Dr. Christopher J. Alexander for  
824 advice on miRNA design.

825

826

### **Competing interests**

827 We have no competing interests to disclose.

828

829

830

## Figures

831

832 **Figure 1. ICAM-1 co-stimulation promotes the formation of actin arcs at the B cell**  
833 **IS.**

834 (A-F) GFP-F-Tractin-expressing primary B cells on glass coated with anti-IgM alone (A,  
835 B, E1, E2) or with anti-IgM+ICAM-1 (C, D, F1, F2) and imaged using Airyscan (A, C) or  
836 TIRF-SIM (B, D, E1, E2, F1, F2). The white arrows in A and B indicate the thin outer rim  
837 of dendritic actin in the dSMAC. The blue bars in A-D indicate the pSMAC. E2 and F2  
838 correspond to the boxed regions in E1 and F1, respectively. (G) Percent of cells with  
839 pSMAC actin arcs (N>67 cells/condition from 3 experiments). (H, I) Percent of total  
840 synaptic F-actin (H) and percent of total IS footprint (I) contained within the dSMAC,  
841 pSMAC and cSMAC portions of the synapse for primary B cells on anti-IgG/ICAM-1-  
842 coated glass (N=44 cells/condition from 6 experiments). (J1, J2) GFP-F-Tractin-  
843 expressing A20 B cell on anti-IgG/ICAM-1-coated glass. J2 corresponds to the boxed  
844 region in J1. The red arrows in C, D and J1 indicate actin arcs. Scale bars: 10  $\mu$ m.

845 **Figure 2. The actin arcs are created by the formin mDia1 acting at the outer edge**  
846 **of the IS.**

847 (A) GFP-F-Tractin-expressing primary B cell on anti-IgG/ICAM-1-coated glass. (B1, B2)  
848 Boxed regions in (A). (C1, C2) B1 and B2 with red lines applied to highlight linear actin  
849 filaments/bundles arising from surface spikes at the IS edge that are contiguous with  
850 actin arcs in the pSMAC. (D1, D2) GFP-F-Tractin-expressing primary B cell on anti-  
851 IgG/ICAM-1-coated glass before (D1) and 6 minutes after SMIFH2 addition (D2). (E) F-  
852 actin intensity profiles corresponding to the line scans in D1 (blue, before SMIFH2  
853 addition) and D2 (red, after SMIFH2 addition). (F1-F4) GFP-F-Tractin-expressing A20 B  
854 cells transfected with vector-only or the indicated mDia1 miRNA constructs and  
855 activated on anti-IgG/ICAM-1-coated glass. (G) Ratio of pSMAC to dSMAC F-actin  
856 (N>20 cells/condition from 2 experiments). (H) pSMAC F-actin content (N=20-26  
857 cells/condition from 2 experiments). A-C, and F: TIRF-SIM images; D: Airyscan images.  
858 Scale bars: 5  $\mu$ m in A, D2, and F1; 2  $\mu$ m in B1.

859 **Figure 3. Myosin 2A decorates the actin arcs and is required for their concentric**  
860 **organization.**

861 (A1-A5) Td-Tomato-F-Tractin expressing primary B cell from the M2A-GFP knockin  
862 mouse on anti-IgM/ICAM-1-coated glass. A4 and A5 correspond to the boxed regions in  
863 A1 and A2, respectively. (B1-B6) Still images at the indicated time points taken from a  
864 region within Movie 7 of a Td-Tomato-F-Tractin expressing primary B cell from the M2A-  
865 GFP knockin mouse. Different color arrowheads mark the formation and centripetal  
866 movement of individual M2A bipolar filaments (see text for details). (C, D) Phalloidin-



867 stained primary B cell from the M2A-GFP knockin mouse on glass coated with anti-IgM  
868 alone (C) or with anti-IgM+ICAM-1 (D). (E) Total synaptic M2A content (N=91-115  
869 cells/condition from 3 experiments). (F, G) GFP-F-Tractin-expressing primary B cells  
870 that had been pretreated with DMSO (F) or pnBB (G) for 30 minutes and activated on  
871 anti-IgM/ICAM-1-coated glass. (H) Anisotropy of the actin filaments/bundles present  
872 within the pSMAC (see also Fig. S2H) (N=369-423 ROIs from 30-37 cells from 3  
873 experiments). All panels: TIRF-SIM images. Scale bars: 3  $\mu$ m in A3 and B6; 250 nm in  
874 A5; 5  $\mu$ m in D and G.

875 **Figure 4. Actin arcs sweep antigen clusters centripetally.**

876 (A1-A3) Phalloidin-stained (green) primary B cell 15 min after engagement with a PLB  
877 containing unlabeled ICAM-1 and limiting anti-IgM (red). The white arrows in A1 and A3  
878 mark the actin arcs. (B) Tracks of single anti-IgM microclusters traveling centripetally  
879 across the dSMAC (red tracks) and pSMAC (green tracks) acquired from Movie 9. The  
880 white line indicates the outer edge of this cell. (C) Mean speed of single anti-IgM  
881 microclusters moving centripetally across the dSMAC and pSMAC (N=180-273 tracks  
882 from 3 well-spread cells). (D1-D6) Still images at the indicated time points from Movie  
883 10 showing the centripetal movement of actin arcs and a representative anti-IgM  
884 microcluster (white arrows) (the center of the synapse is directly below the images).  
885 Transparent white lines highlight the actin arcs that moved the microcluster  
886 centripetally. (E1-E6) Same as D1-D6 except showing only the anti-IgM microcluster,  
887 and indicating its centripetal path in blue. (F) Temporally pseudo-colored, projected  
888 image of the anti-IgM microcluster in (D) and (E). (G) Kymograph of the 3  $\mu$ m-long paths  
889 taken by the microcluster and the actin arcs in (D) and (E) over a period of 400s. The  
890 white brackets on the right indicate where actin arcs overlapped with and moved the  
891 microcluster, while the red brackets indicate where the movement of the microcluster  
892 stalled. A: Airyscan images; D-G: TIRF-SIM images. Scale bars: 5  $\mu$ m in A3 and B; 300  
893 nm in D6 and F.

894 **Figure 5. Integrin ligation-dependent IS formation requires myosin 2A**  
895 **contractility.**

896 (A1-A3) DMSO-treated, phalloidin-stained primary B cells 15 min after engagement with  
897 a PLB containing ICAM-1 and limiting anti-IgM. (B1-B3) Same as A1-A3 except the B  
898 cells were treated with pnBB. (C1-C3) Images of a representative, DMSO-treated  
899 primary B cell (white arrows mark actin arcs). (D1-D3) Images of a representative,  
900 pnBB-treated primary B cell. (E) Percent of cells exhibiting centralized, partially  
901 centralized and non-centralized antigen (see Figure S5D1-D3 for representative  
902 examples of these three types of antigen distribution) (N=126-144 cells/condition from 3  
903 experiments). (F) Percent of total synaptic antigen in the cSMAC (N=81-86  
904 cells/condition from 3 experiments). (G) Antigen cluster size as a function of normalized

905 distance from the cSMAC center (N=113-144 cells/condition from 3 experiments). (H)  
906 Total synaptic antigen content (N=56-62 cells/condition from 3 experiments). All panels:  
907 Airyscan images. Scale bars: 10  $\mu$ m in A1, B1, A3, and B3; 5  $\mu$ m in D3.

908 **Figure 6. Myosin 2A contractility promotes BCR signaling.**

909 (A1-A4) DMSO-treated primary B cell 10 min after engagement with a PLB containing  
910 ICAM-1 and limiting anti-IgM, and stained for F-actin and P-CD79a. (B1-B4) Same as  
911 A1-A4 except the B cell was treated with pnBB. (C) Synaptic P-CD79a content (N=55-  
912 81 cells/condition from 3 experiments). (D1-D4) DMSO-treated primary B cell 10 min  
913 after engagement with a PLB containing ICAM-1 and limiting anti-IgM, and stained for  
914 F-actin and P-CD19. (E1-E4) Same as D1-D4 except the cell was treated with pnBB. (F)  
915 Synaptic P-CD19 content (N=115-140 cells/condition from 3 experiments). (G)  
916 Fluorescence intensities across synapses for P-CD19 (red), antigen (grey), and F-actin  
917 (green) in B cells treated with DMSO (N=22 cells from 2 experiments). The position of  
918 the pSMAC is highlighted in blue. (H) Same as G except the cells were treated with  
919 pnBB (N=16 cells from 2 experiments). All panels: Airyscan images. Scale bars: 5  $\mu$ m in  
920 B4; 3  $\mu$ m in E4.

921 **Figure 7. GC B cells make actomyosin arcs.**

922 (A1-A3) Phalloidin-stained primary GC B cell from the M2A-GFP knockin mouse on anti-  
923 IgM/anti-IgG/ICAM-1-coated glass. White arrows mark the actomyosin arcs. (B) Percent  
924 of cells on glass that did or did not show M2A enrichment in the pSMAC (N=140 cells  
925 from 4 experiments). (C) Phalloidin-stained primary GC B cell from the M2A-GFP  
926 knockin mouse 15 min after engagement with a PLB containing anti-IgM, anti-IgG, and  
927 ICAM-1. (D) Percent of cells on PLBs that did or did not show M2A enrichment in the  
928 pSMAC (N=89 cells from 4 experiments). (E1-E4) Representative images of the three  
929 types of anti-Ig distribution exhibited by GC B cells 15 min after engagement with a PLB  
930 containing anti-IgG and ICAM-1 (cell outlines are shown in blue). (F) Percent of GC  
931 cells displaying the three types of anti-Ig distribution shown in E1-E4 (N=157 cells from  
932 6 experiments). All panels: TIRF-SIM images. Scale bars: 5  $\mu$ m in A3; 3  $\mu$ m in C4 and  
933 E4.

934

935

936



937

## References

938

- 939 1. Forthall DN, Functions of Antibodies. *Microbiol. Spectr.* **2**, 1-17 (2014).
- 940 2. Heesters BA, van der Poel CE, Das A, & Carroll MC, Antigen Presentation to B Cells. *Trends in*  
941 *Immunology* **37**, 844-854 (2016). 10.1016/j.it.2016.10.003.
- 942 3. Harwood NE & Batista FD, The cytoskeleton coordinates the early events of B-cell activation.  
943 *Cold Spring Harb. Perspect. Biol.* **3**, a002360 (2011). 10.1101/cshperspect.a002360.
- 944 4. Gonzalez SF, *et al.*, Trafficking of B cell antigen in lymph nodes. *Annu. Rev. Immunol.* **29**, 215-233  
945 (2011). 10.1146/annurev-immunol-031210-101255.
- 946 5. Carrasco YR & Batista FD, B cell recognition of membrane-bound antigen: an exquisite way of  
947 sensing ligands. *Curr. Opin. Immunol.* **18**, 286-291 (2006). 10.1016/j.coi.2006.03.013.
- 948 6. Cyster JG, B cell follicles and antigen encounters of the third kind. *Nat. Immunol.* **11**, 989-996  
949 (2010). 10.1038/ni.1946.
- 950 7. Wang JC & Hammer JA, The role of actin and myosin in antigen extraction by B lymphocytes.  
951 *Semin. Cell Dev. Biol.* **102**, 90-104 (2020). 10.1016/j.semcdb.2019.10.017.
- 952 8. Song W, Liu C, & Upadhyaya A, The pivotal position of the actin cytoskeleton in the initiation and  
953 regulation of B cell receptor activation. *Biochim. Biophys. Acta* **1838**, 569-578 (2014).  
954 10.1016/j.bbamem.2013.07.016.
- 955 9. Fleire SJ, *et al.*, B cell ligand discrimination through a spreading and contraction response.  
956 *Science* **312**, 738-741 (2006). 10.1126/science.1123940.
- 957 10. Tolar P, Sohn HW, Liu W, & Pierce SK, The molecular assembly and organization of signaling  
958 active B-cell receptor oligomers. *Immunol. Rev.* **232**, 34-41 (2009). 10.1111/j.1600-  
959 065X.2009.00833.x.
- 960 11. Mattila PK, Batista FD, & Treanor B, Dynamics of the actin cytoskeleton mediates receptor cross  
961 talk: An emerging concept in tuning receptor signaling. *J. Cell Biol.* **212**, 267-280 (2016).  
962 10.1083/jcb.201504137.
- 963 12. Treanor B, Harwood NE, & Batista FD, Microsignalosomes: spatially resolved receptor signalling.  
964 *Biochem. Soc. Trans.* **37**, 1014-1018 (2009). 10.1042/BST0371014.
- 965 13. Bolger-Munro M, *et al.*, Arp2/3 complex-driven spatial patterning of the BCR enhances immune  
966 synapse formation, BCR signaling and cell activation. *Elife* **8**, (2019). 10.7554/eLife.44574.
- 967 14. Batista FD, Treanor B, & Harwood NE, Visualizing a role for the actin cytoskeleton in the  
968 regulation of B-cell activation. *Immunol. Rev.* **237**, 191-204 (2010). 10.1111/j.1600-  
969 065X.2010.00943.x.
- 970 15. Batista FD, Iber D, & Neuberger MS, B cells acquire antigen from target cells after synapse  
971 formation. *Nature* **411**, 489-494 (2001). 10.1038/35078099.
- 972 16. Yuseff MI, Pierobon P, Reversat A, & Lennon-Dumenil AM, How B cells capture, process and  
973 present antigens: a crucial role for cell polarity. *Nat. Rev. Immunol.* **13**, 475-486 (2013).  
974 10.1038/nri3469.
- 975 17. Yuseff MI & Lennon-Dumenil AM, B cells use conserved polarity cues to regulate their antigen  
976 processing and presentation functions. *Front. Immunol.* **6**, 251 (2015).  
977 10.3389/fimmu.2015.00251.
- 978 18. Carrasco YR, Fleire SJ, Cameron T, Dustin ML, & Batista FD, LFA-1/ICAM-1 interaction lowers the  
979 threshold of B cell activation by facilitating B cell adhesion and synapse formation. *Immunity* **20**,  
980 589-599 (2004).
- 981 19. Carrasco YR & Batista FD, B-cell activation by membrane-bound antigens is facilitated by the  
982 interaction of VLA-4 with VCAM-1. *EMBO J.* **25**, 889-899 (2006). 10.1038/sj.emboj.7600944.

- 983 20. Springer TA, Adhesion receptors of the immune system. *Nature* **346**, 425-434 (1990).  
984 10.1038/346425a0.
- 985 21. Springer TA, Dustin ML, Kishimoto TK, & Marlin SD, The lymphocyte function-associated LFA-1,  
986 CD2, and LFA-3 molecules: cell adhesion receptors of the immune system. *Annu. Rev. Immunol.*  
987 **5**, 223-252 (1987). 10.1146/annurev.iy.05.040187.001255.
- 988 22. Wang JC, Bolger-Munro M, & Gold MR, Visualizing the Actin and Microtubule Cytoskeletons at  
989 the B-cell Immune Synapse Using Stimulated Emission Depletion (STED) Microscopy. *J. Vis. Exp.*  
990 (2018). 10.3791/57028.
- 991 23. Freeman SA, *et al.*, Cofilin-mediated F-actin severing is regulated by the Rap GTPase and  
992 controls the cytoskeletal dynamics that drive lymphocyte spreading and BCR microcluster  
993 formation. *J. Immunol.* **187**, 5887-5900 (2011). 10.4049/jimmunol.1102233.
- 994 24. Liu C, *et al.*, Actin reorganization is required for the formation of polarized B cell receptor  
995 signalosomes in response to both soluble and membrane-associated antigens. *J. Immunol.* **188**,  
996 3237-3246 (2012). 10.4049/jimmunol.1103065.
- 997 25. Wang JC, *et al.*, The Rap1-cofilin-1 pathway coordinates actin reorganization and MTOC  
998 polarization at the B cell immune synapse. *J. Cell Sci.* **130**, 1094-1109 (2017).  
999 10.1242/jcs.191858.
- 1000 26. Yi J, Wu XS, Crites T, & Hammer JA, 3rd, Actin retrograde flow and actomyosin II arc contraction  
1001 drive receptor cluster dynamics at the immunological synapse in Jurkat T cells. *Mol. Biol. Cell* **23**,  
1002 834-852 (2012). 10.1091/mbc.E11-08-0731.
- 1003 27. Murugesan S, *et al.*, Formin-generated actomyosin arcs propel T cell receptor microcluster  
1004 movement at the immune synapse. *J. Cell Biol.* **215**, 383-399 (2016). 10.1083/jcb.201603080.
- 1005 28. Goode BL & Eck MJ, Mechanism and function of formins in the control of actin assembly. *Annu.*  
1006 *Rev. Biochem.* **76**, 593-627 (2007). 10.1146/annurev.biochem.75.103004.142647.
- 1007 29. Breitsprecher D & Goode BL, Formins at a glance. *J. Cell Sci.* **126**, 1-7 (2013). 10.1242/jcs.107250.
- 1008 30. Chen Q, Nag S, & Pollard TD, Formins filter modified actin subunits during processive elongation.  
1009 *J. Struct. Biol.* **177**, 32-39 (2012). 10.1016/j.jsb.2011.10.005.
- 1010 31. Rizvi SA, *et al.*, Identification and characterization of a small molecule inhibitor of formin-  
1011 mediated actin assembly. *Chem. Biol.* **16**, 1158-1168 (2009). 10.1016/j.chembiol.2009.10.006.
- 1012 32. Nishimura Y, *et al.*, The formin inhibitor SMIFH2 inhibits members of the myosin superfamily. *J.*  
1013 *Cell Sci.* **134**, (2021). 10.1242/jcs.253708.
- 1014 33. Burke TA, *et al.*, Homeostatic actin cytoskeleton networks are regulated by assembly factor  
1015 competition for monomers. *Curr. Biol.* **24**, 579-585 (2014). 10.1016/j.cub.2014.01.072.
- 1016 34. Lomakin AJ, *et al.*, Competition for actin between two distinct F-actin networks defines a  
1017 bistable switch for cell polarization. *Nat. Cell Biol.* **17**, 1435-1445 (2015). 10.1038/ncb3246.
- 1018 35. Fritzsche M, Erlenkamper C, Moeendarbary E, Charras G, & Kruse K, Actin kinetics shapes  
1019 cortical network structure and mechanics. *Sci. Adv.* **2**, e1501337 (2016).  
1020 10.1126/sciadv.1501337.
- 1021 36. Hammer JA, Wang JC, Saeed M, & Pedrosa AT, Origin, Organization, Dynamics, and Function of  
1022 Actin and Actomyosin Networks at the T Cell Immunological Synapse. *Annu. Rev. Immunol.* **37**,  
1023 201-224 (2019). 10.1146/annurev-immunol-042718-041341.
- 1024 37. Vicente-Manzanares M, Ma X, Adelstein RS, & Horwitz AR, Non-muscle myosin II takes centre  
1025 stage in cell adhesion and migration. *Nat. Rev. Mol. Cell Biol.* **10**, 778-790 (2009).  
1026 10.1038/nrm2786.
- 1027 38. Sellers JR, Myosins: a diverse superfamily. *Biochim. Biophys. Acta* **1496**, 3-22 (2000).  
1028 10.1016/s0167-4889(00)00005-7.
- 1029 39. Shutova MS & Svitkina TM, Common and Specific Functions of Nonmuscle Myosin II Paralogs in  
1030 Cells. *Biochemistry (Mosc)* **83**, 1459-1468 (2018). 10.1134/S0006297918120040.

- 1031 40. Zhang Y, *et al.*, Mouse models of MYH9-related disease: mutations in nonmuscle myosin II-A.  
1032 *Blood* **119**, 238-250 (2012). 10.1182/blood-2011-06-358853.
- 1033 41. Beach JR, *et al.*, Nonmuscle myosin II isoforms coassemble in living cells. *Curr. Biol.* **24**, 1160-  
1034 1166 (2014). 10.1016/j.cub.2014.03.071.
- 1035 42. Beach JR, *et al.*, Actin dynamics and competition for myosin monomer govern the sequential  
1036 amplification of myosin filaments. *Nat. Cell Biol.* **19**, 85-93 (2017). 10.1038/ncb3463.
- 1037 43. Beach JR & Hammer JA, 3rd, Myosin II isoform co-assembly and differential regulation in  
1038 mammalian systems. *Exp. Cell Res.* **334**, 2-9 (2015). 10.1016/j.yexcr.2015.01.012.
- 1039 44. Kepiro M, *et al.*, para-Nitroblebbistatin, the non-cytotoxic and photostable myosin II inhibitor.  
1040 *Angew. Chem. Int. Ed. Engl.* **53**, 8211-8215 (2014). 10.1002/anie.201403540.
- 1041 45. Boudaoud A, *et al.*, FibrilTool, an ImageJ plug-in to quantify fibrillar structures in raw microscopy  
1042 images. *Nat. Protoc.* **9**, 457-463 (2014). 10.1038/nprot.2014.024.
- 1043 46. Wang J, *et al.*, Profiling the origin, dynamics, and function of traction force in B cell activation.  
1044 *Sci. Signal.* **11**, (2018). 10.1126/scisignal.aai9192.
- 1045 47. Kumari A, *et al.*, Actomyosin-driven force patterning controls endocytosis at the immune  
1046 synapse. *Nat. Commun.* **10**, 2870 (2019). 10.1038/s41467-019-10751-7.
- 1047 48. Gardel ML, Schneider IC, Aratyn-Schaus Y, & Waterman CM, Mechanical integration of actin and  
1048 adhesion dynamics in cell migration. *Annu. Rev. Cell. Dev. Biol.* **26**, 315-333 (2010).  
1049 10.1146/annurev.cellbio.011209.122036.
- 1050 49. Case LB & Waterman CM, Integration of actin dynamics and cell adhesion by a three-  
1051 dimensional, mechanosensitive molecular clutch. *Nat. Cell Biol.* **17**, 955-963 (2015).  
1052 10.1038/ncb3191.
- 1053 50. Comrie WA & Burkhardt JK, Action and Traction: Cytoskeletal Control of Receptor Triggering at  
1054 the Immunological Synapse. *Front. Immunol.* **7**, 68 (2016). 10.3389/fimmu.2016.00068.
- 1055 51. Schnyder T, *et al.*, B cell receptor-mediated antigen gathering requires ubiquitin ligase Cbl and  
1056 adaptors Grb2 and Dok-3 to recruit dynein to the signaling microcluster. *Immunity* **34**, 905-918  
1057 (2011). 10.1016/j.immuni.2011.06.001.
- 1058 52. Hashimoto-Tane A, *et al.*, Dynein-driven transport of T cell receptor microclusters regulates  
1059 immune synapse formation and T cell activation. *Immunity* **34**, 919-931 (2011).  
1060 10.1016/j.immuni.2011.05.012.
- 1061 53. Yu CH, Wu HJ, Kaizuka Y, Vale RD, & Groves JT, Altered actin centripetal retrograde flow in  
1062 physically restricted immunological synapses. *PLoS One* **5**, e11878 (2010).  
1063 10.1371/journal.pone.0011878.
- 1064 54. Ditlev JA, *et al.*, A composition-dependent molecular clutch between T cell signaling  
1065 condensates and actin. *Elife* **8**, (2019). 10.7554/eLife.42695.
- 1066 55. Smoligovets AA, Smith AW, Wu HJ, Petit RS, & Groves JT, Characterization of dynamic actin  
1067 associations with T-cell receptor microclusters in primary T cells. *J. Cell Sci.* **125**, 735-742 (2012).  
1068 10.1242/jcs.092825.
- 1069 56. Varkuti BH, *et al.*, A highly soluble, non-phototoxic, non-fluorescent blebbistatin derivative. *Sci.*  
1070 *Rep.* **6**, 26141 (2016). 10.1038/srep26141.
- 1071 57. Tanaka S & Baba Y, B Cell Receptor Signaling. *Adv. Exp. Med. Biol.* **1254**, 23-36 (2020).  
1072 10.1007/978-981-15-3532-1\_2.
- 1073 58. Tuveson DA, Carter RH, Soltoff SP, & Fearon DT, CD19 of B cells as a surrogate kinase insert  
1074 region to bind phosphatidylinositol 3-kinase. *Science* **260**, 986-989 (1993).  
1075 10.1126/science.7684160.
- 1076 59. Keppler SJ, *et al.*, Wiskott-Aldrich Syndrome Interacting Protein Deficiency Uncovers the Role of  
1077 the Co-receptor CD19 as a Generic Hub for PI3 Kinase Signaling in B Cells. *Immunity* **43**, 660-673  
1078 (2015). 10.1016/j.immuni.2015.09.004.

- 1079 60. Depoil D, *et al.*, CD19 is essential for B cell activation by promoting B cell receptor-antigen  
1080 microcluster formation in response to membrane-bound ligand. *Nat. Immunol.* **9**, 63-72 (2008).  
1081 10.1038/ni1547.
- 1082 61. Nowosad CR, Spillane KM, & Tolar P, Germinal center B cells recognize antigen through a  
1083 specialized immune synapse architecture. *Nat. Immunol.* **17**, 870-877 (2016). 10.1038/ni.3458.
- 1084 62. Kwak K, *et al.*, Intrinsic properties of human germinal center B cells set antigen affinity  
1085 thresholds. *Sci. Immunol.* **3**, (2018). 10.1126/sciimmunol.aau6598.
- 1086 63. Kuhn S & Geyer M, Formins as effector proteins of Rho GTPases. *Small GTPases* **5**, e29513  
1087 (2014). 10.4161/sgtp.29513.
- 1088 64. Rose R, *et al.*, Structural and mechanistic insights into the interaction between Rho and  
1089 mammalian Dia. *Nature* **435**, 513-518 (2005). 10.1038/nature03604.
- 1090 65. Nezami AG, Poy F, & Eck MJ, Structure of the autoinhibitory switch in formin mDia1. *Structure*  
1091 **14**, 257-263 (2006). 10.1016/j.str.2005.12.003.
- 1092 66. Maiti S, *et al.*, Structure and activity of full-length formin mDia1. *Cytoskeleton (Hoboken, N.J.)*  
1093 **69**, 393-405 (2012). 10.1002/cm.21033.
- 1094 67. Staus DP, Taylor JM, & Mack CP, Enhancement of mDia2 activity by Rho-kinase-dependent  
1095 phosphorylation of the diaphanous autoregulatory domain. *Biochem. J.* **439**, 57-65 (2011).  
1096 10.1042/BJ20101700.
- 1097 68. Guilluy C, *et al.*, The Rho GEFs LARG and GEF-H1 regulate the mechanical response to force on  
1098 integrins. *Nat. Cell Biol.* **13**, 722-727 (2011). 10.1038/ncb2254.
- 1099 69. Lawson CD & Burridge K, The on-off relationship of Rho and Rac during integrin-mediated  
1100 adhesion and cell migration. *Small GTPases* **5**, e27958 (2014). 10.4161/sgtp.27958.
- 1101 70. Saci A & Carpenter CL, RhoA GTPase regulates B cell receptor signaling. *Mol. Cell* **17**, 205-214  
1102 (2005). 10.1016/j.molcel.2004.12.012.
- 1103 71. Saez de Guinoa J, Barrio L, Mellado M, & Carrasco YR, CXCL13/CXCR5 signaling enhances BCR-  
1104 triggered B-cell activation by shaping cell dynamics. *Blood* **118**, 1560-1569 (2011).  
1105 10.1182/blood-2011-01-332106.
- 1106 72. Merino-Cortes SV, *et al.*, Diacylglycerol kinase zeta promotes actin cytoskeleton remodeling and  
1107 mechanical forces at the B cell immune synapse. *Sci. Signal.* **13**, (2020).  
1108 10.1126/scisignal.aaw8214.
- 1109 73. Dustin ML, Chakraborty AK, & Shaw AS, Understanding the structure and function of the  
1110 immunological synapse. *Cold Spring Harb. Perspect. Biol.* **2**, a002311 (2010).  
1111 10.1101/cshperspect.a002311.
- 1112 74. Nordenfelt P, Elliott HL, & Springer TA, Coordinated integrin activation by actin-dependent force  
1113 during T-cell migration. *Nat. Commun.* **7**, 13119 (2016). 10.1038/ncomms13119.
- 1114 75. Parsons JT, Horwitz AR, & Schwartz MA, Cell adhesion: integrating cytoskeletal dynamics and  
1115 cellular tension. *Nat. Rev. Mol. Cell Biol.* **11**, 633-643 (2010). 10.1038/nrm2957.
- 1116 76. Comrie WA, Li S, Boyle S, & Burkhardt JK, The dendritic cell cytoskeleton promotes T cell  
1117 adhesion and activation by constraining ICAM-1 mobility. *J. Cell Biol.* **208**, 457-473 (2015).  
1118 10.1083/jcb.201406120.
- 1119 77. Natkanski E, *et al.*, B cells use mechanical energy to discriminate antigen affinities. *Science* **340**,  
1120 1587-1590 (2013). 10.1126/science.1237572.
- 1121 78. Spillane KM & Tolar P, Mechanics of antigen extraction in the B cell synapse. *Mol. Immunol.* **101**,  
1122 319-328 (2018). 10.1016/j.molimm.2018.07.018.
- 1123 79. Hoogeboom R, *et al.*, Myosin IIa Promotes Antibody Responses by Regulating B Cell Activation,  
1124 Acquisition of Antigen, and Proliferation. *Cell Rep.* **23**, 2342-2353 (2018).  
1125 10.1016/j.celrep.2018.04.087.

- 1126 80. Roper SI, *et al.*, B cells extract antigens at Arp2/3-generated actin foci interspersed with linear  
1127 filaments. *Elife* **8**, (2019). 10.7554/eLife.48093.
- 1128 81. Spillane KM & Tolar P, B cell antigen extraction is regulated by physical properties of antigen-  
1129 presenting cells. *J. Cell Biol.* **216**, 217-230 (2017). 10.1083/jcb.201607064.
- 1130 82. Huang WYC, *et al.*, A molecular assembly phase transition and kinetic proofreading modulate  
1131 Ras activation by SOS. *Science* **363**, 1098-1103 (2019). 10.1126/science.aau5721.
- 1132 83. Hwang IY, *et al.*, An essential role for RGS protein/Galphi2 interactions in B lymphocyte-  
1133 directed cell migration and trafficking. *J. Immunol.* **194**, 2128-2139 (2015).  
1134 10.4049/jimmunol.1401952.
- 1135 84. Alexander CJ & Hammer JA, 3rd, Optimization of cerebellar purkinje neuron cultures and  
1136 development of a plasmid-based method for purkinje neuron-specific, miRNA-mediated protein  
1137 knockdown. *Methods Cell Biol.* **131**, 177-197 (2016). 10.1016/bs.mcb.2015.06.004.
- 1138 85. Hong J, Murugesan S, Betzig E, & Hammer JA, Contractile actomyosin arcs promote the  
1139 activation of primary mouse T cells in a ligand-dependent manner. *PLoS One* **12**, e0183174  
1140 (2017). 10.1371/journal.pone.0183174.
- 1141 86. Comrie WA, Babich A, & Burkhardt JK, F-actin flow drives affinity maturation and spatial  
1142 organization of LFA-1 at the immunological synapse. *J. Cell Biol.* **208**, 475-491 (2015).  
1143 10.1083/jcb.201406121.
- 1144 87. Jaumouille V, Cartagena-Rivera AX, & Waterman CM, Coupling of beta2 integrins to actin by a  
1145 mechanosensitive molecular clutch drives complement receptor-mediated phagocytosis. *Nat.*  
1146 *Cell Biol.* **21**, 1357-1369 (2019). 10.1038/s41556-019-0414-2.
- 1147 88. Martiel JL, *et al.*, Measurement of cell traction forces with ImageJ. *Methods Cell Biol.* **125**, 269-  
1148 287 (2015). 10.1016/bs.mcb.2014.10.008.
- 1149 89. Burgess A, *et al.*, Loss of human Greatwall results in G2 arrest and multiple mitotic defects due  
1150 to deregulation of the cyclin B-Cdc2/PP2A balance. *Proc. Natl. Acad. Sci.* **107**, 12564-12569  
1151 (2010). 10.1073/pnas.0914191107.
- 1152 90. Tinevez JY, *et al.*, TrackMate: An open and extensible platform for single-particle tracking.  
1153 *Methods* **115**, 80-90 (2017). 10.1016/j.ymeth.2016.09.016.

1154

1155

1156



Figure 1

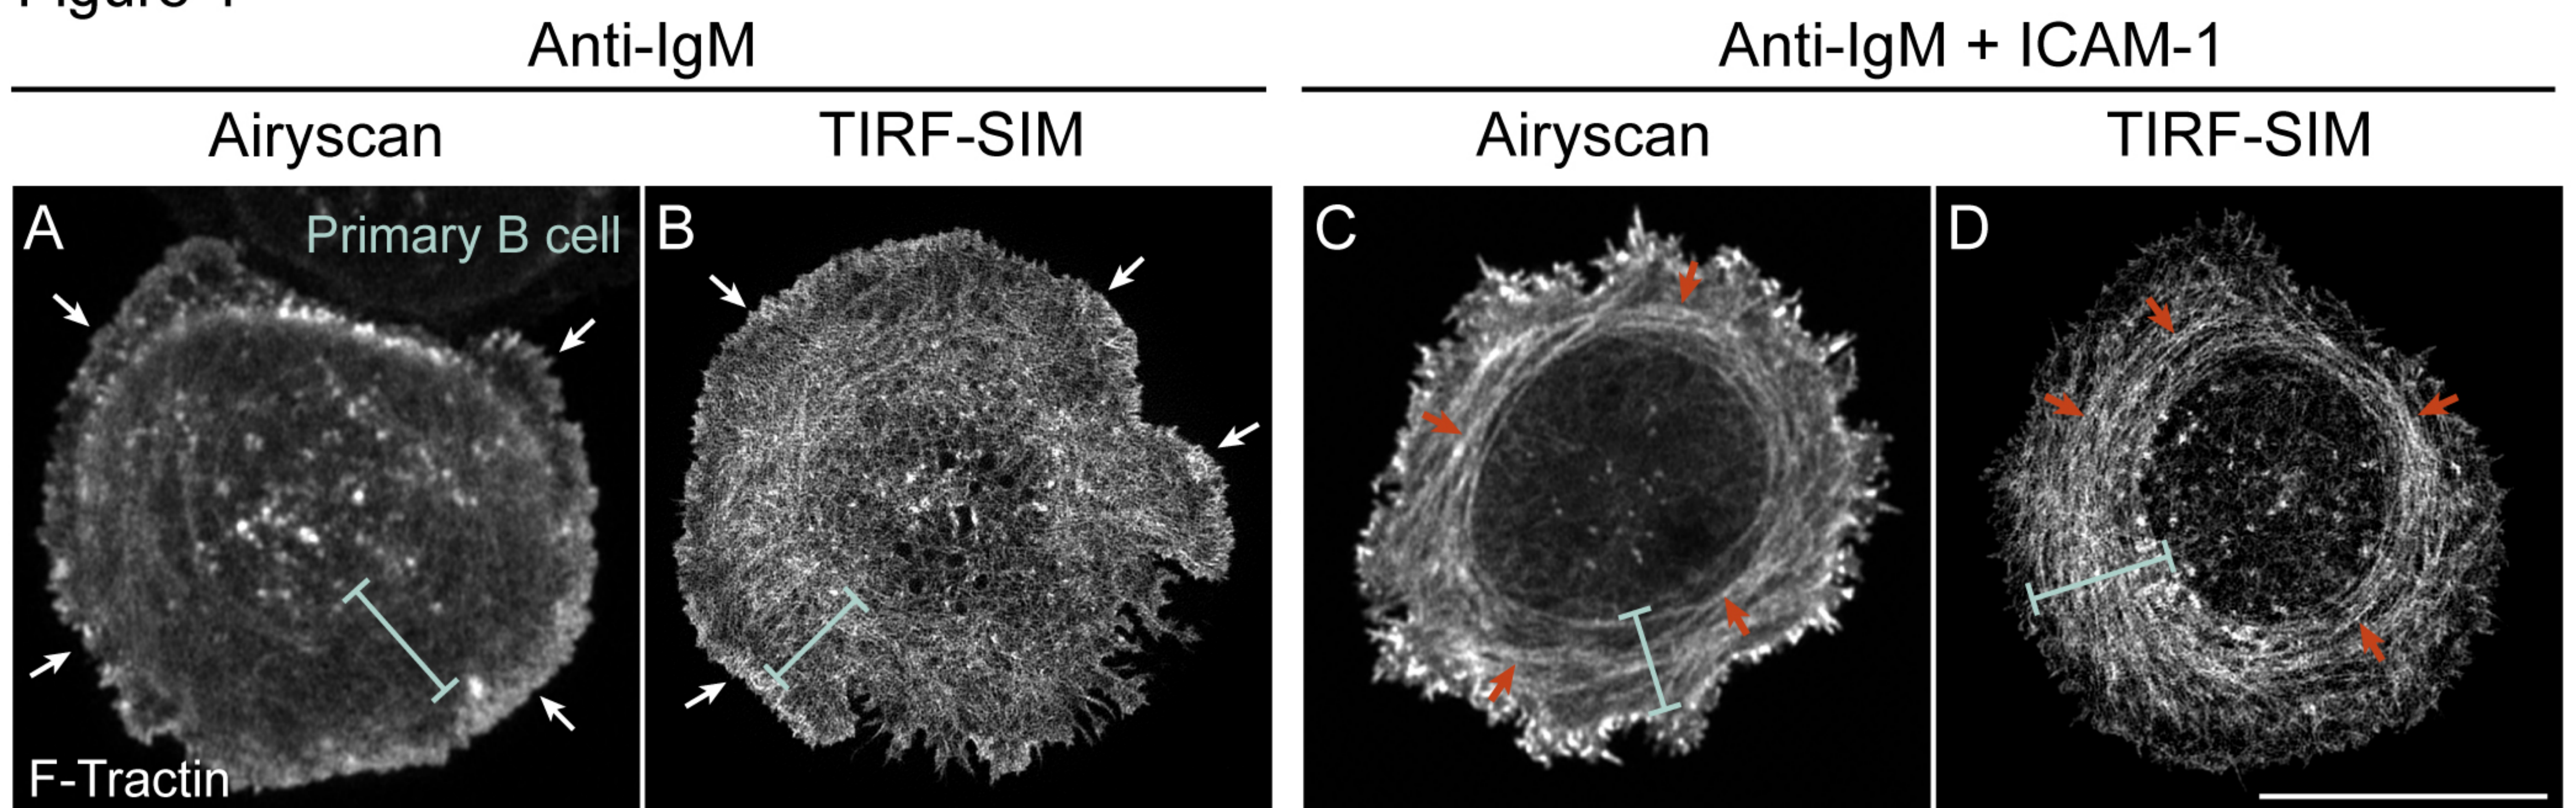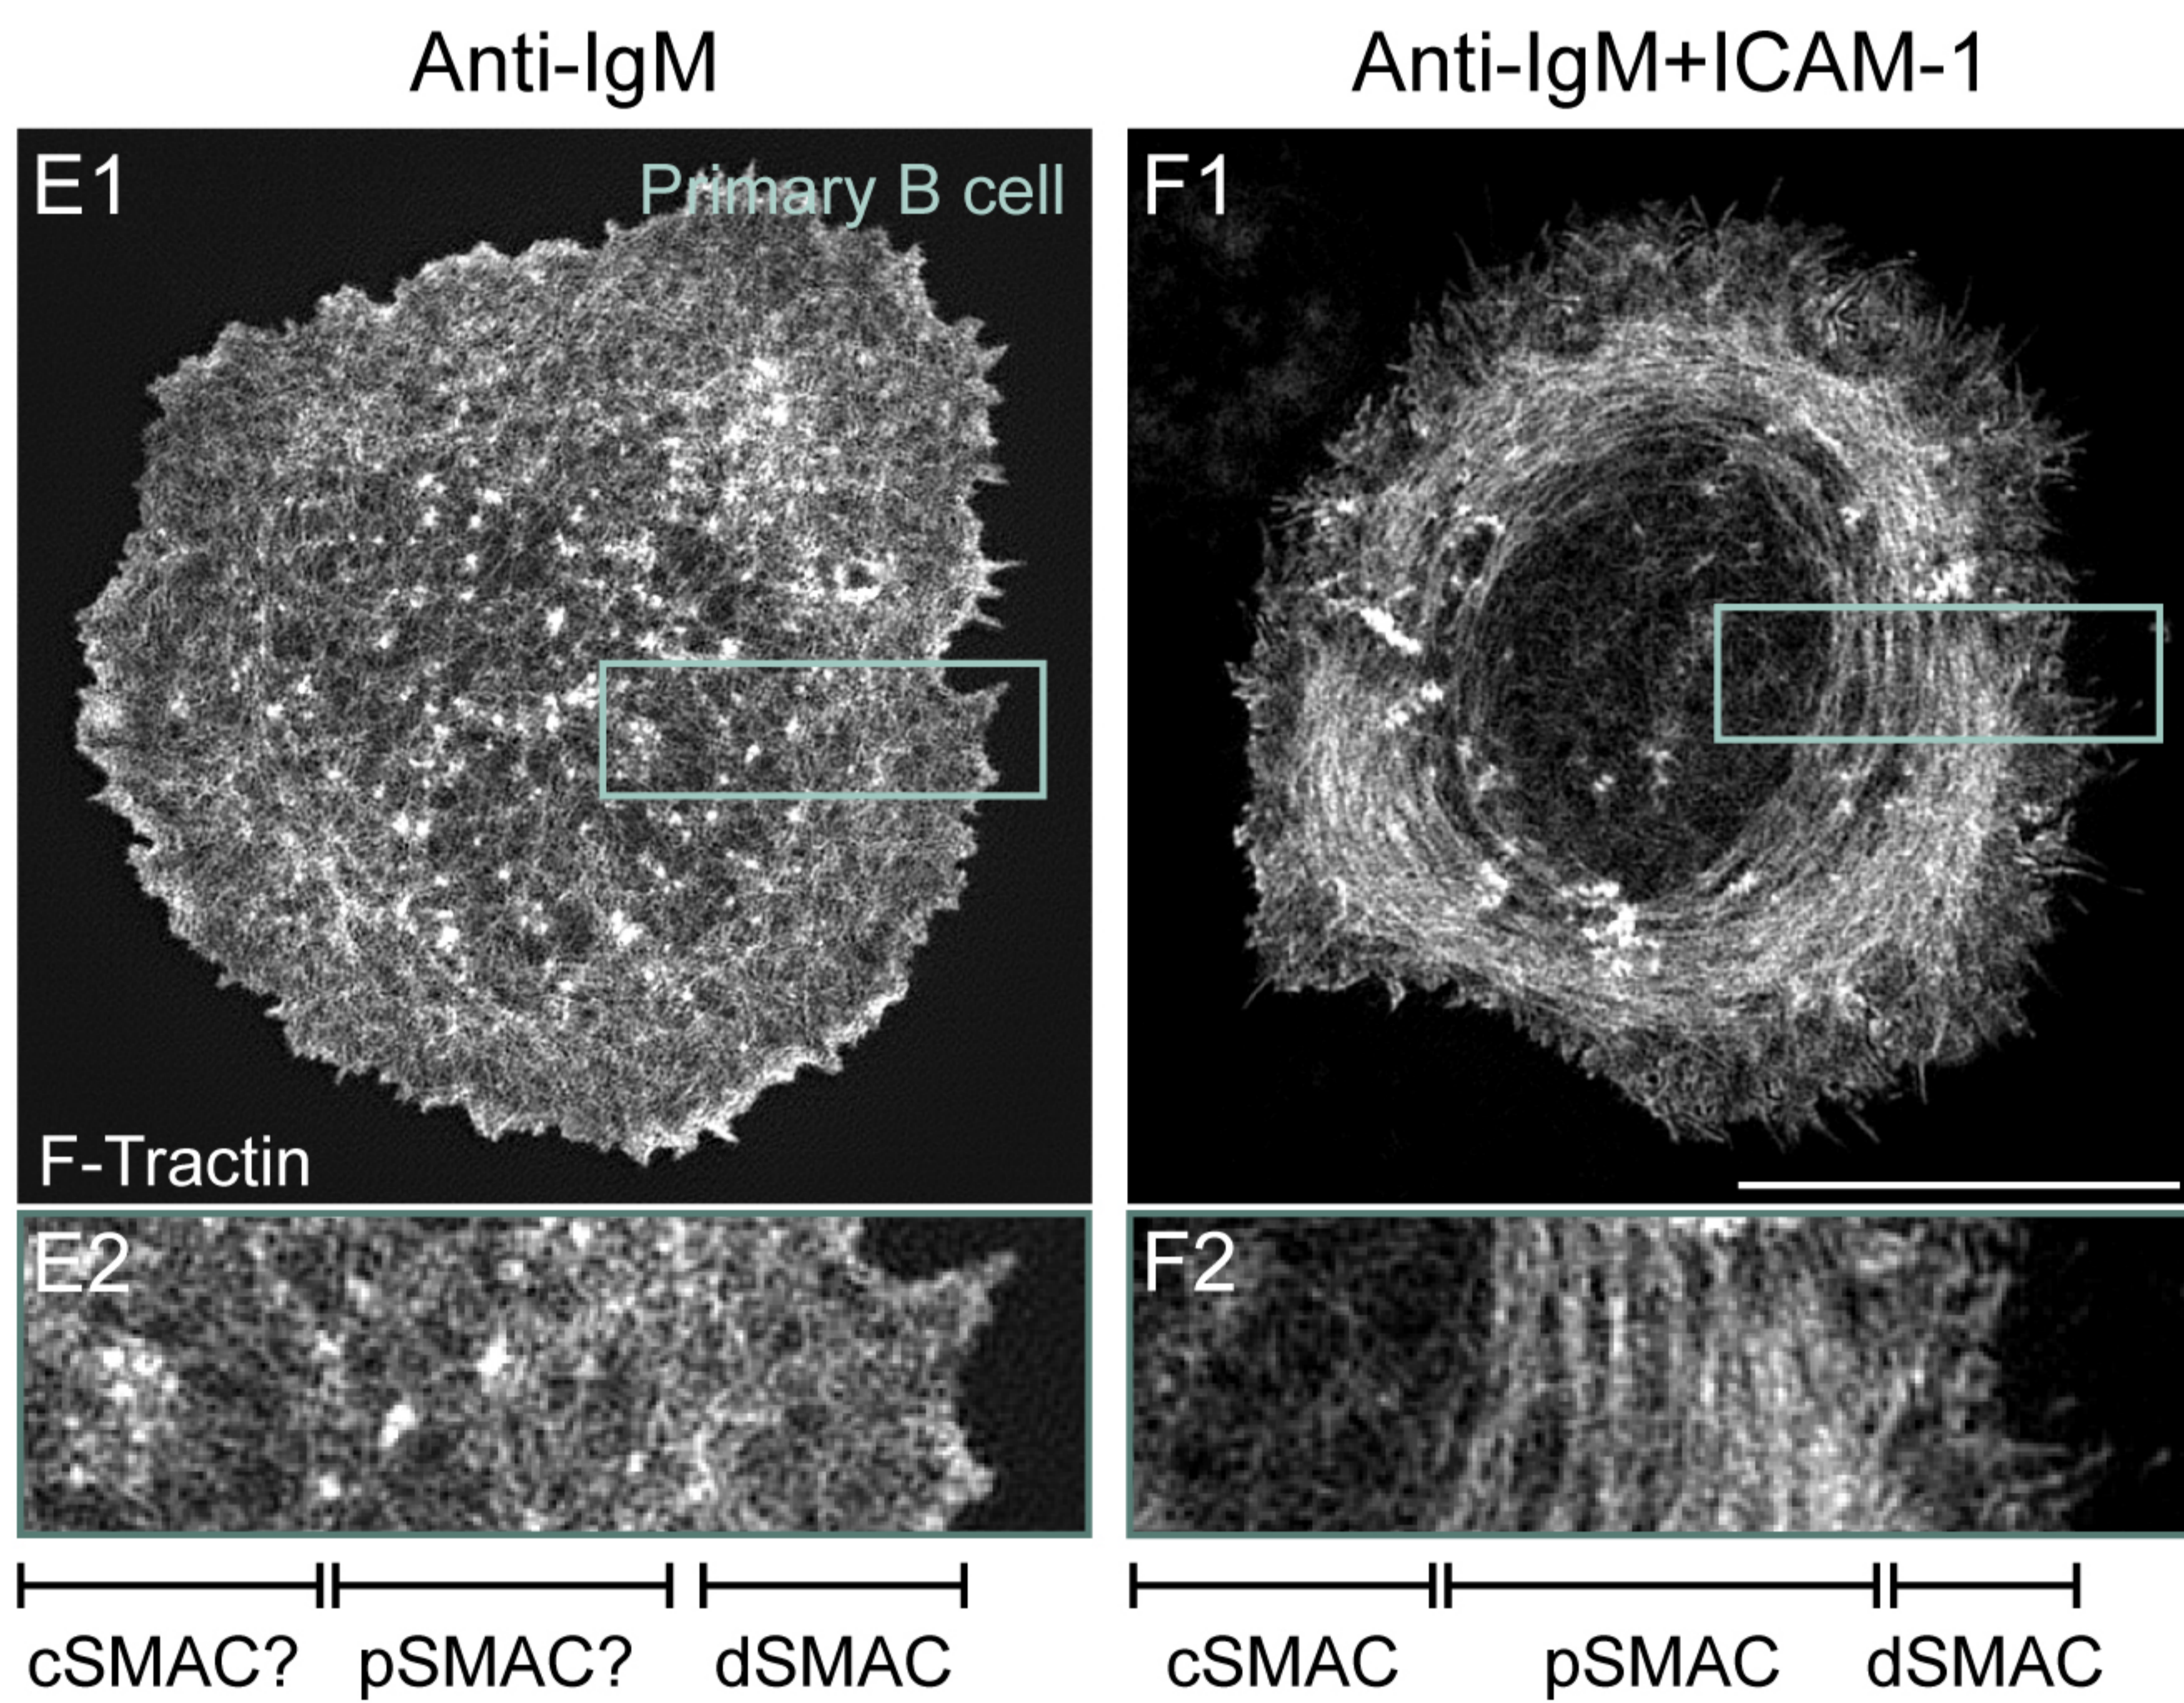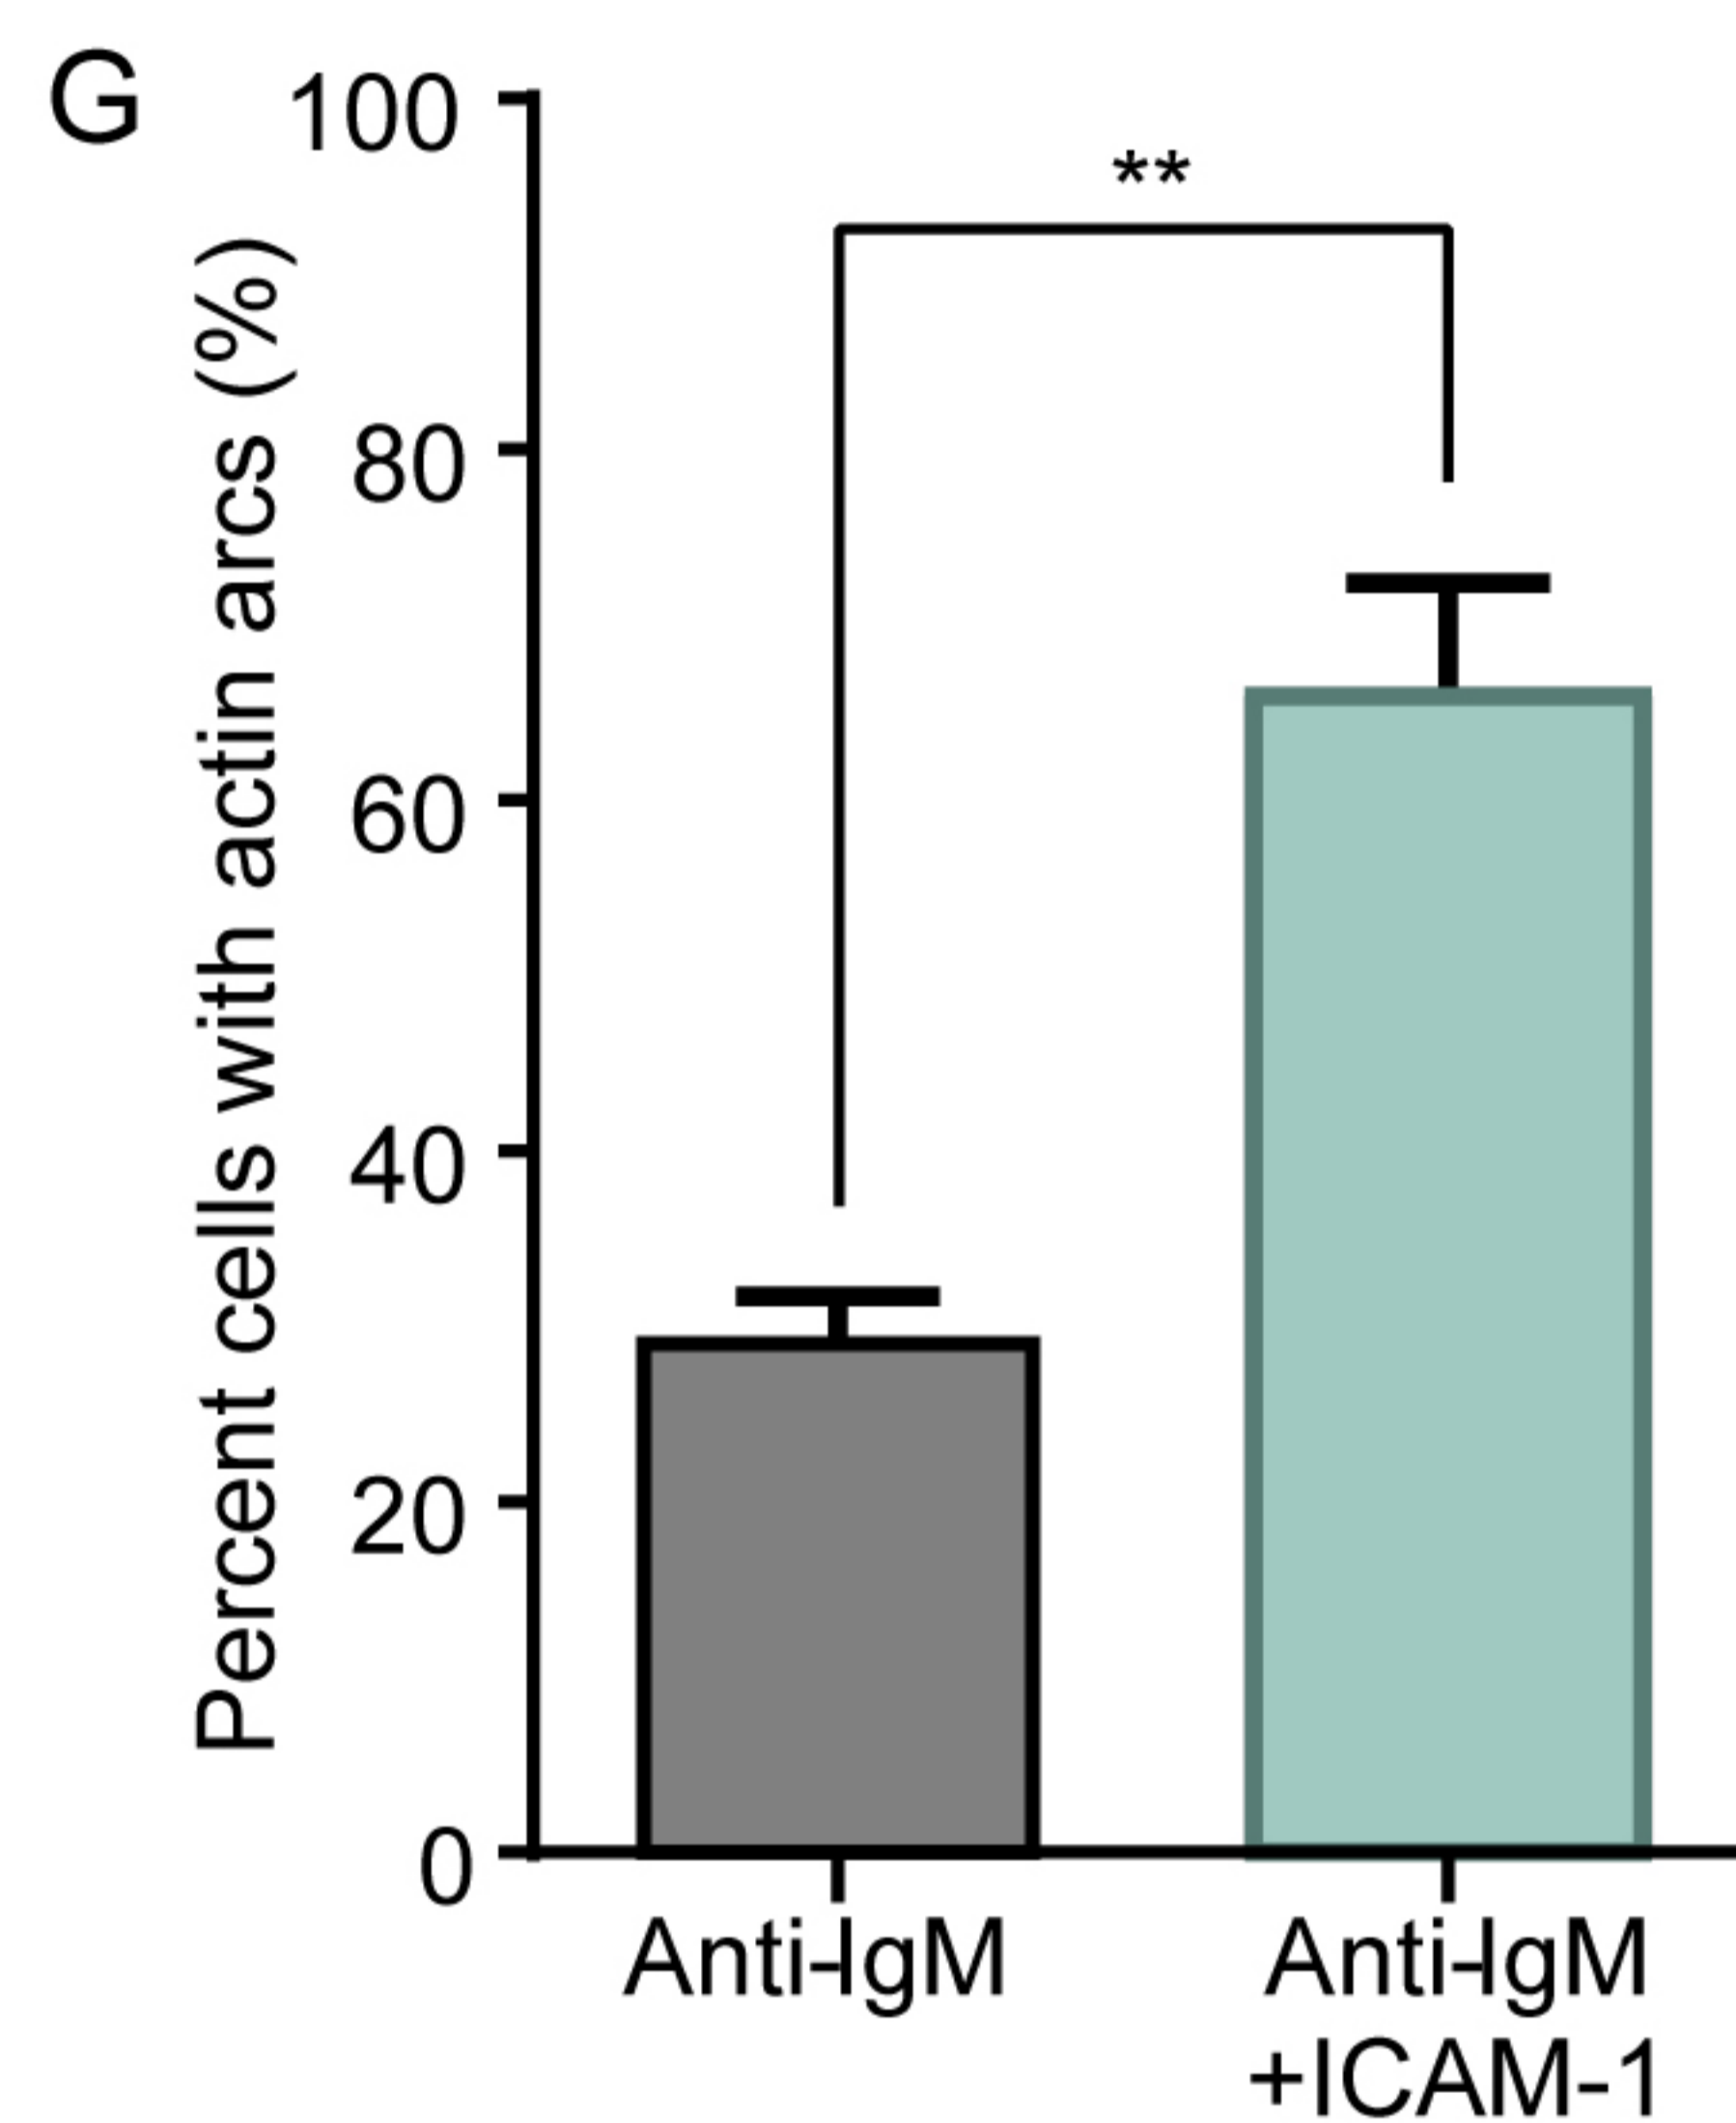

bioRxiv preprint doi: <https://doi.org/10.1101/2021.08.12.456133>; this version posted August 13, 2021. The copyright holder for this preprint (which was not certified by peer review) is the author/funder. This article is a US Government work. It is not subject to copyright under 17 USC 105 and is also made available for use under a CC0 license.

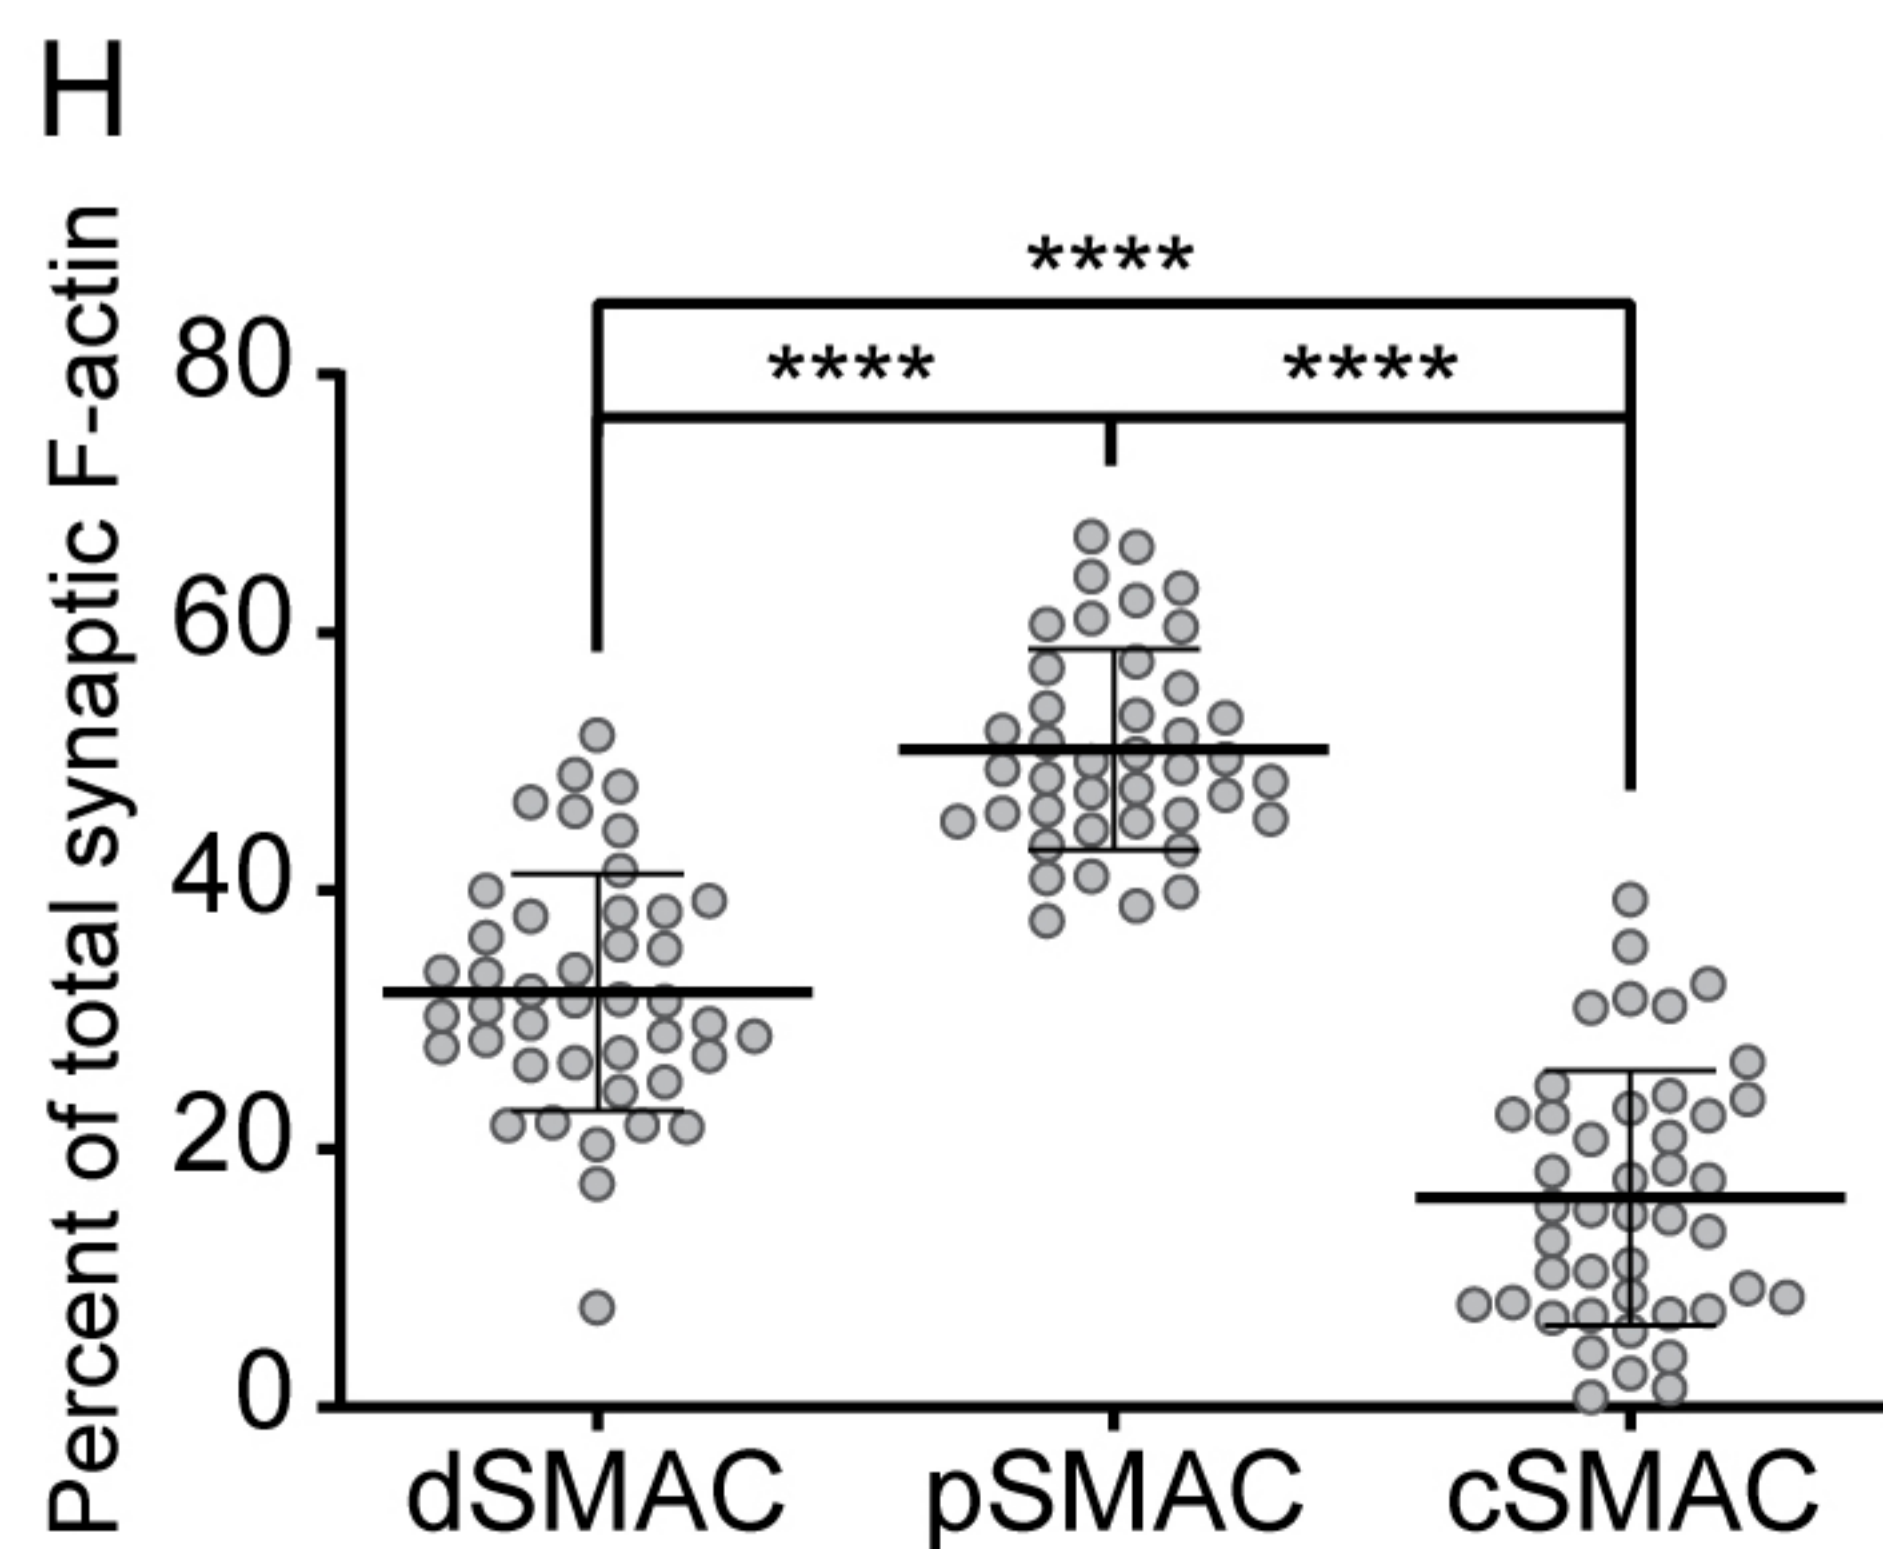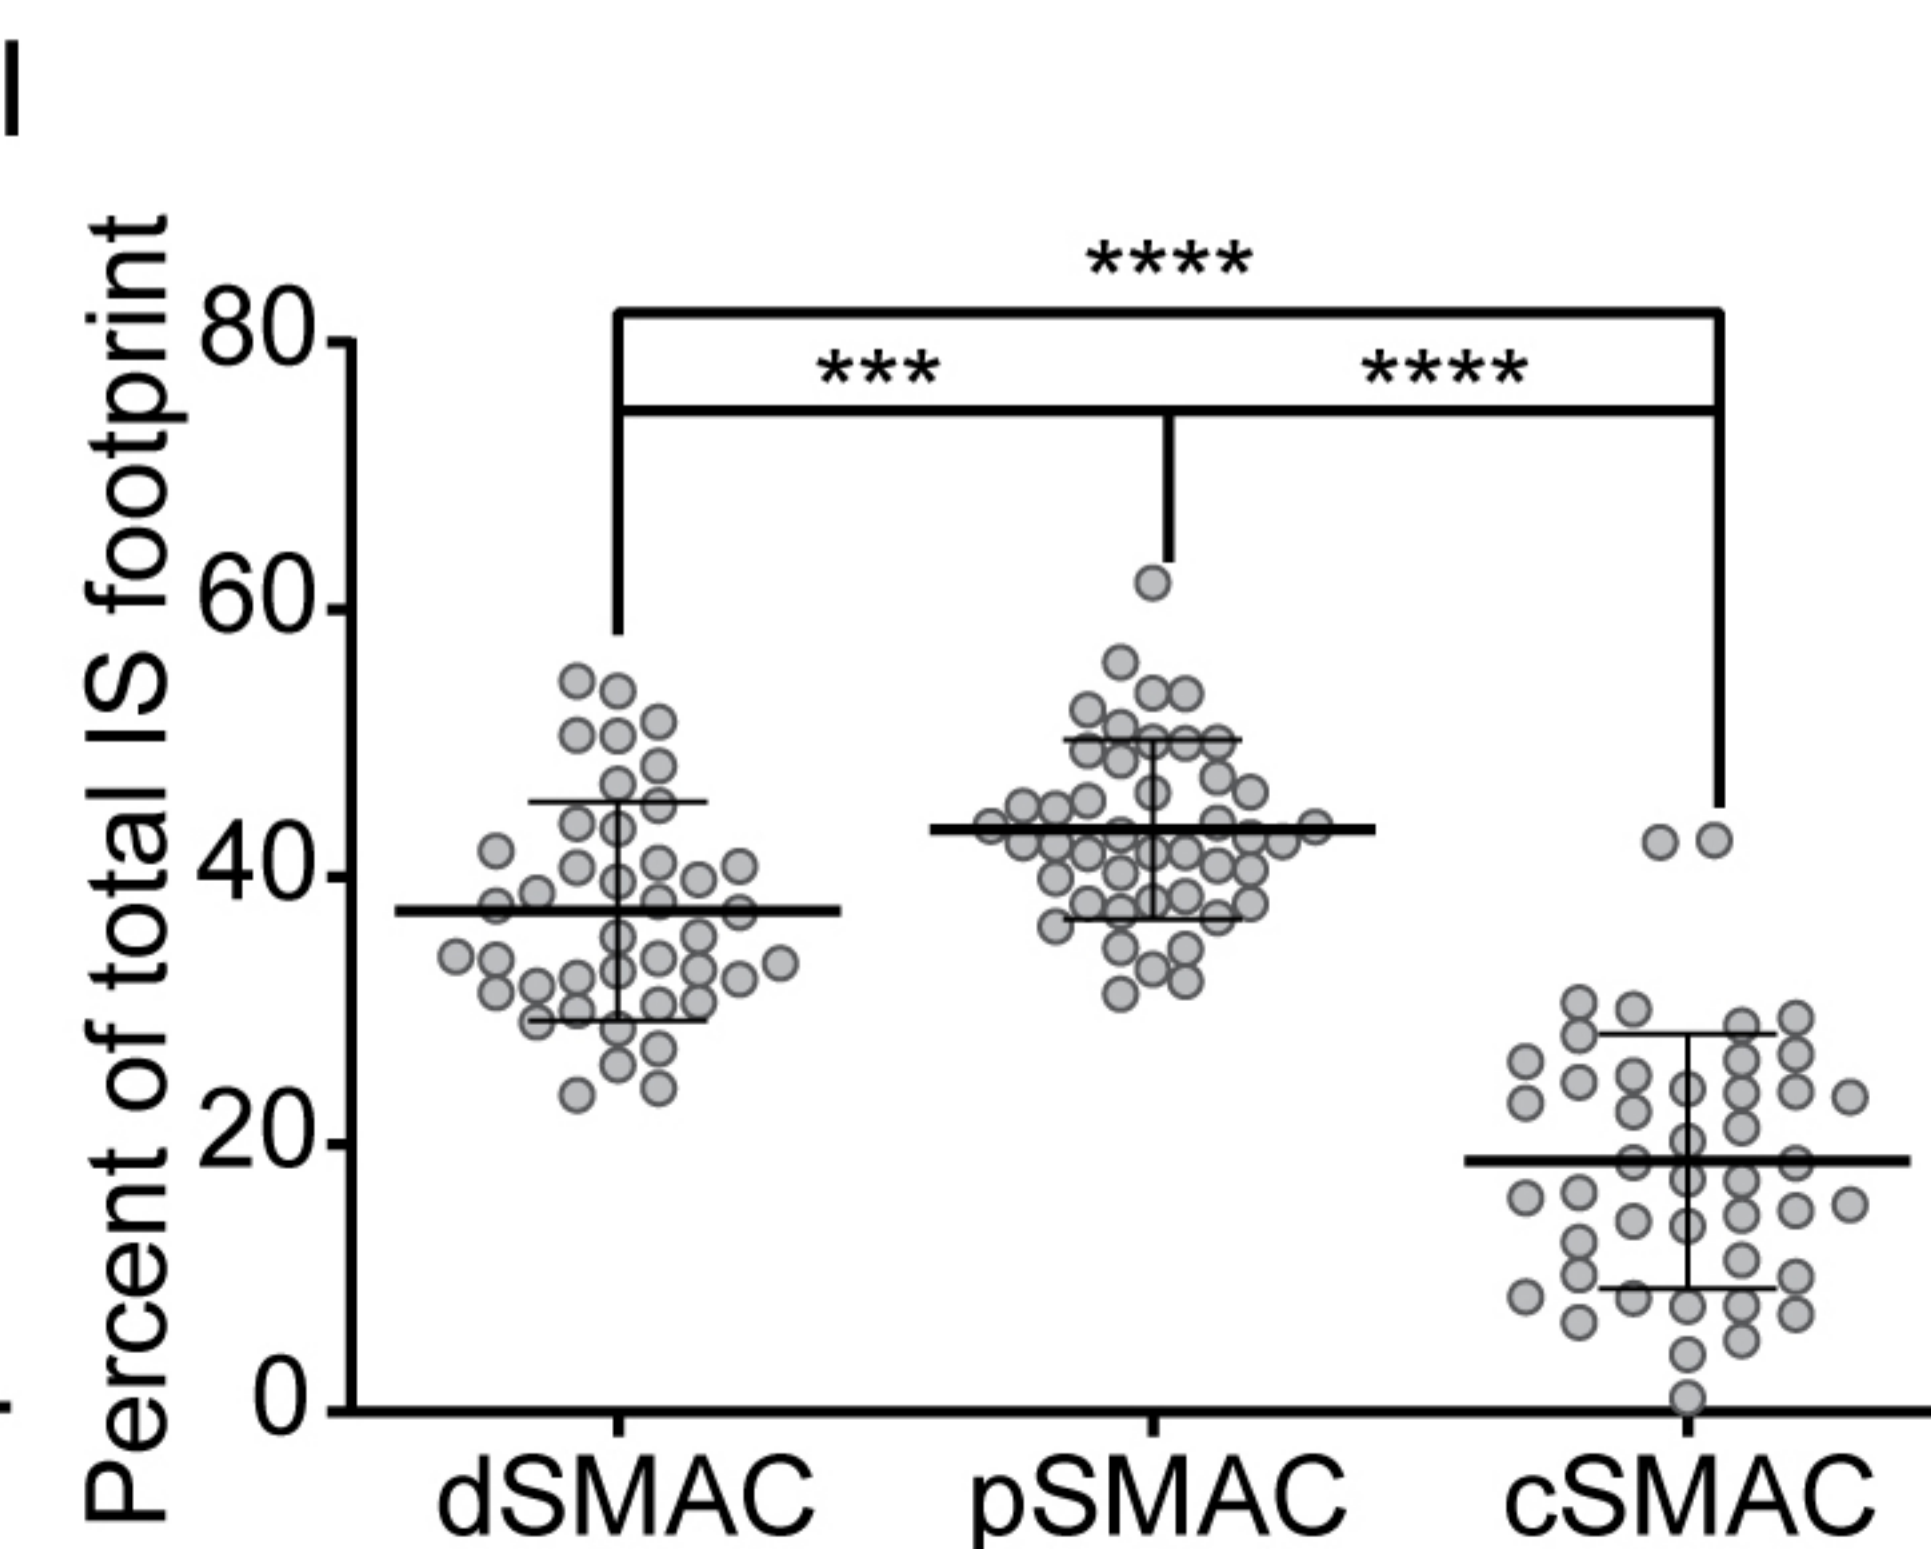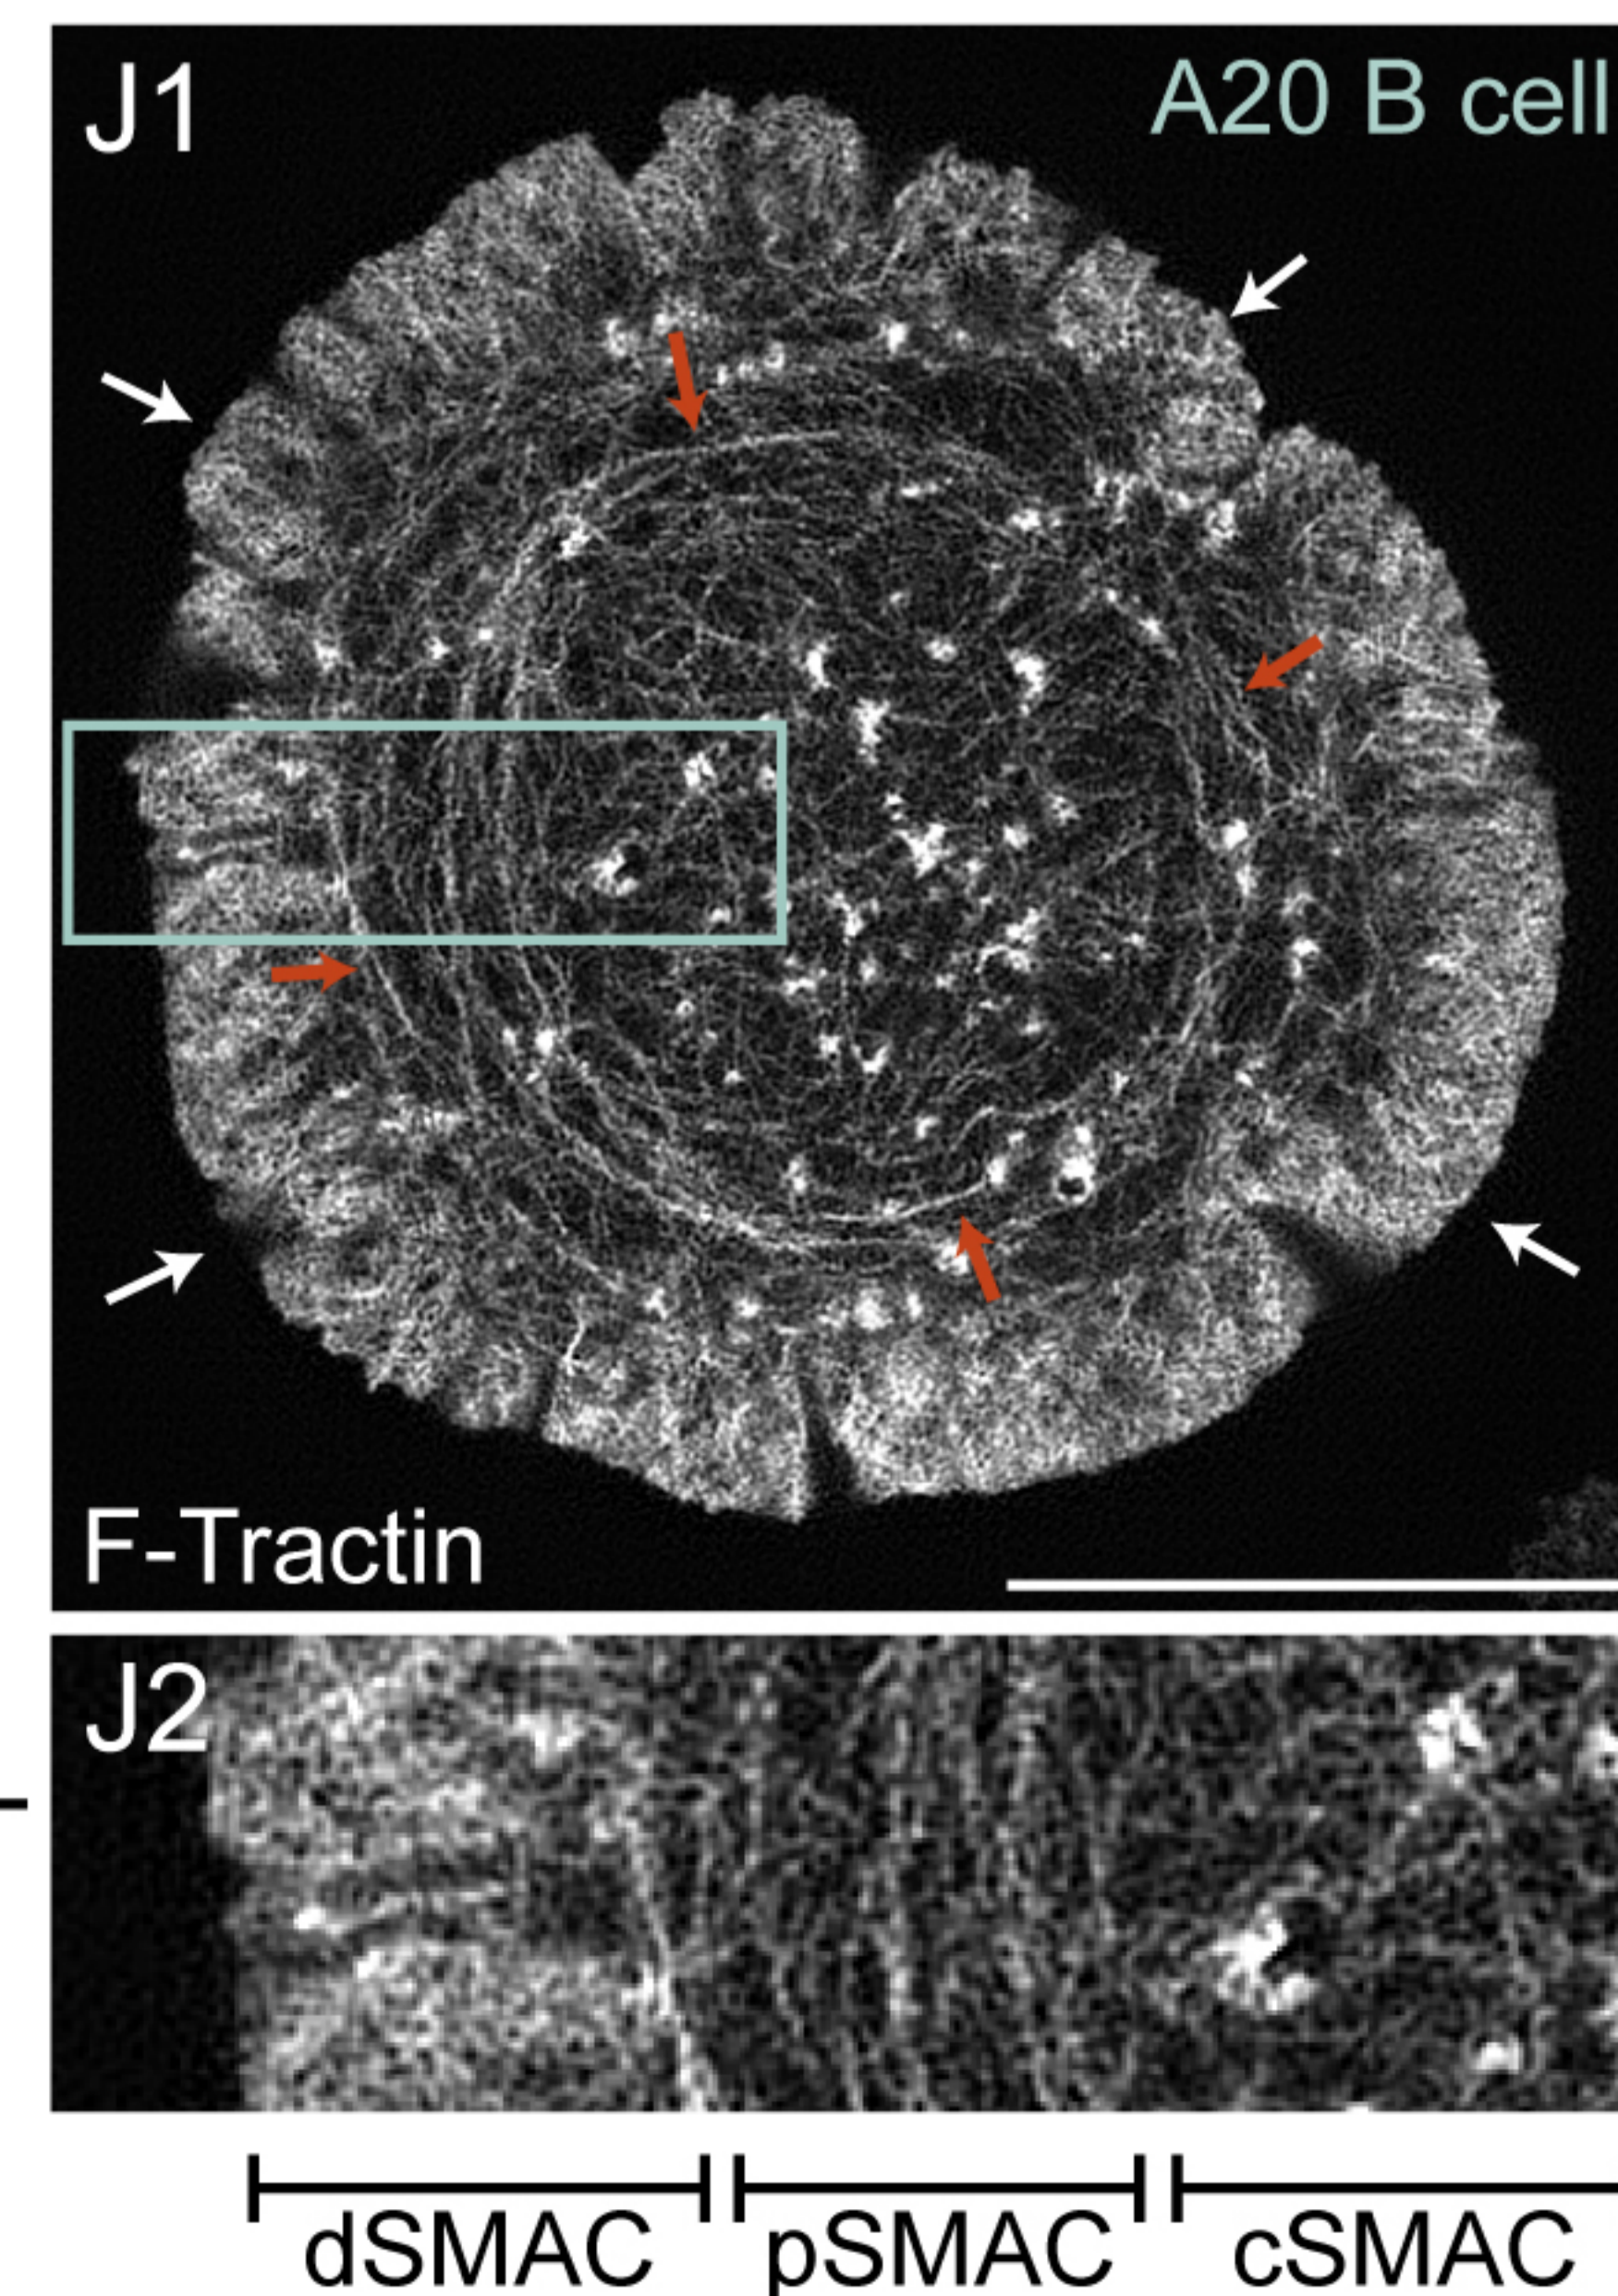



Figure 2

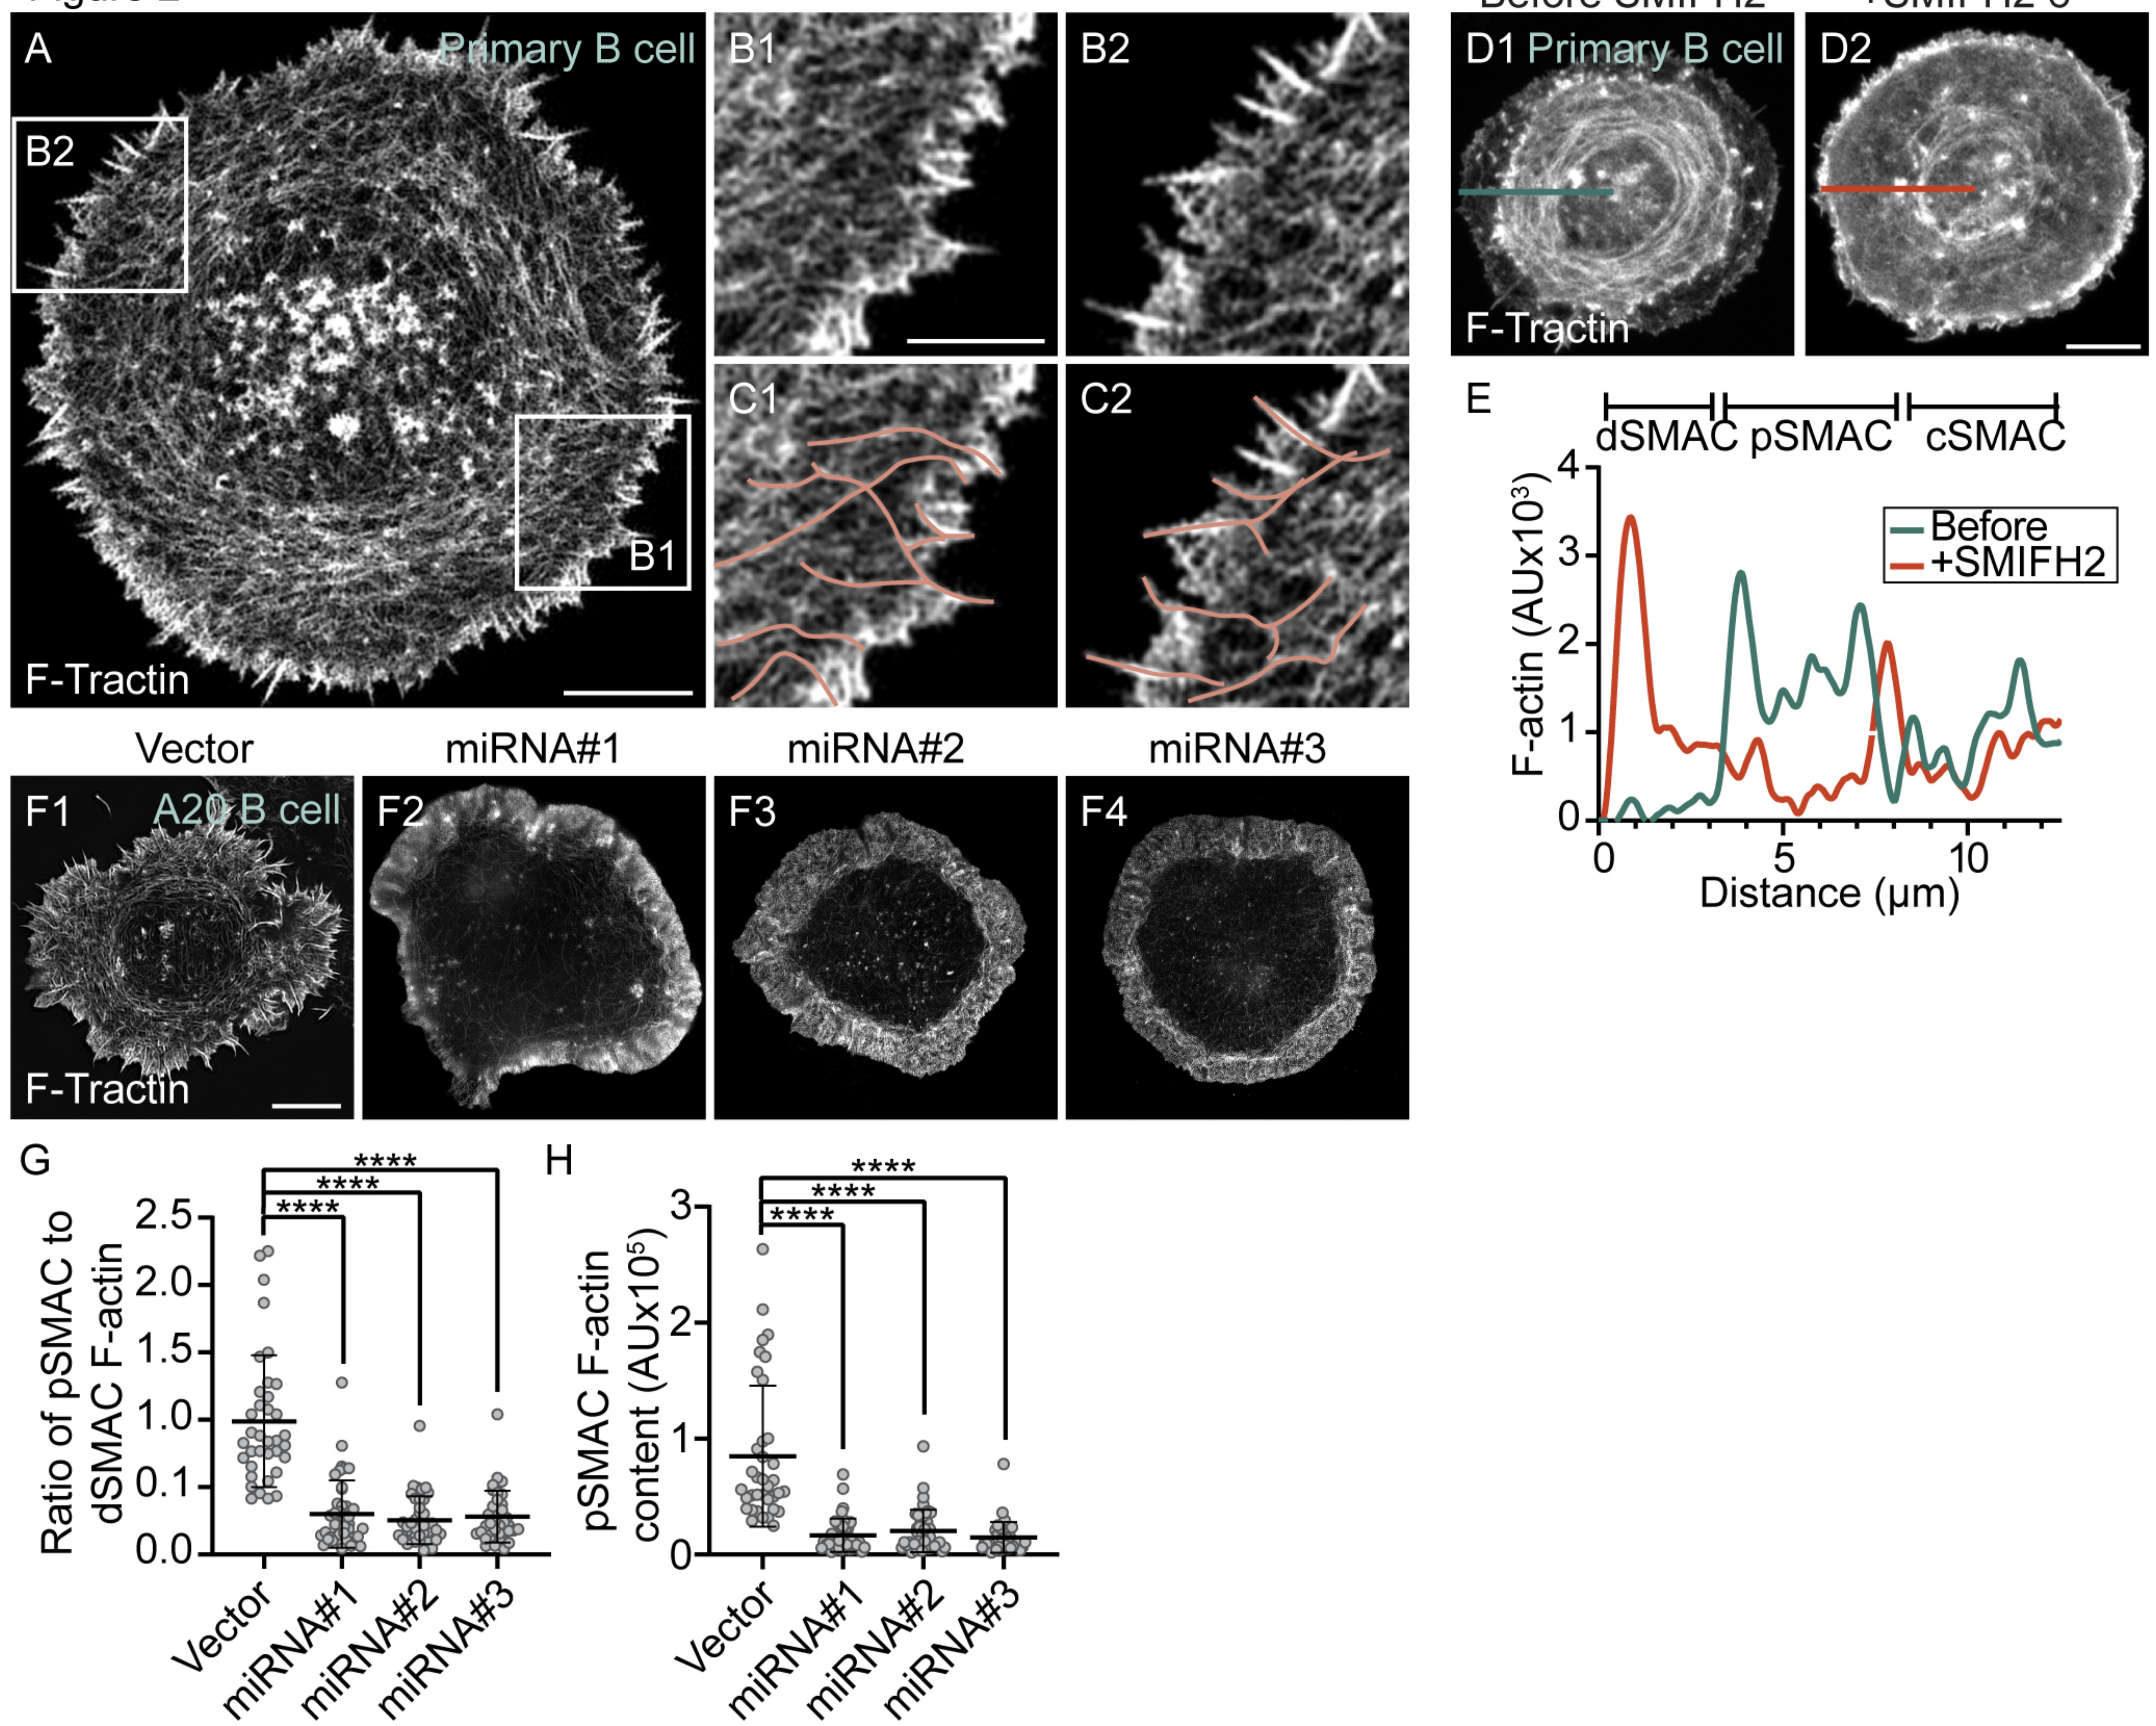



Figure 3

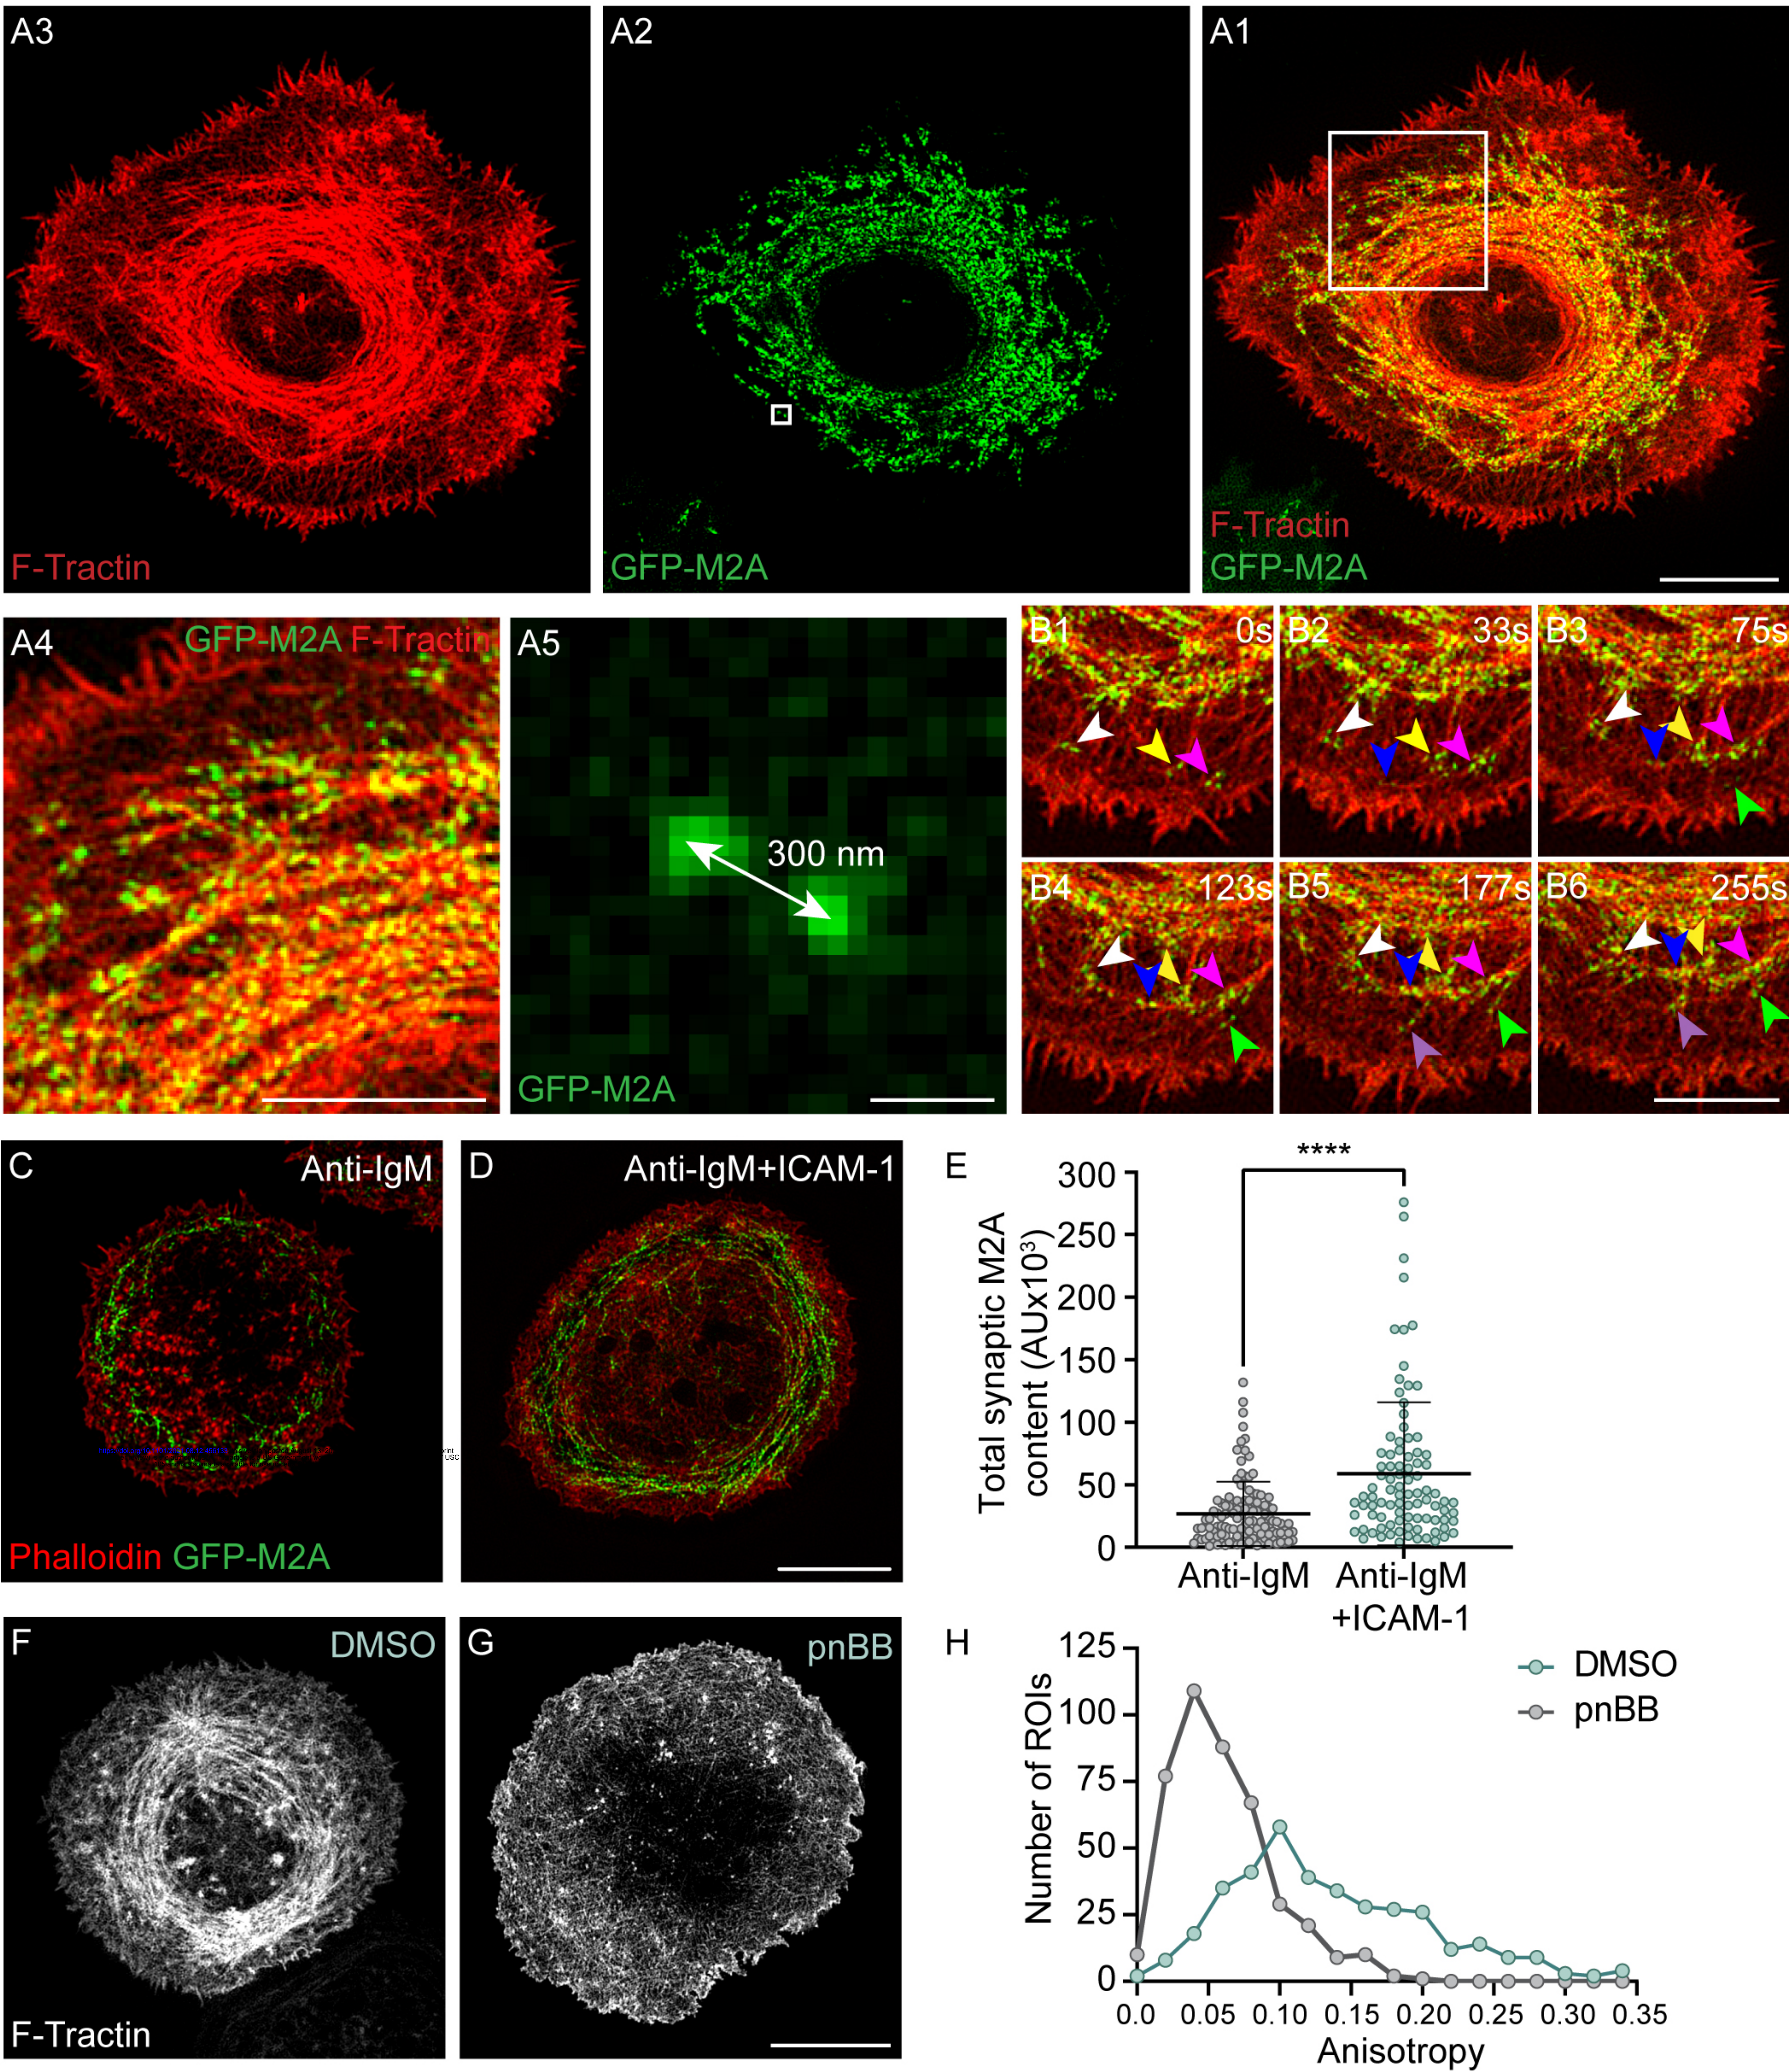



Figure 4

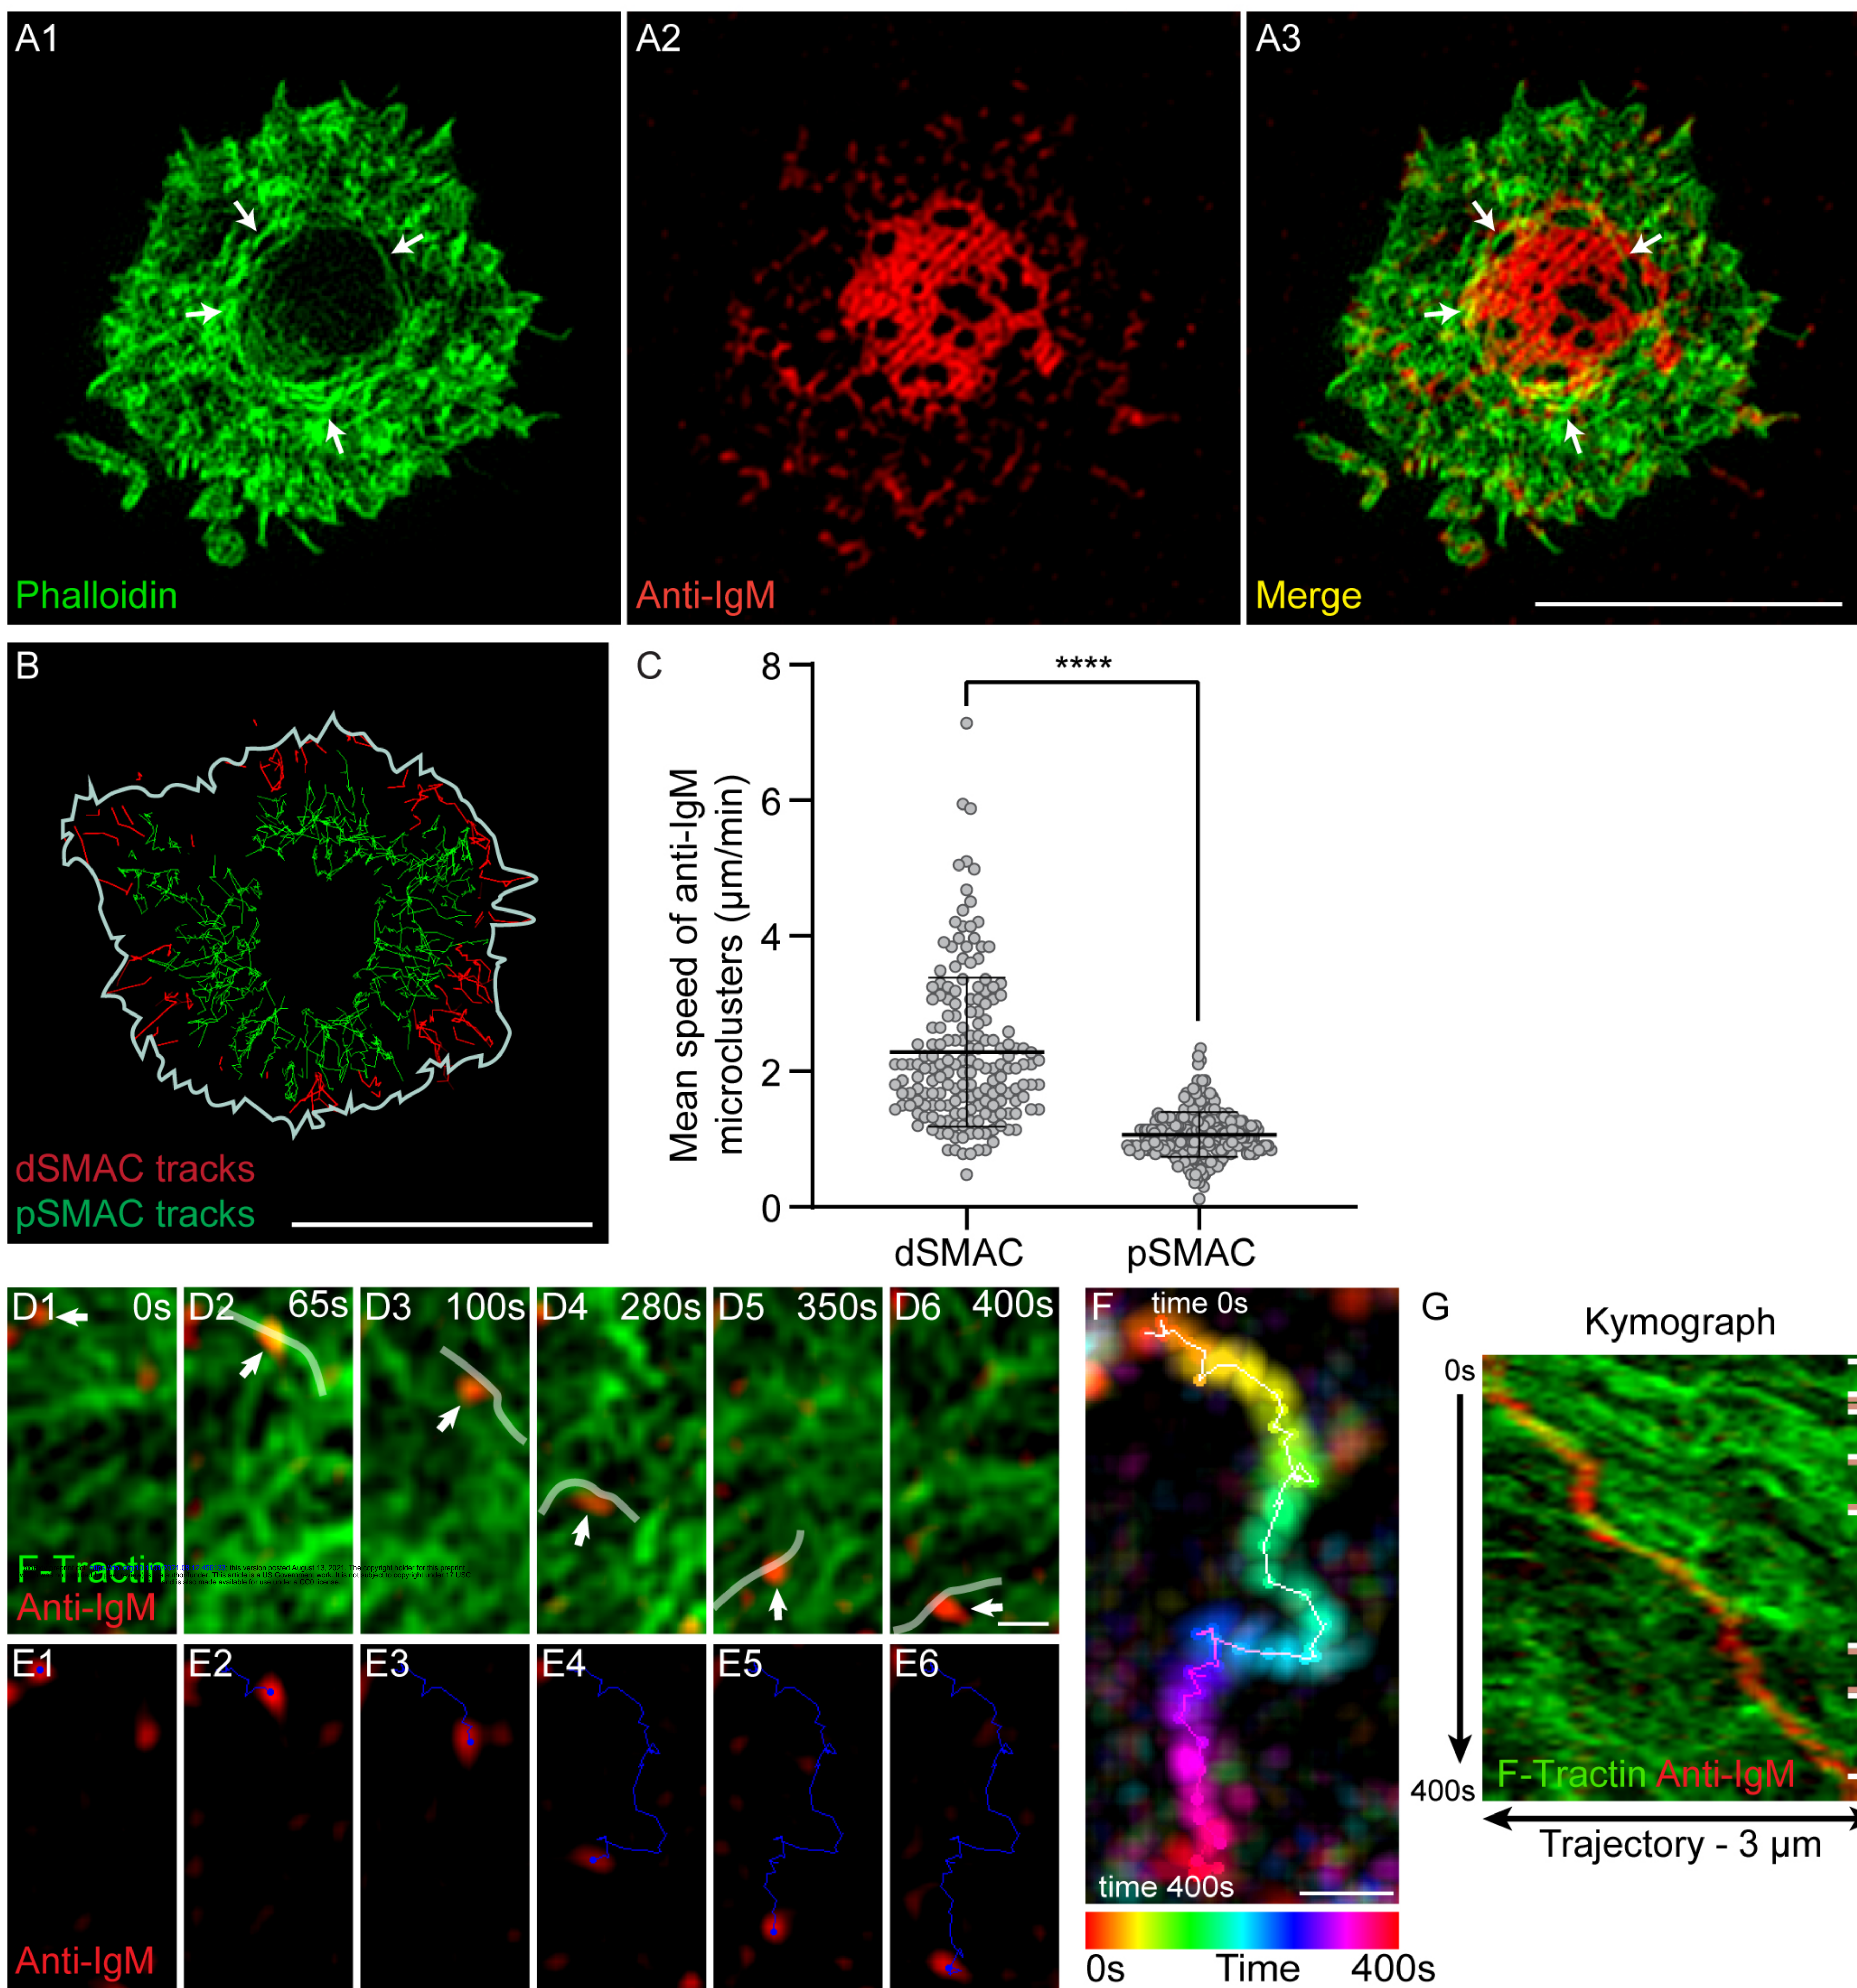



Figure 5 Limiting Anti-IgM + ICAM-1 + DMSO

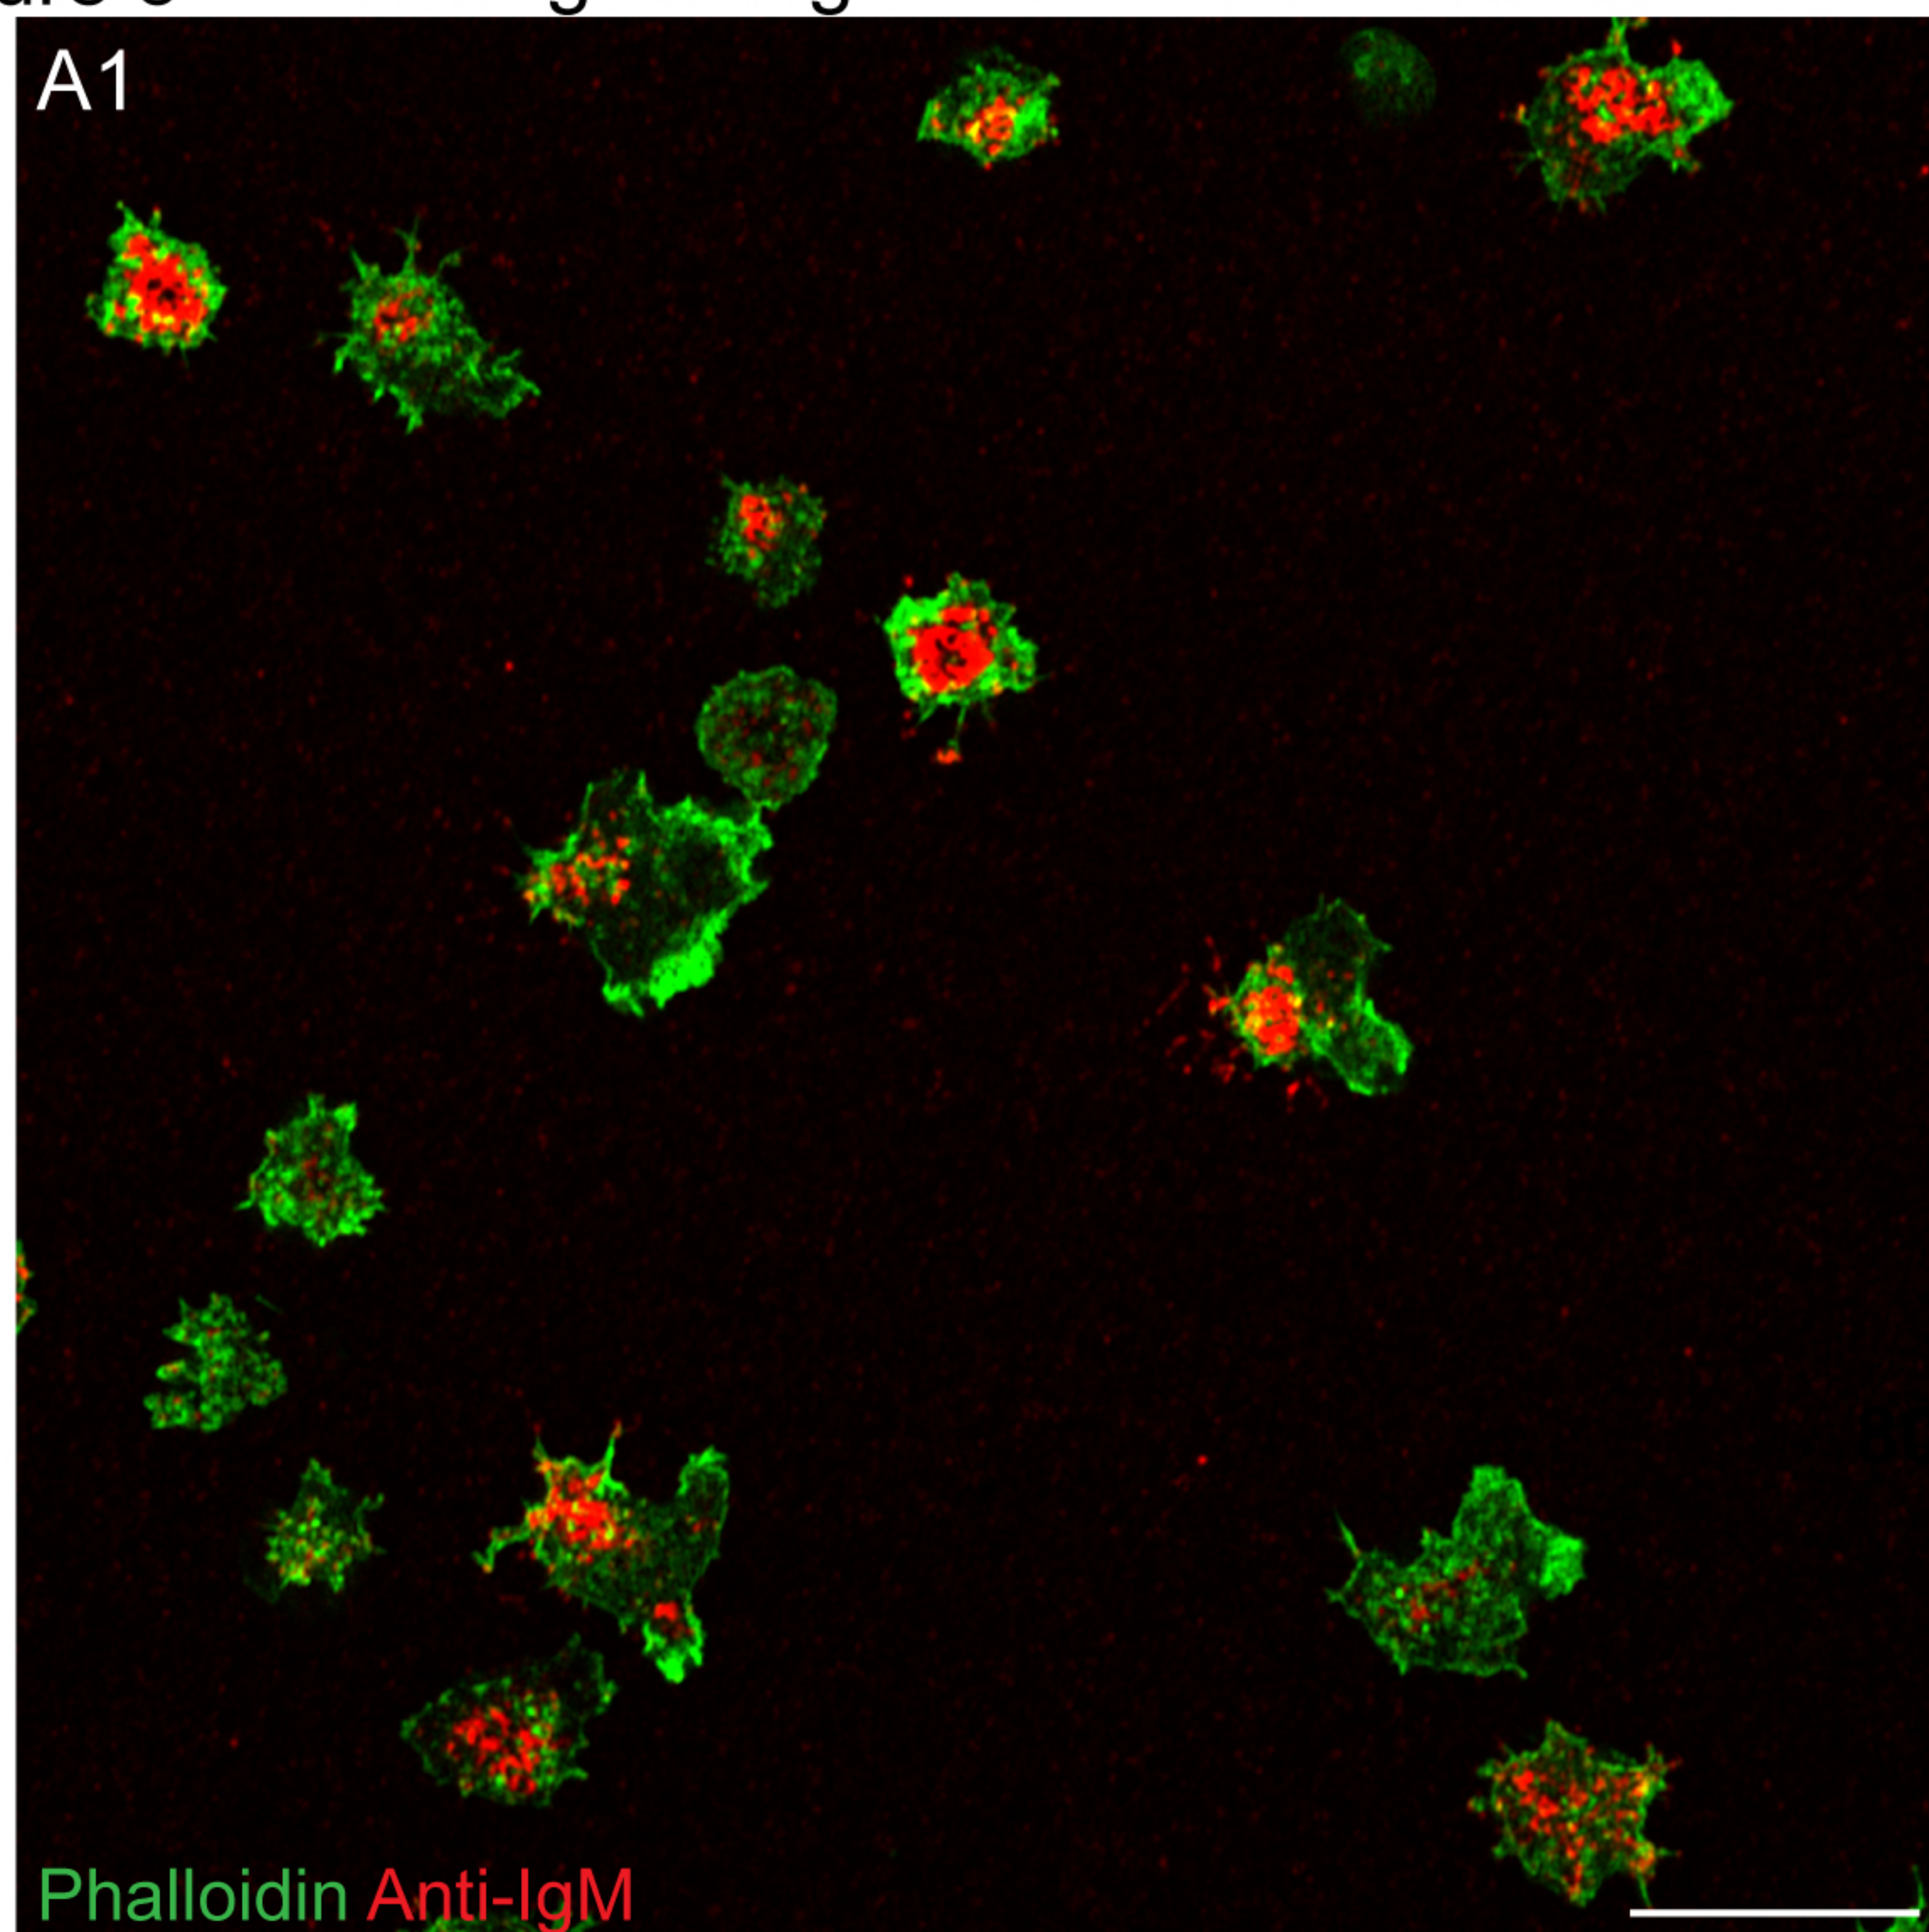

Limiting Anti-IgM + ICAM-1 + pnBB

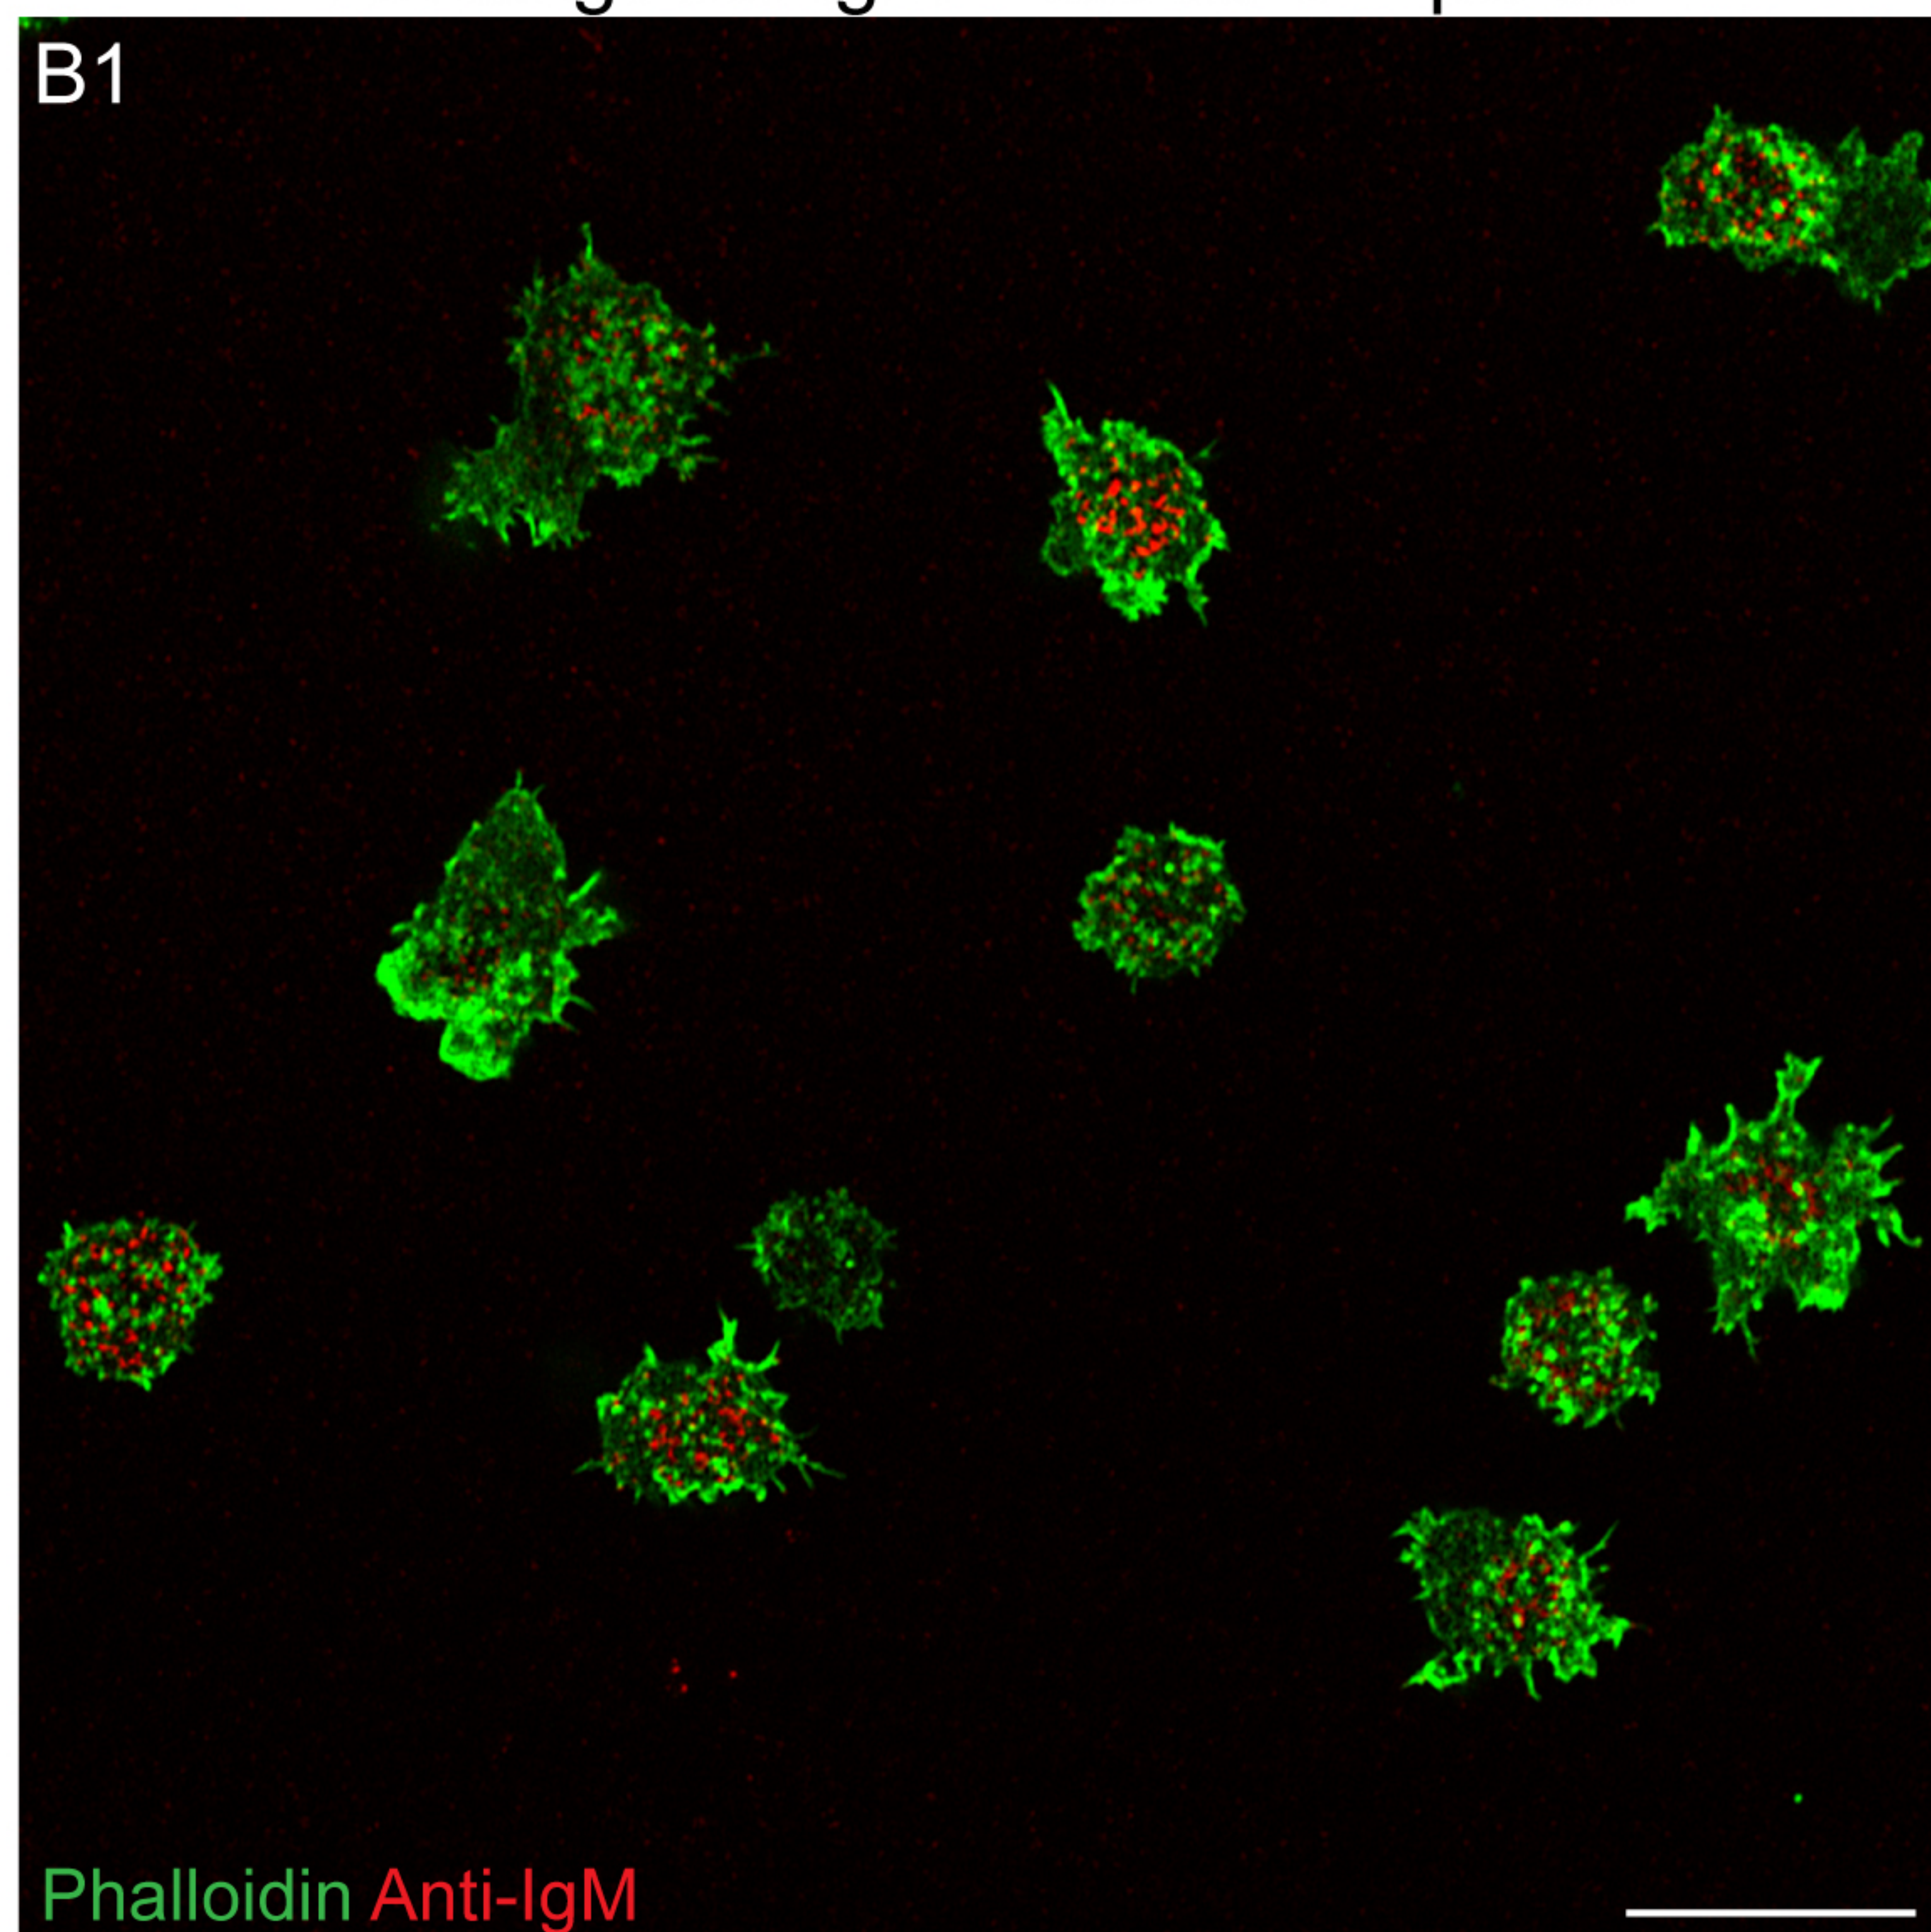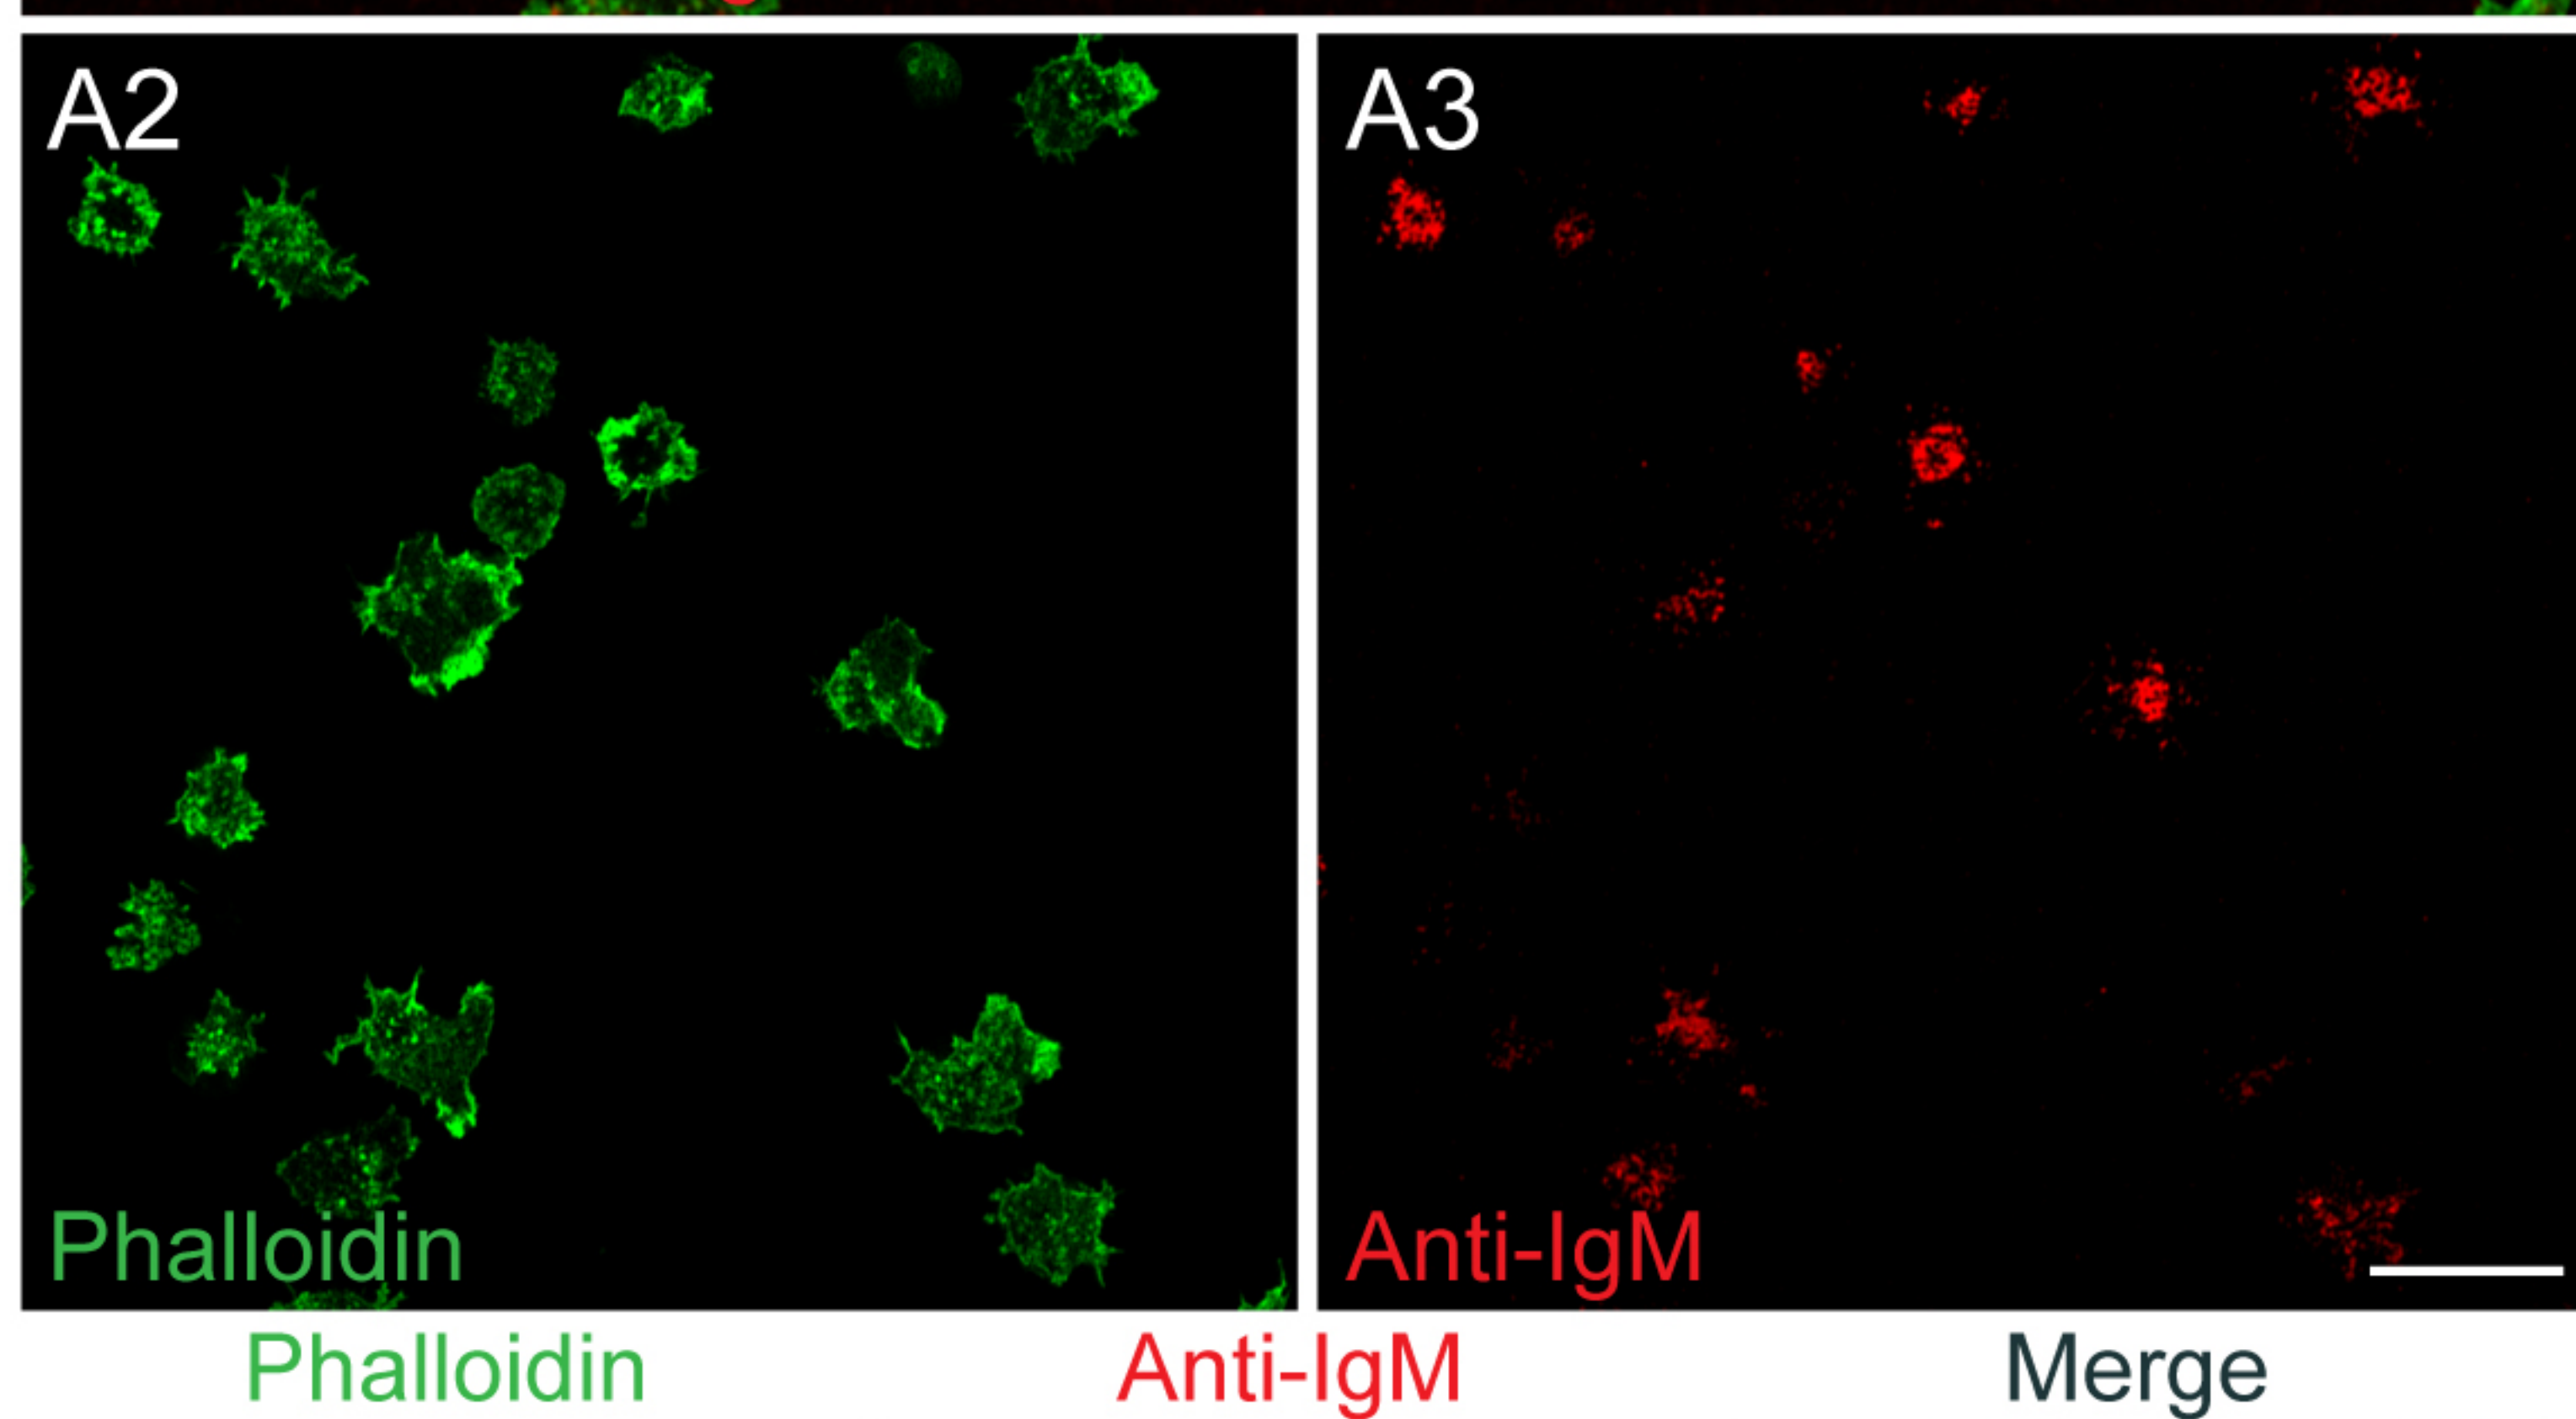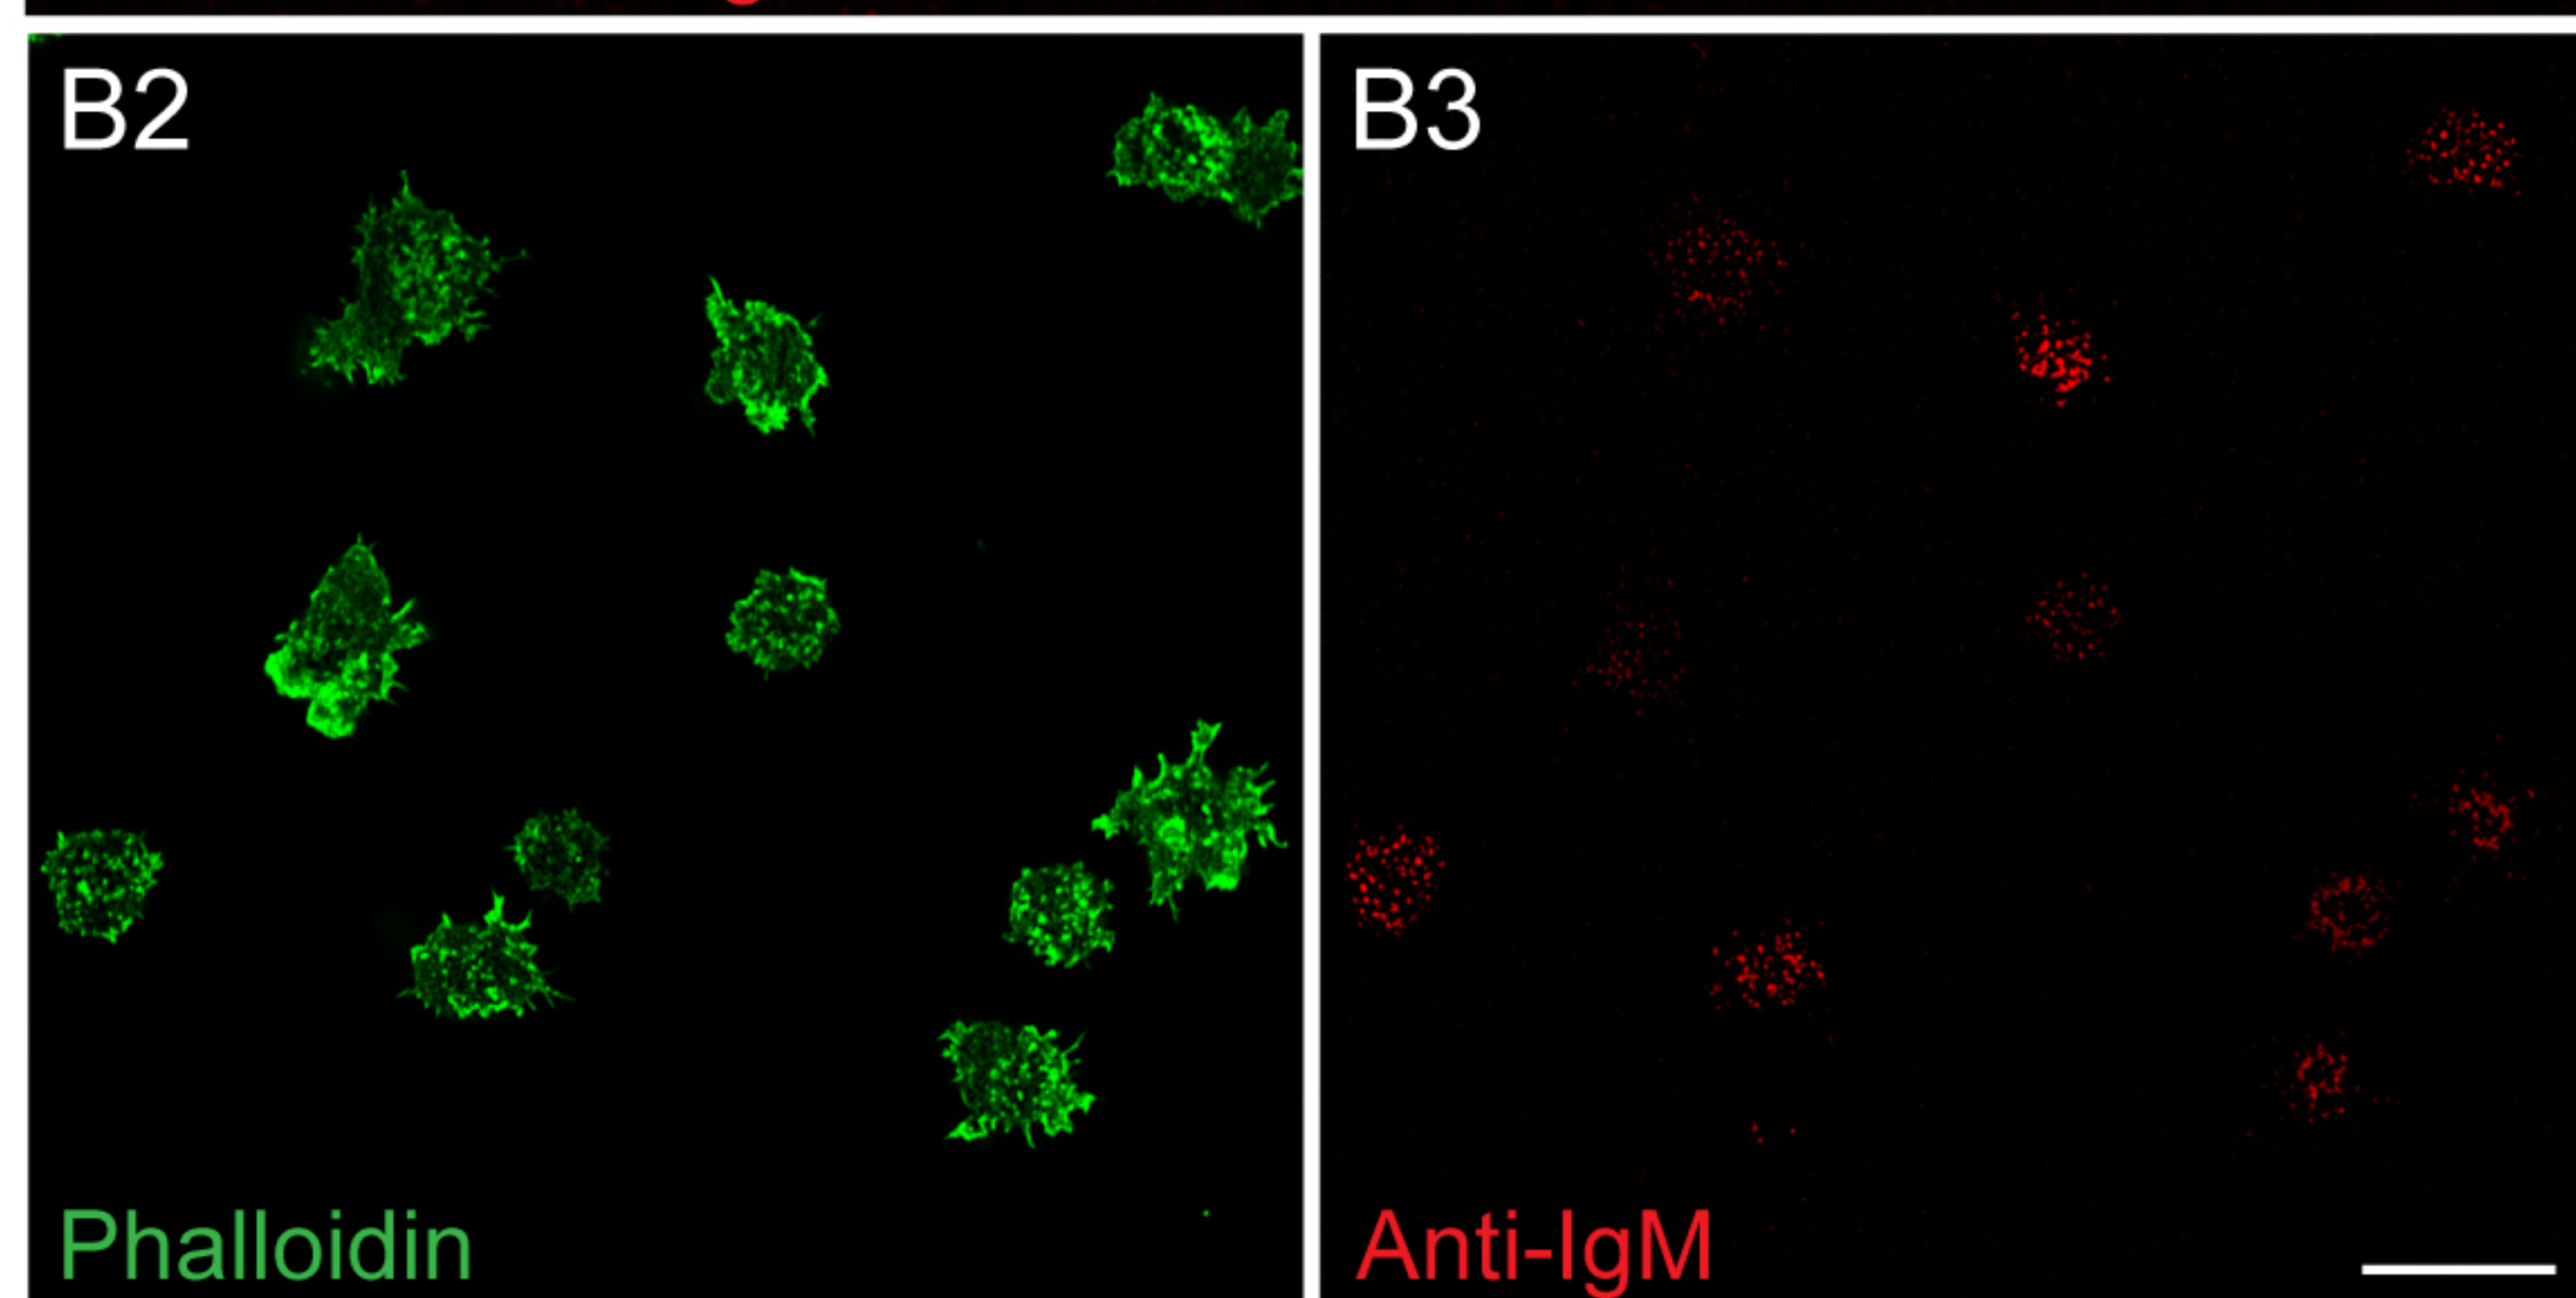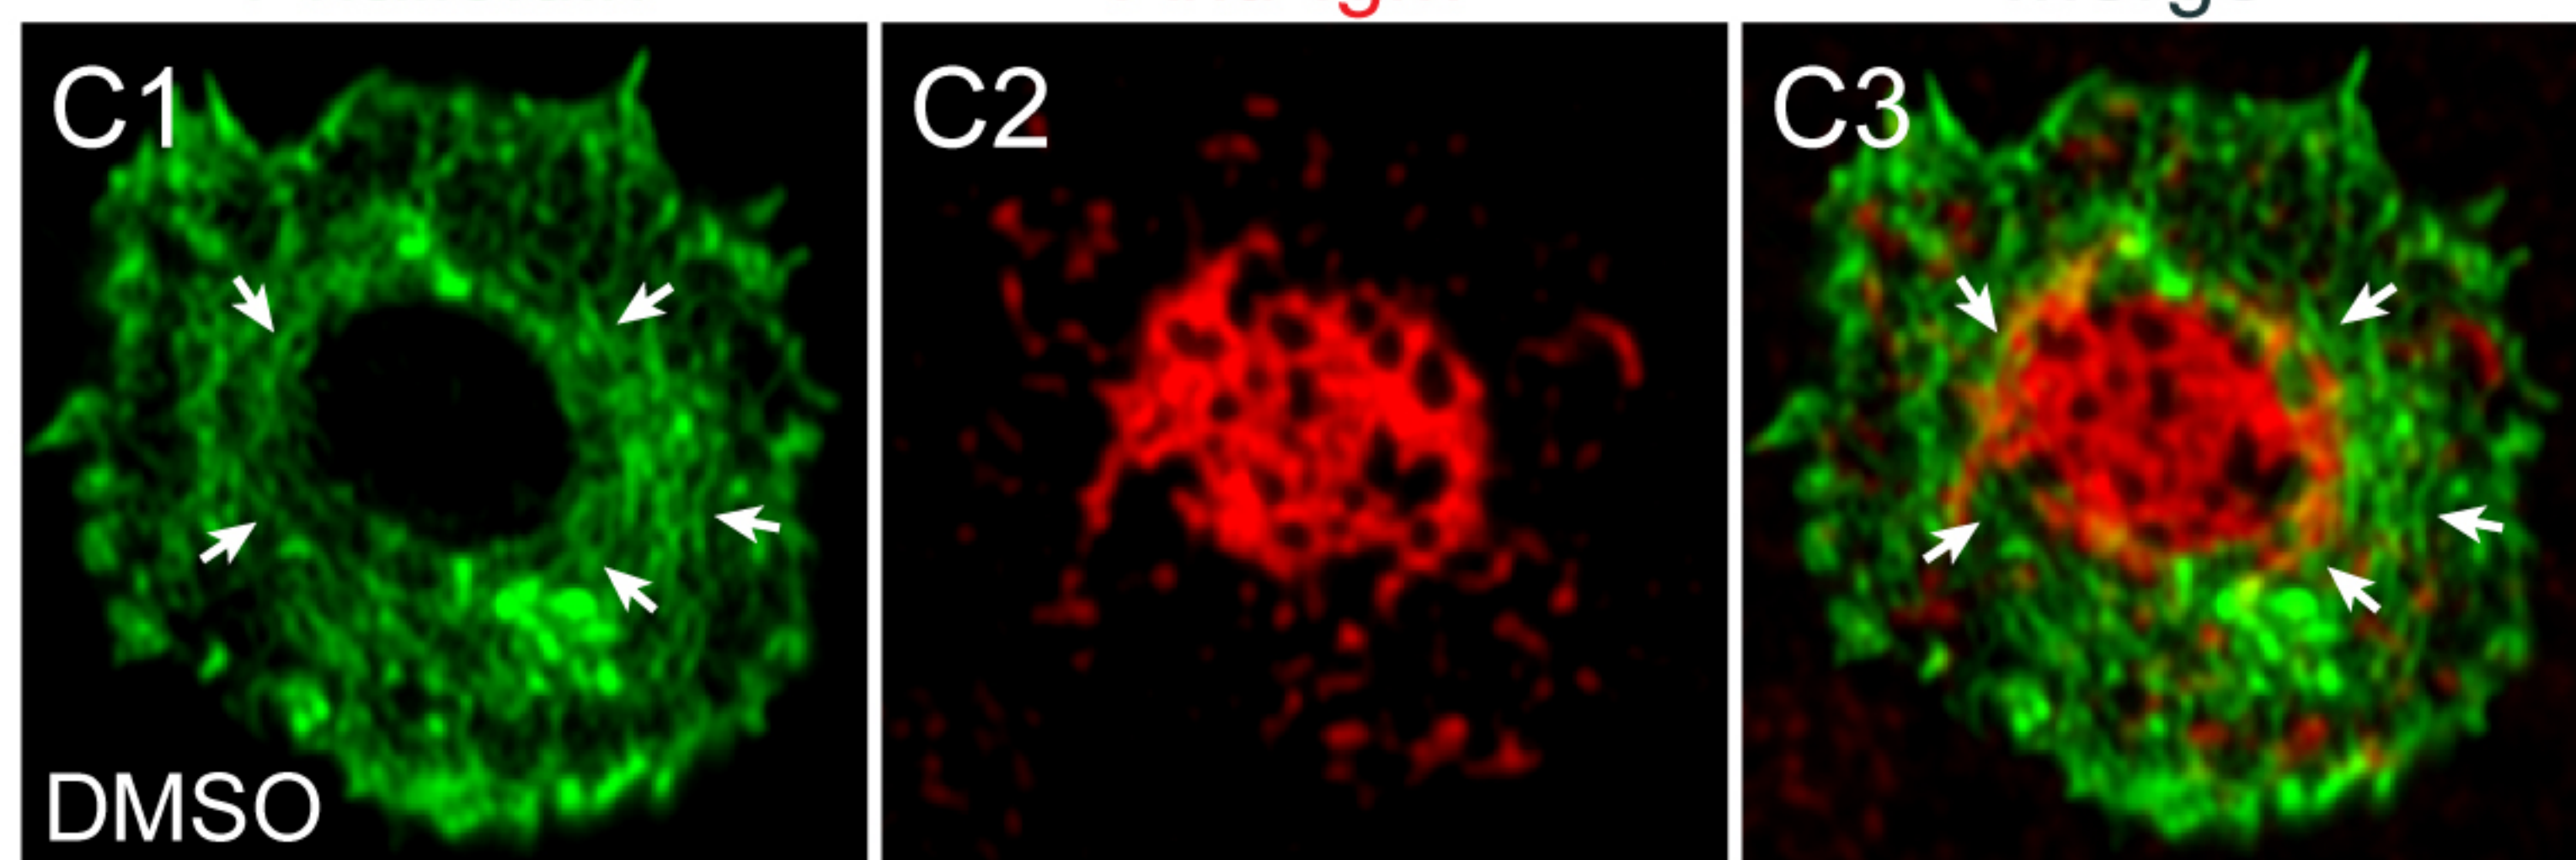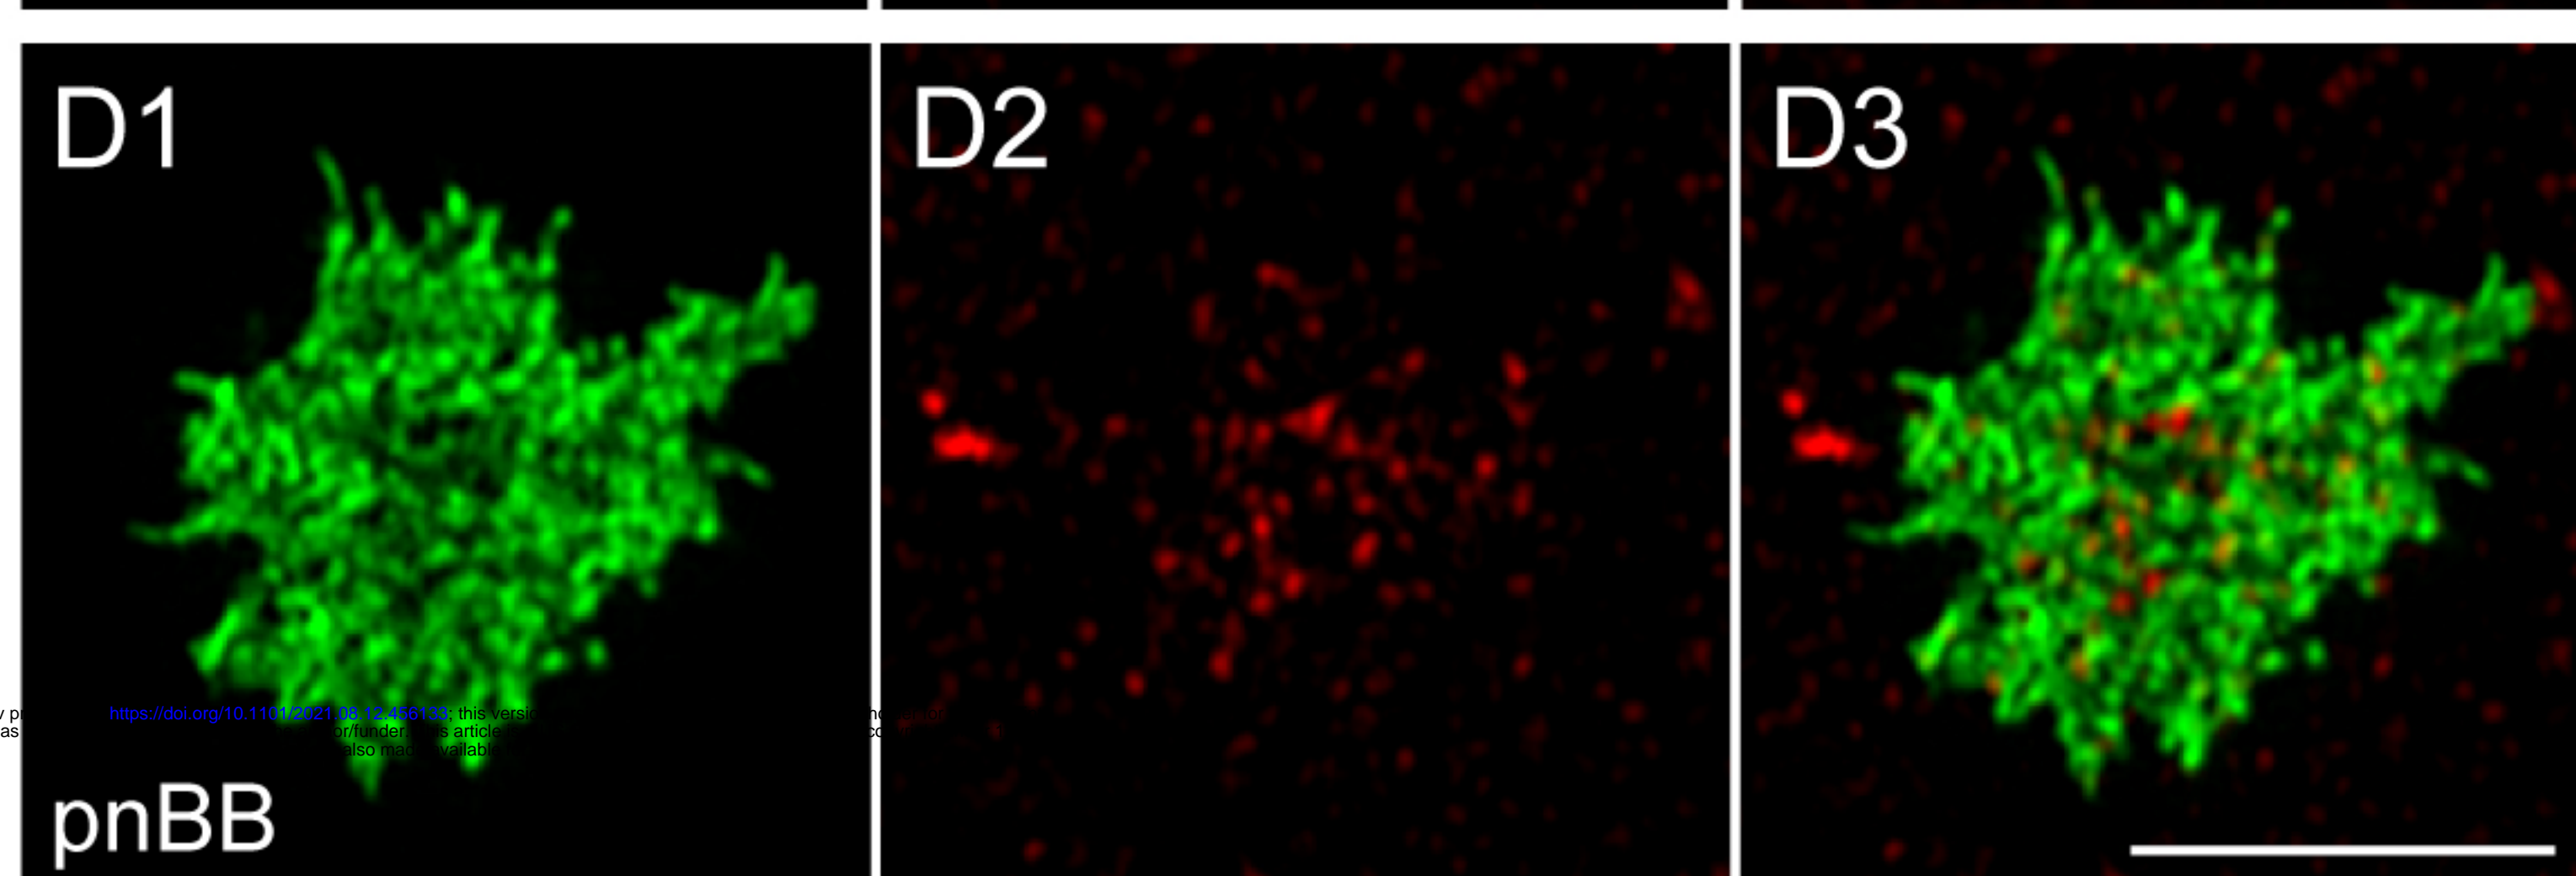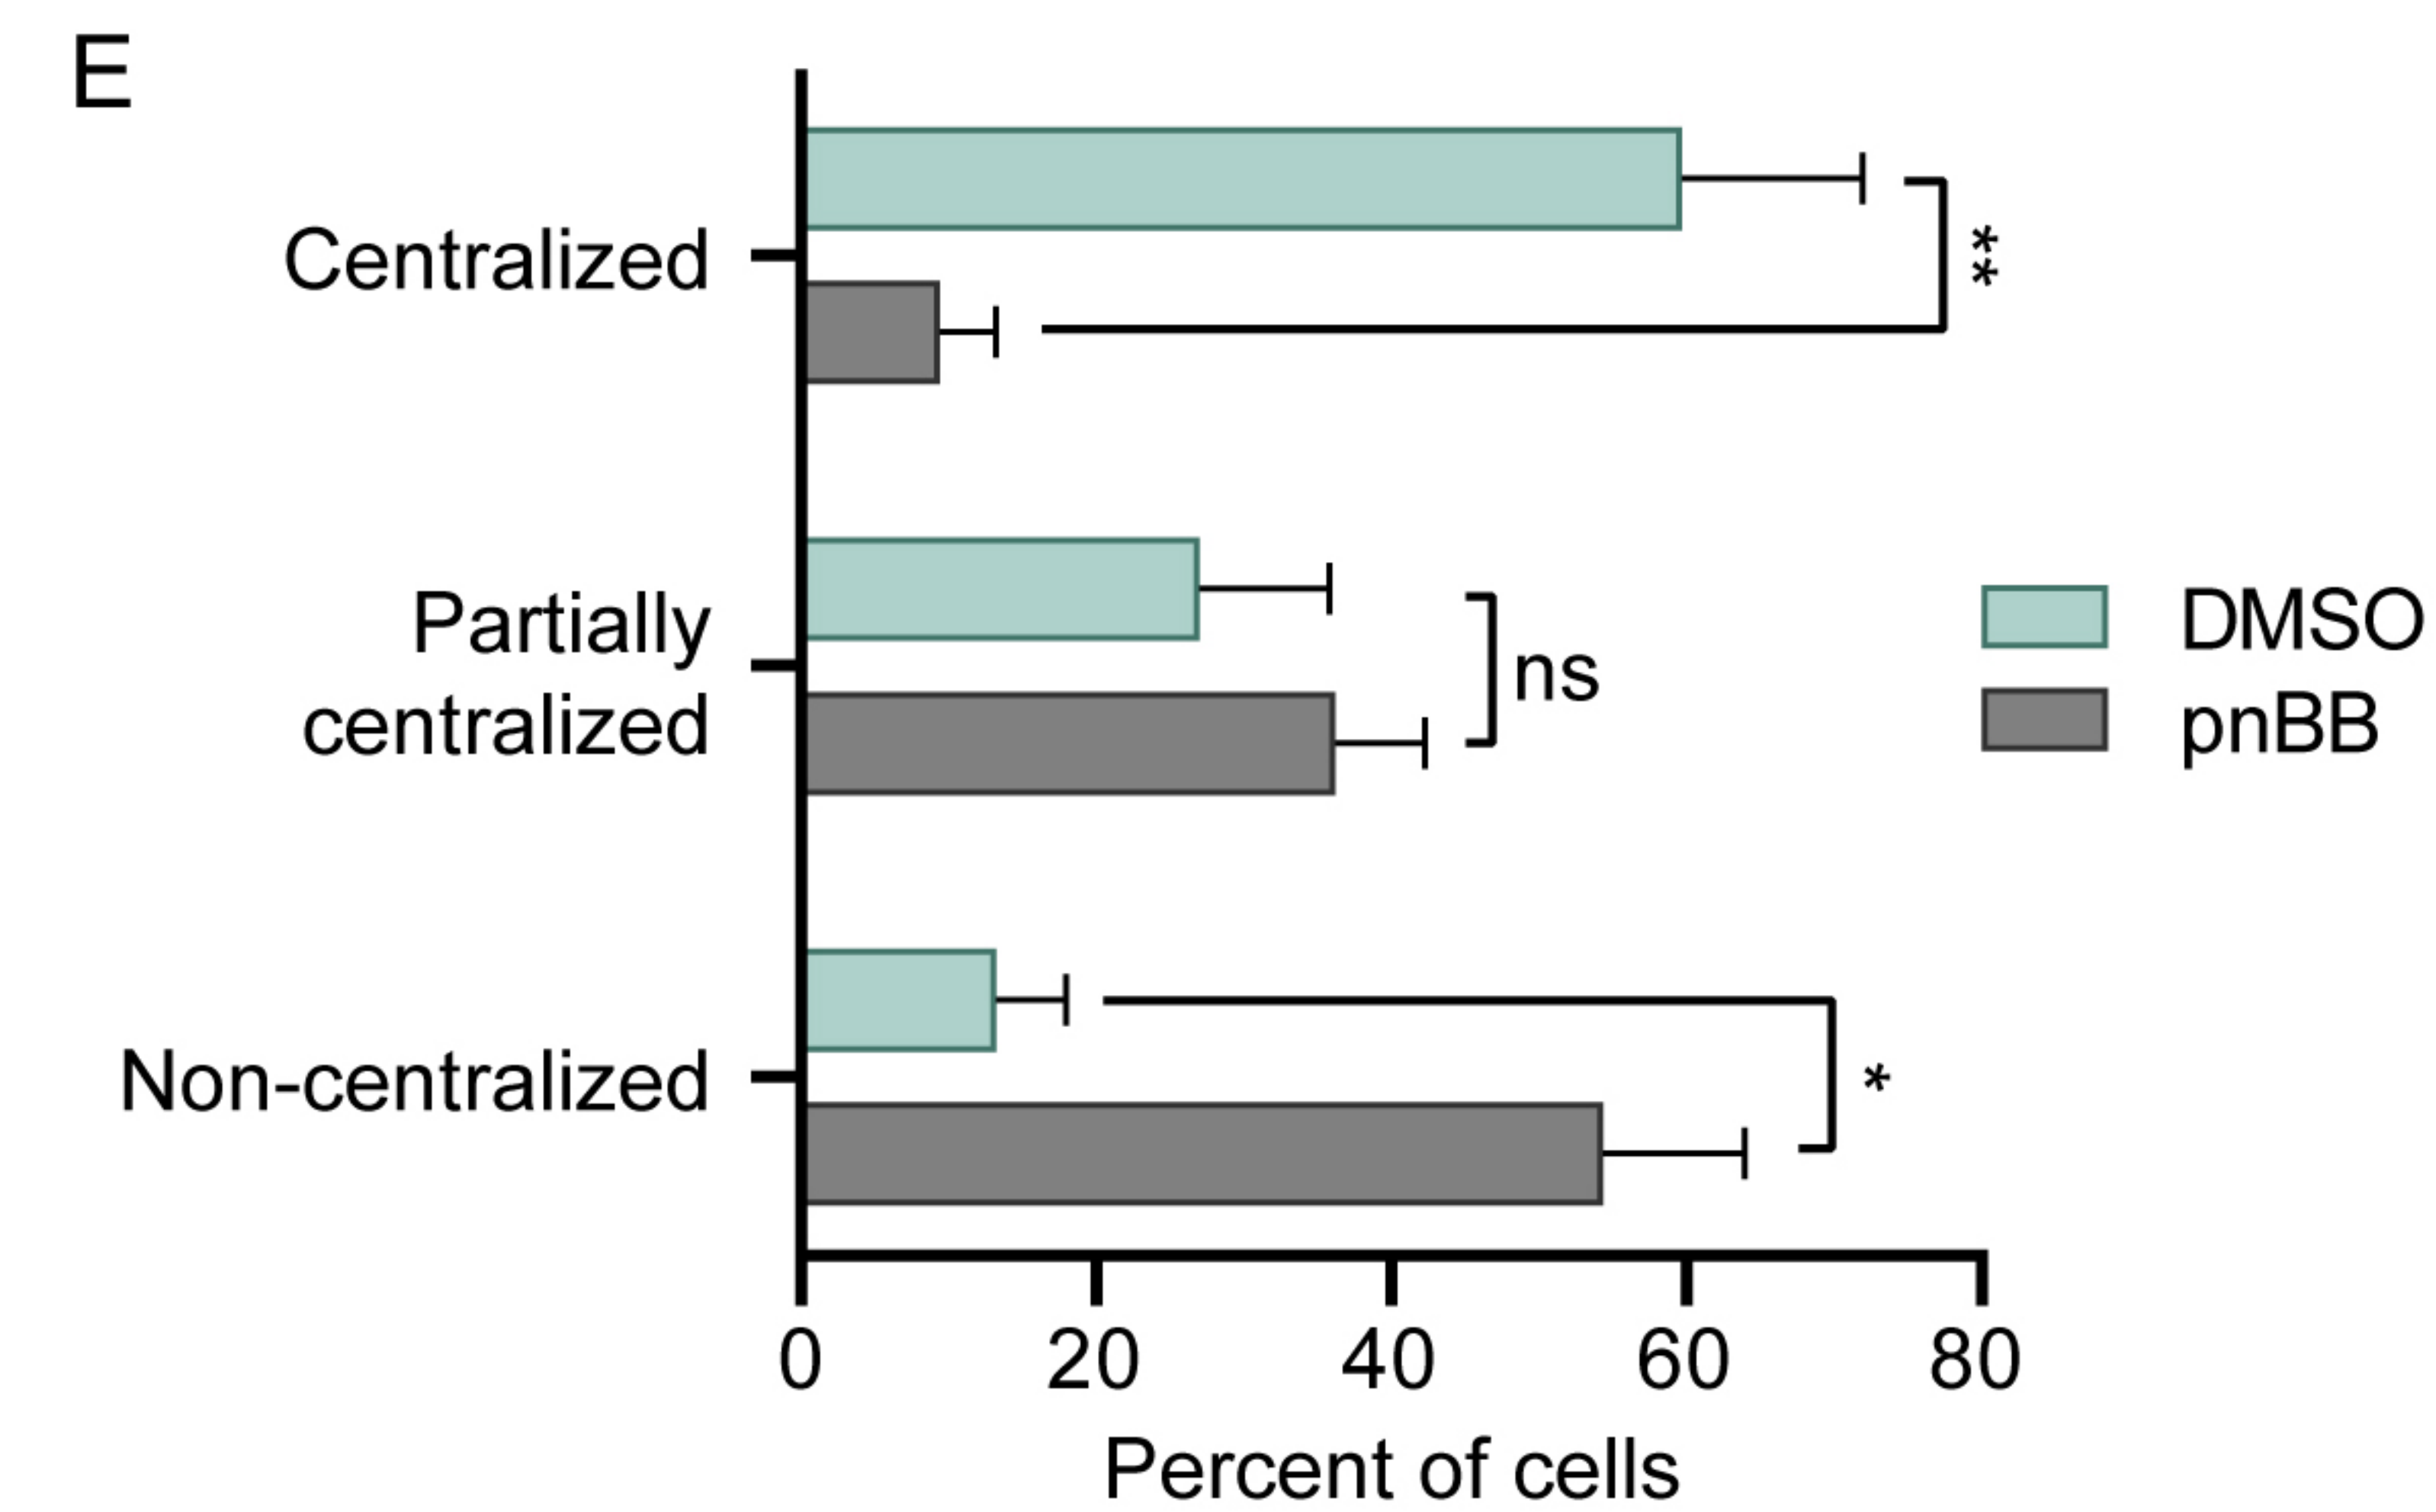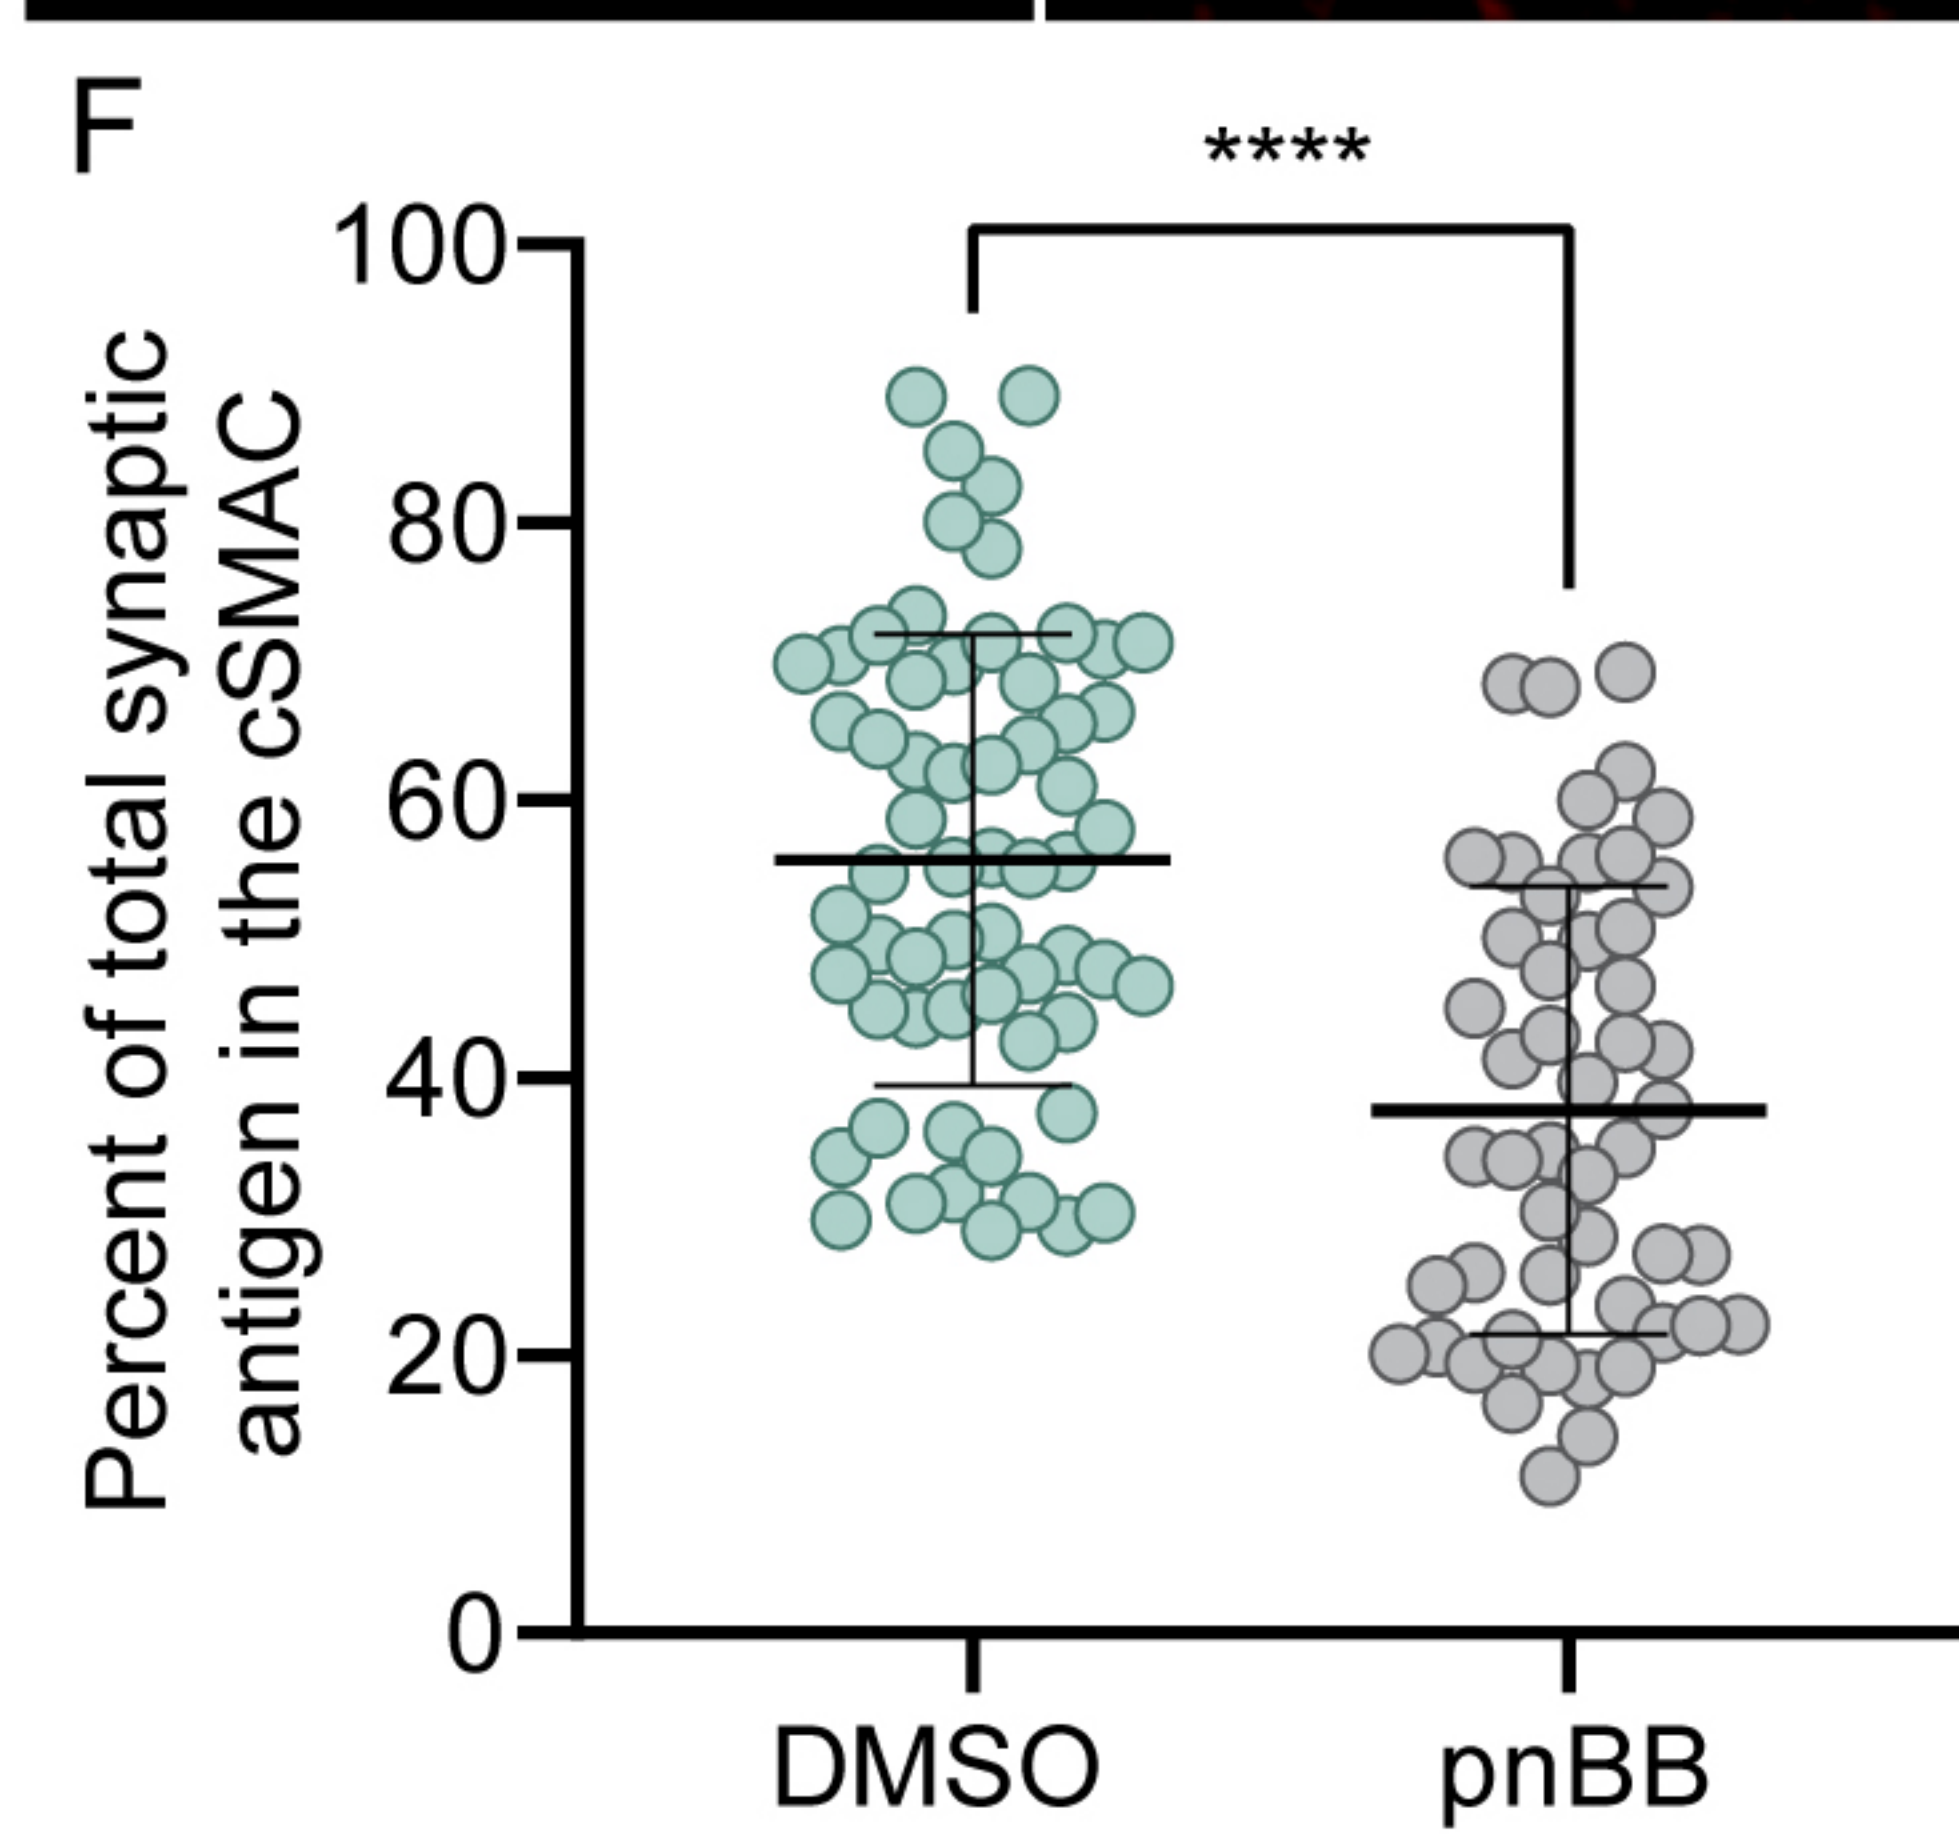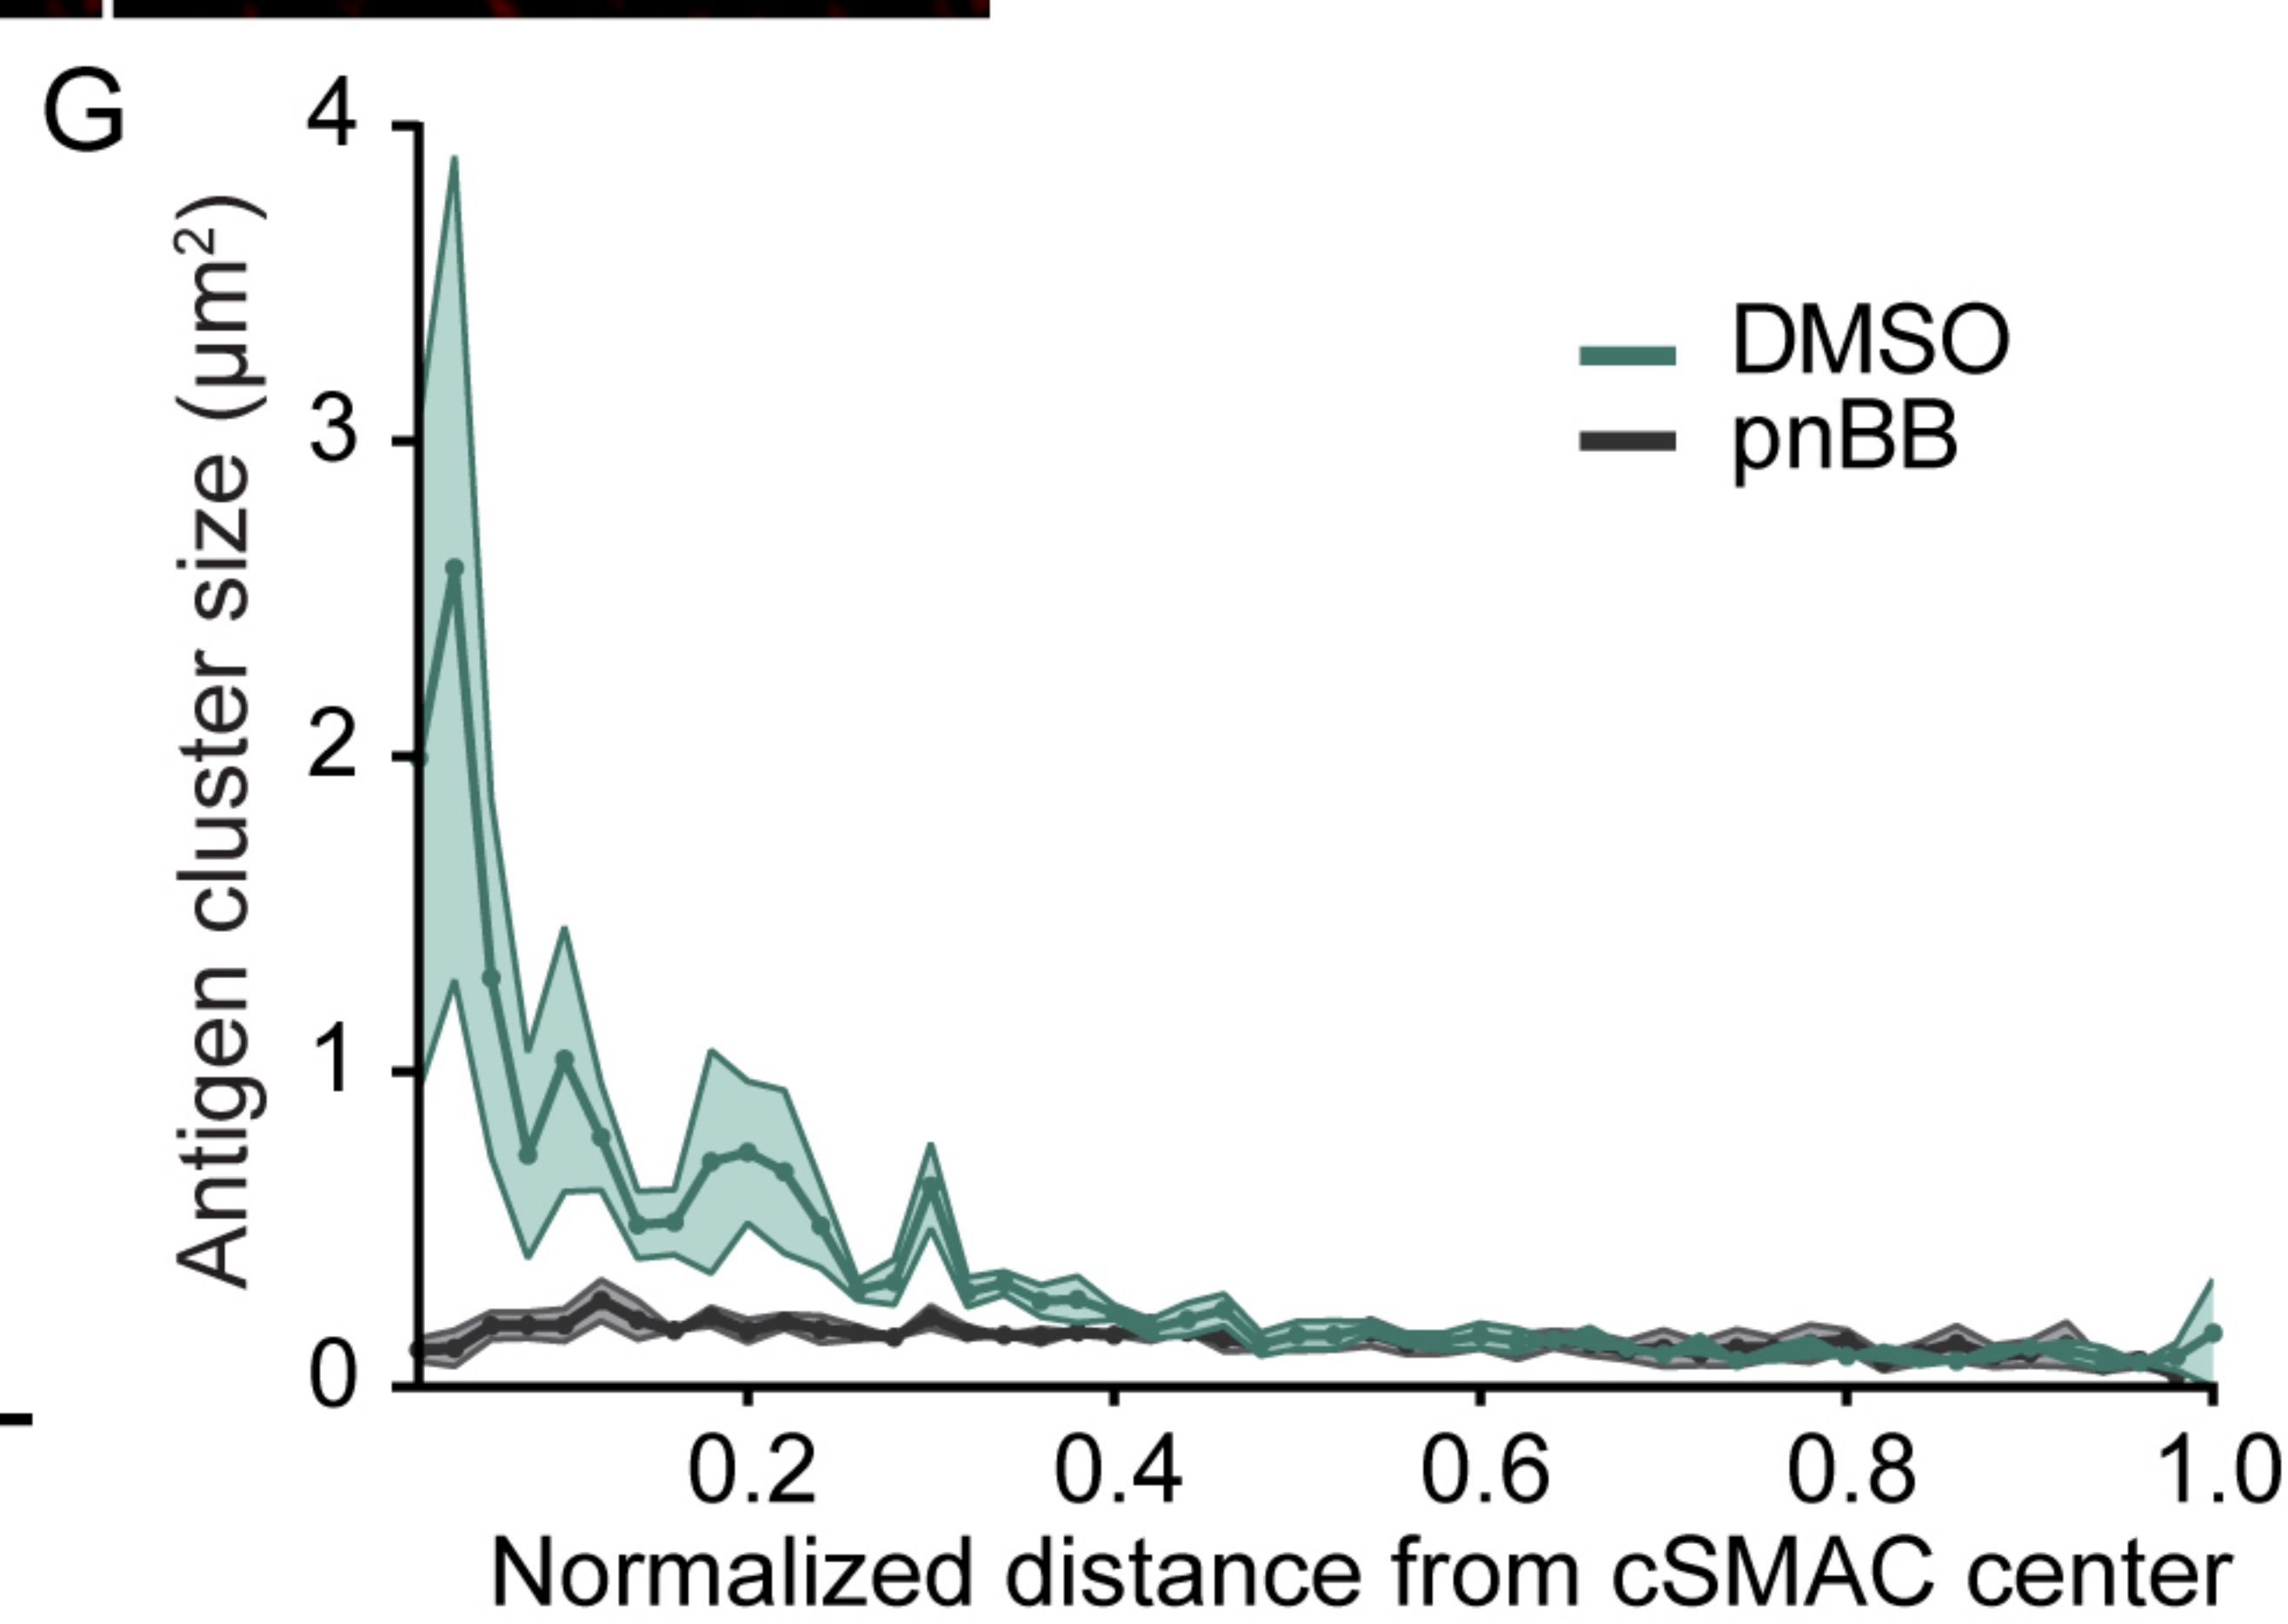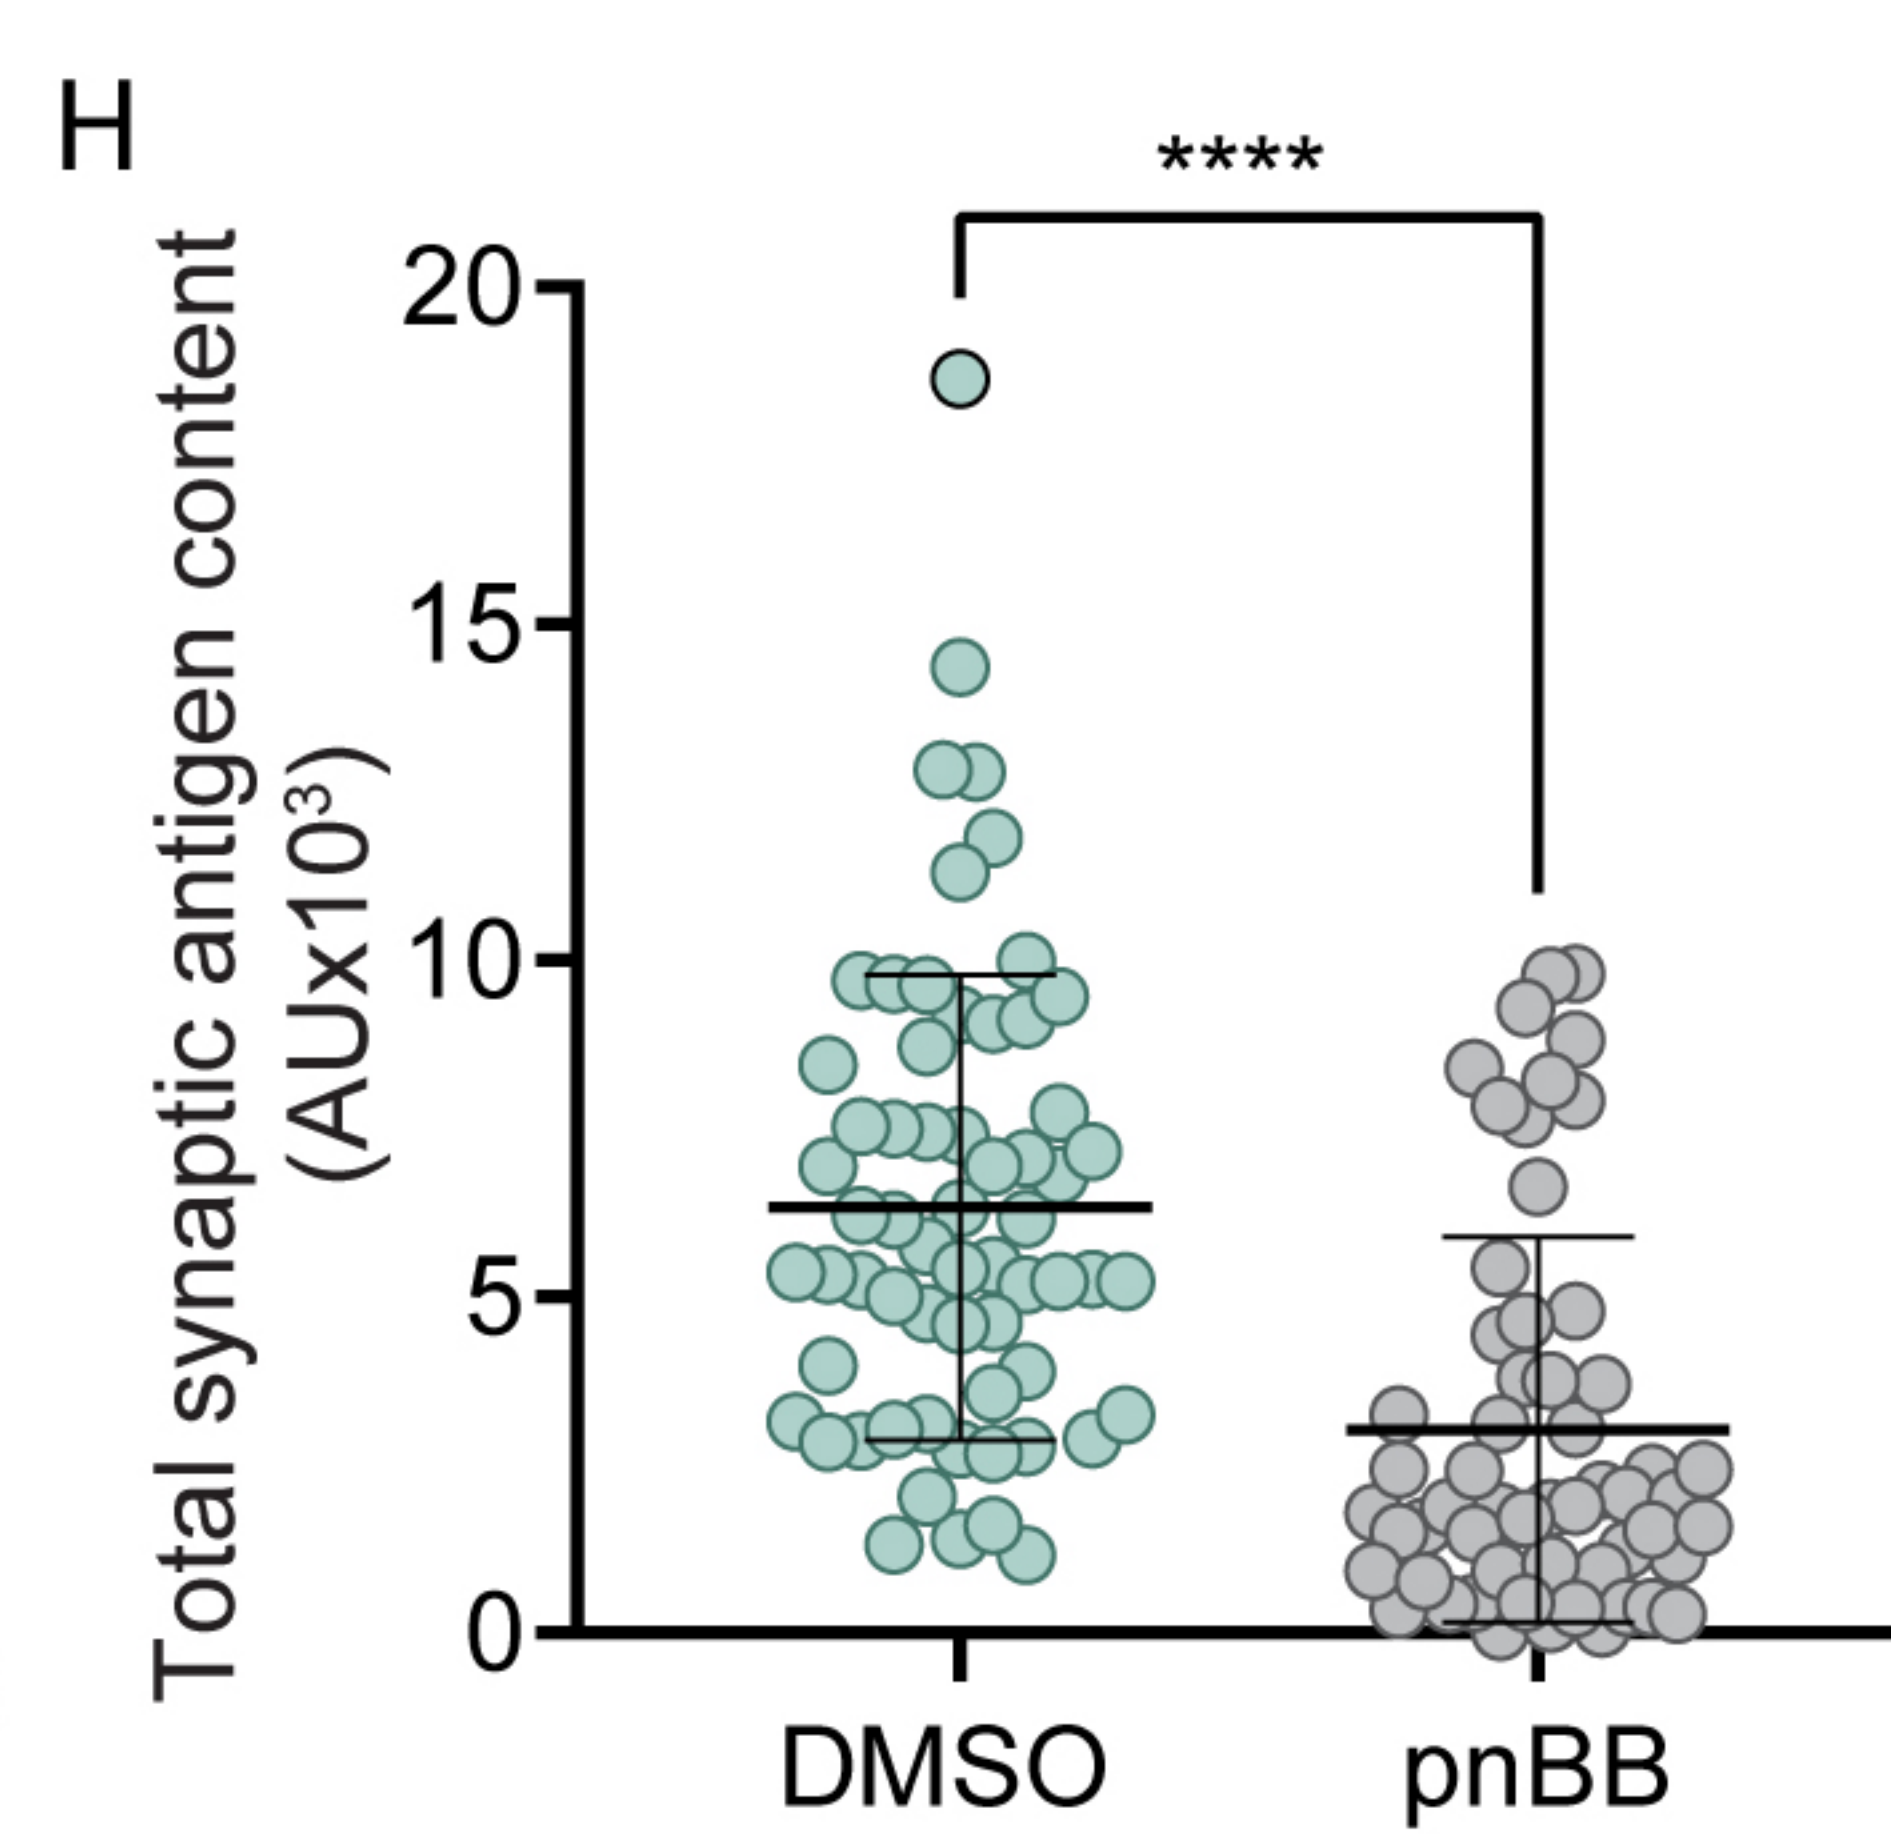



Figure 6

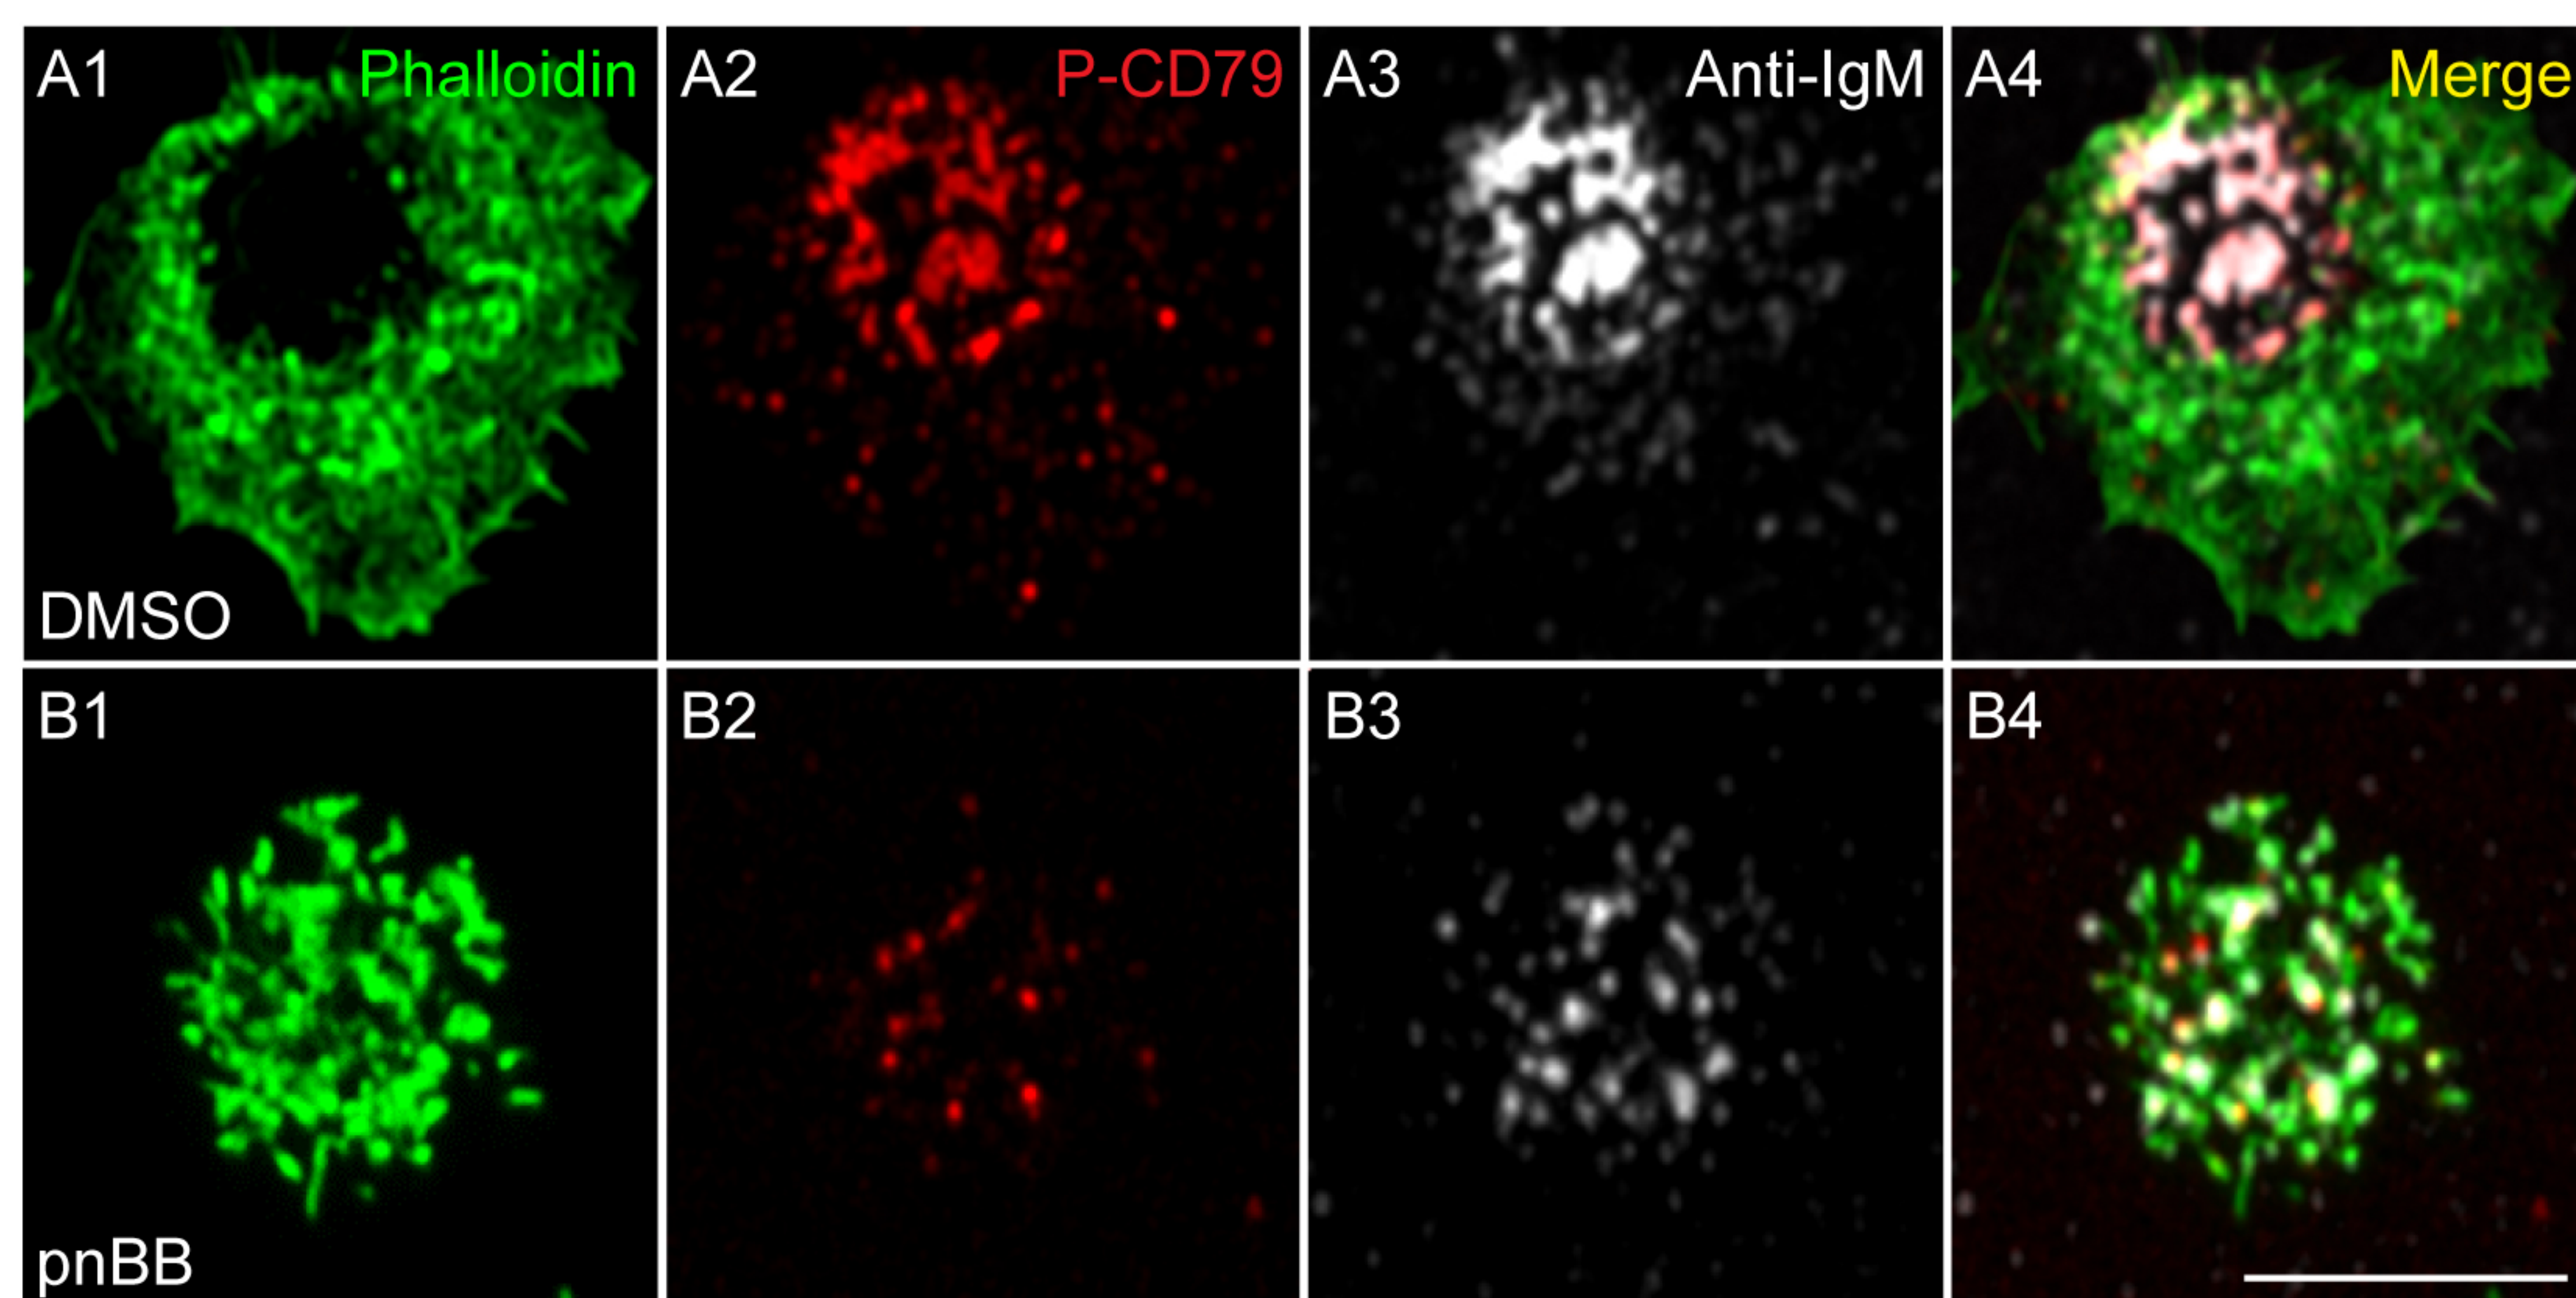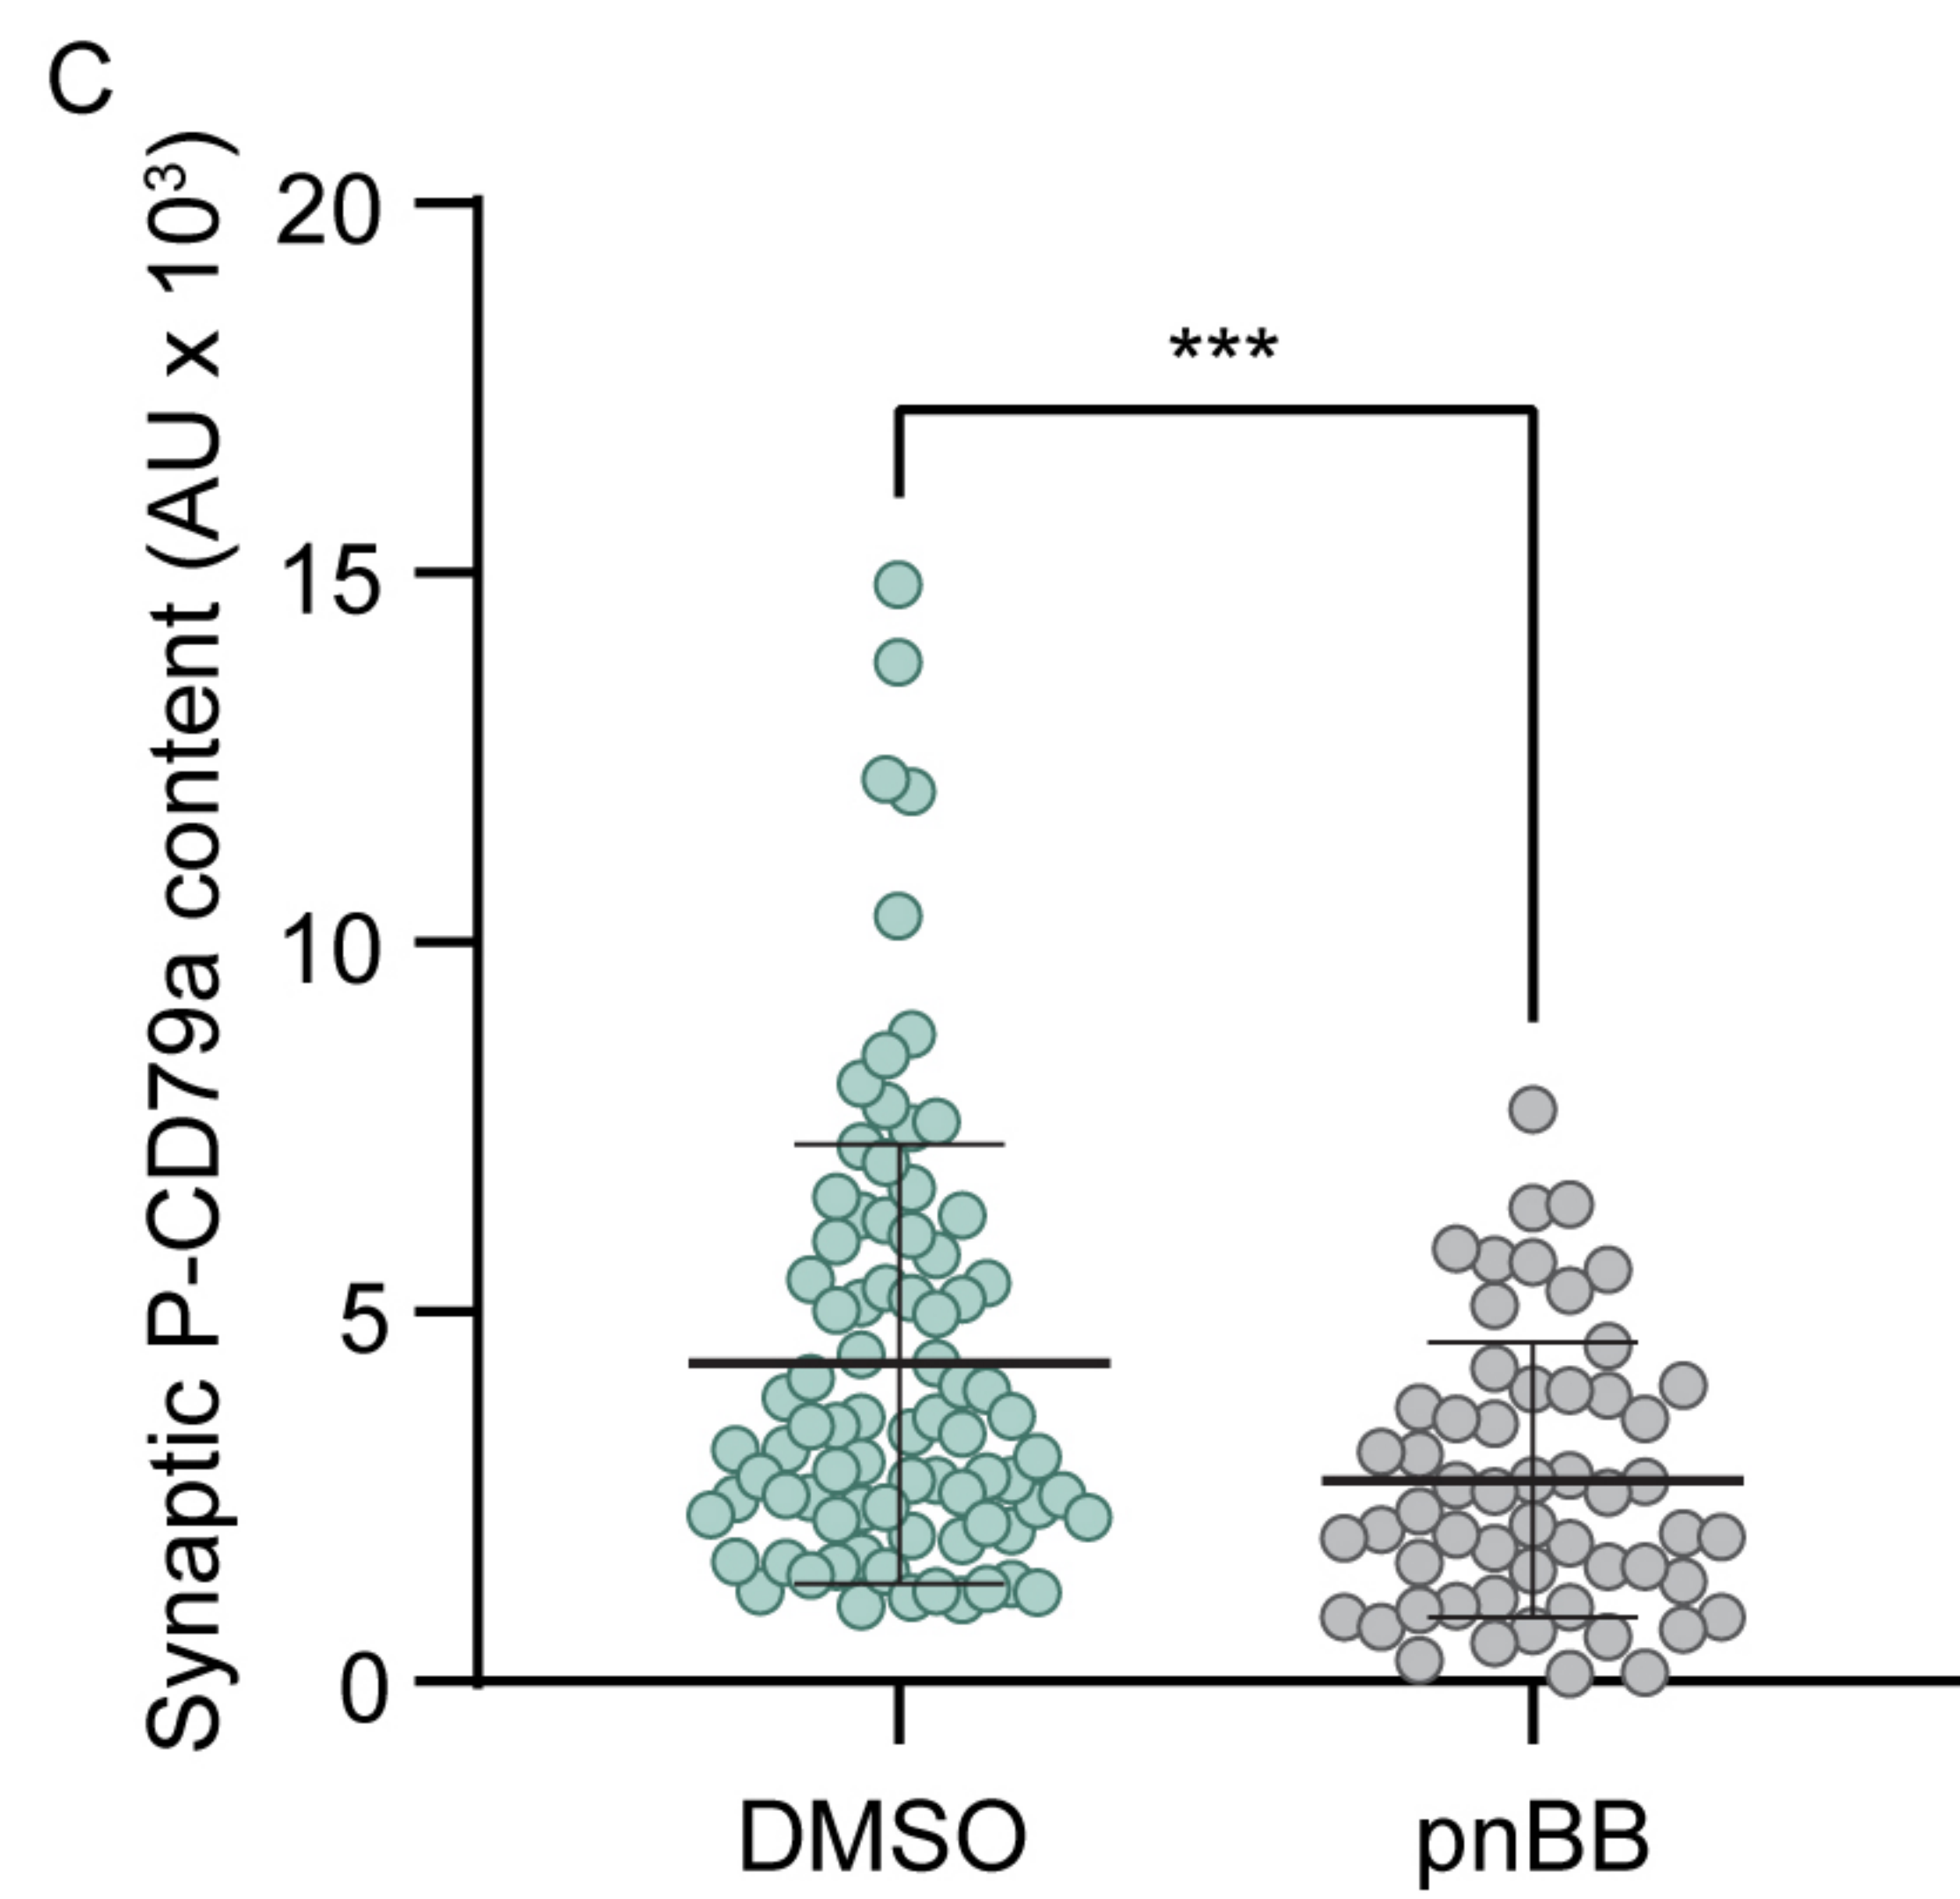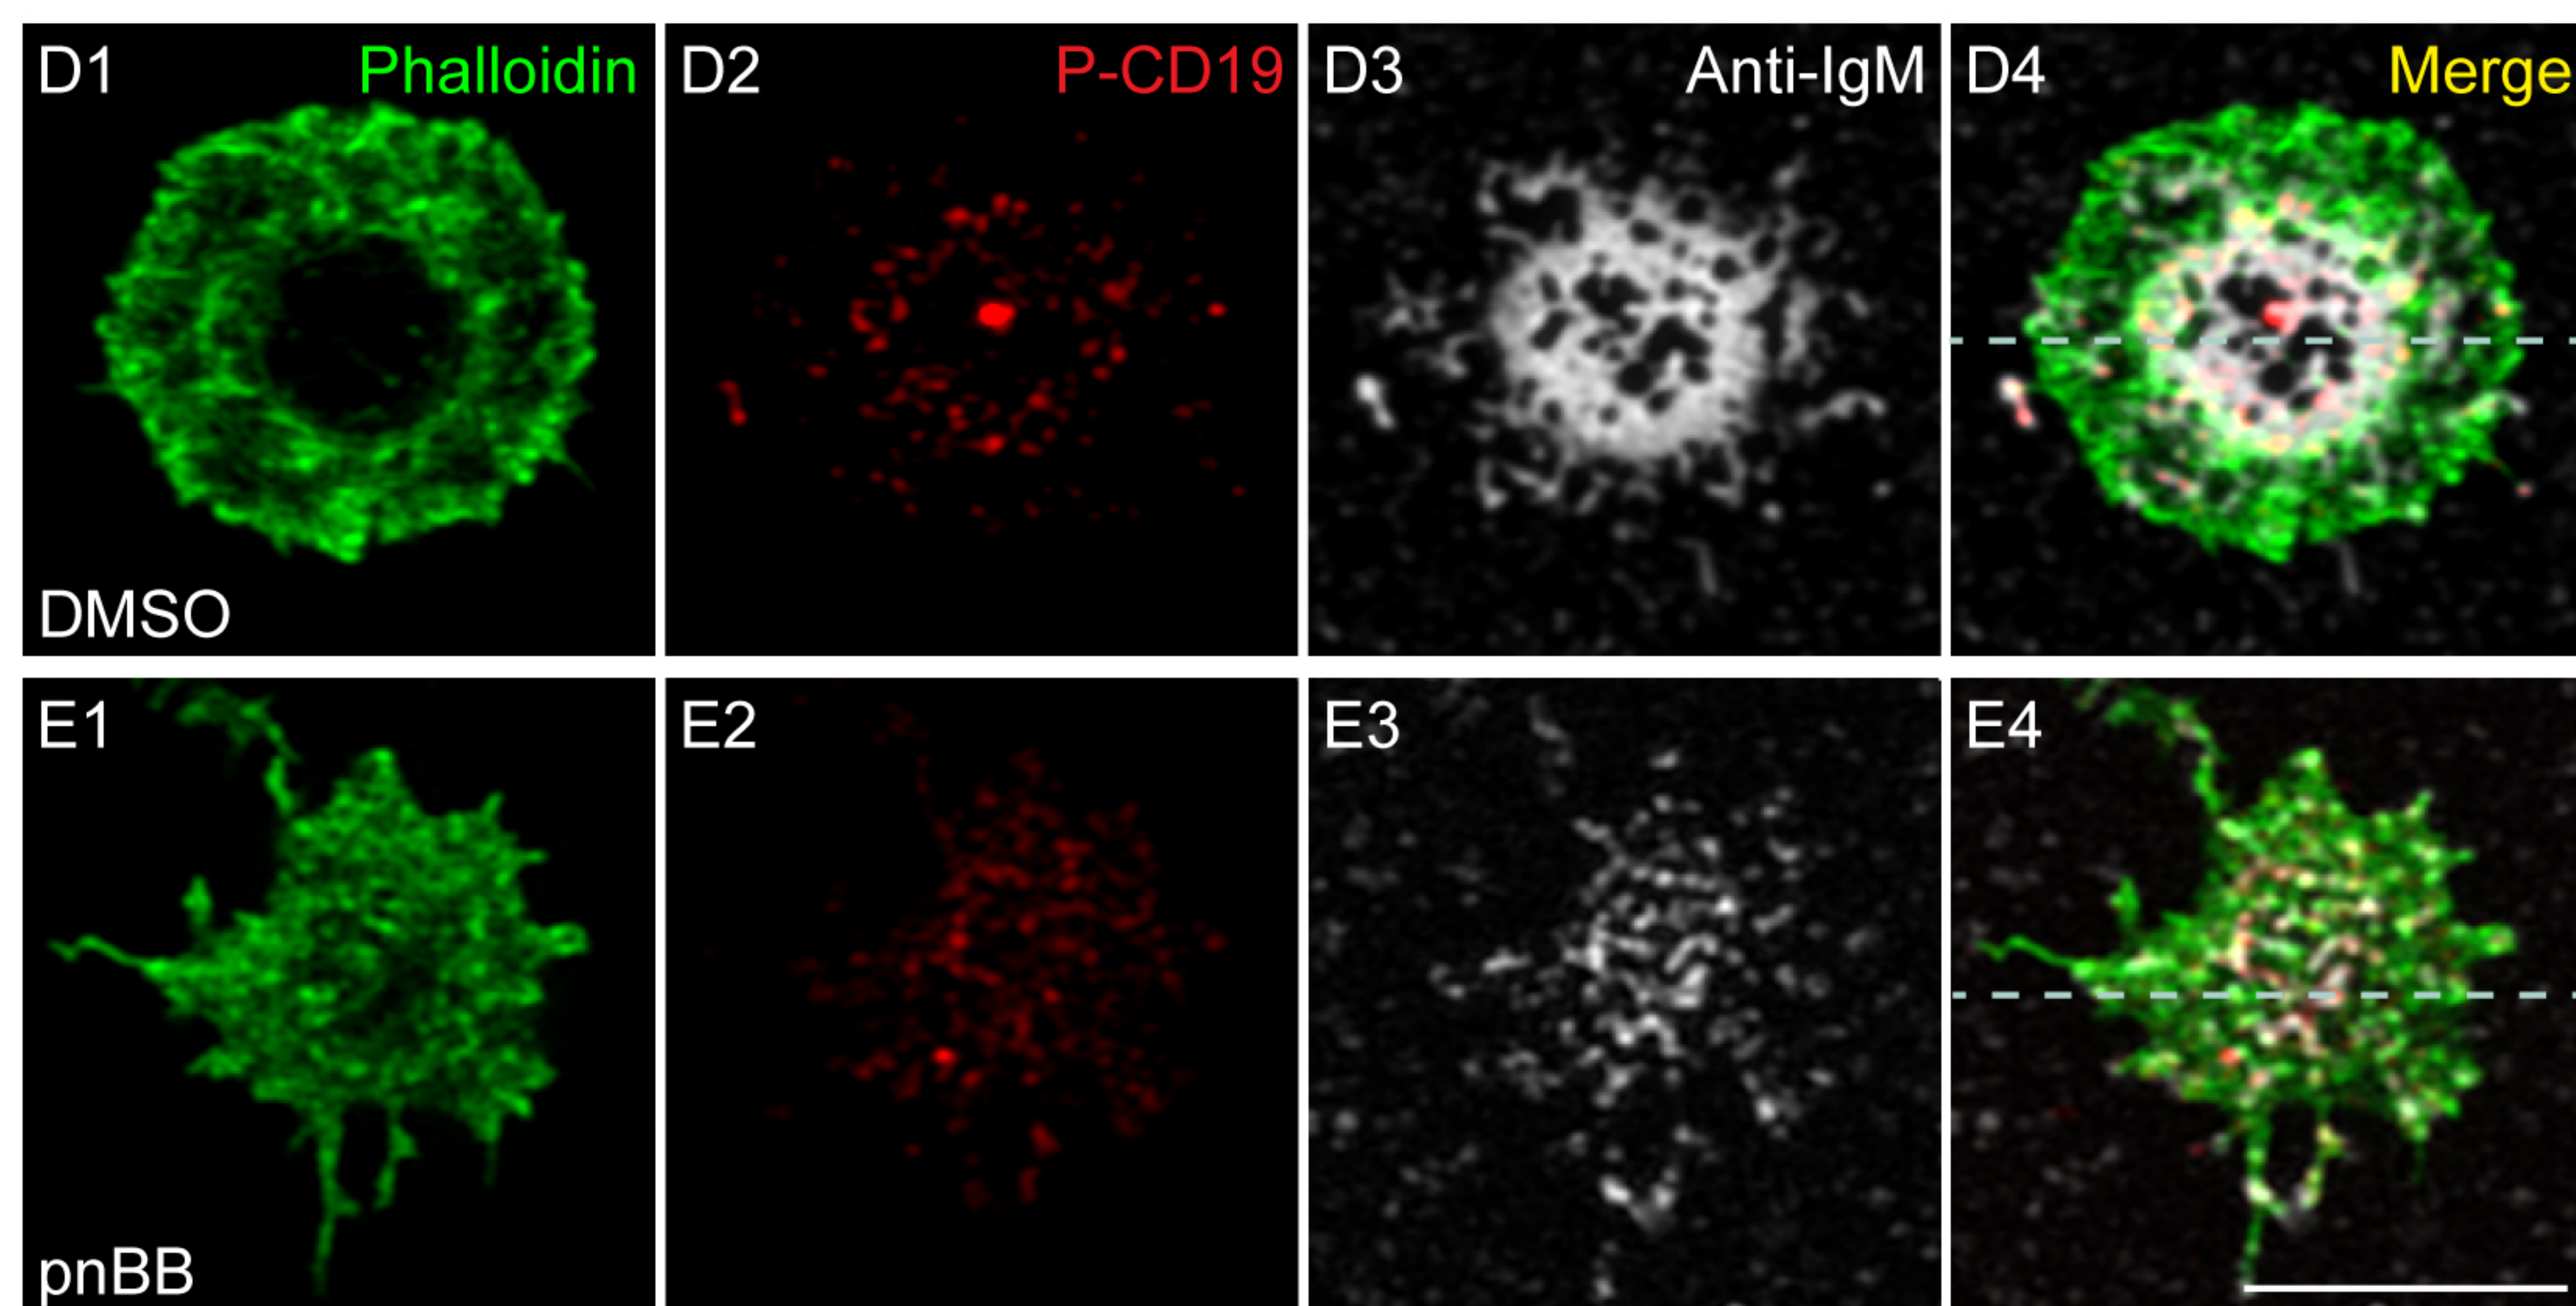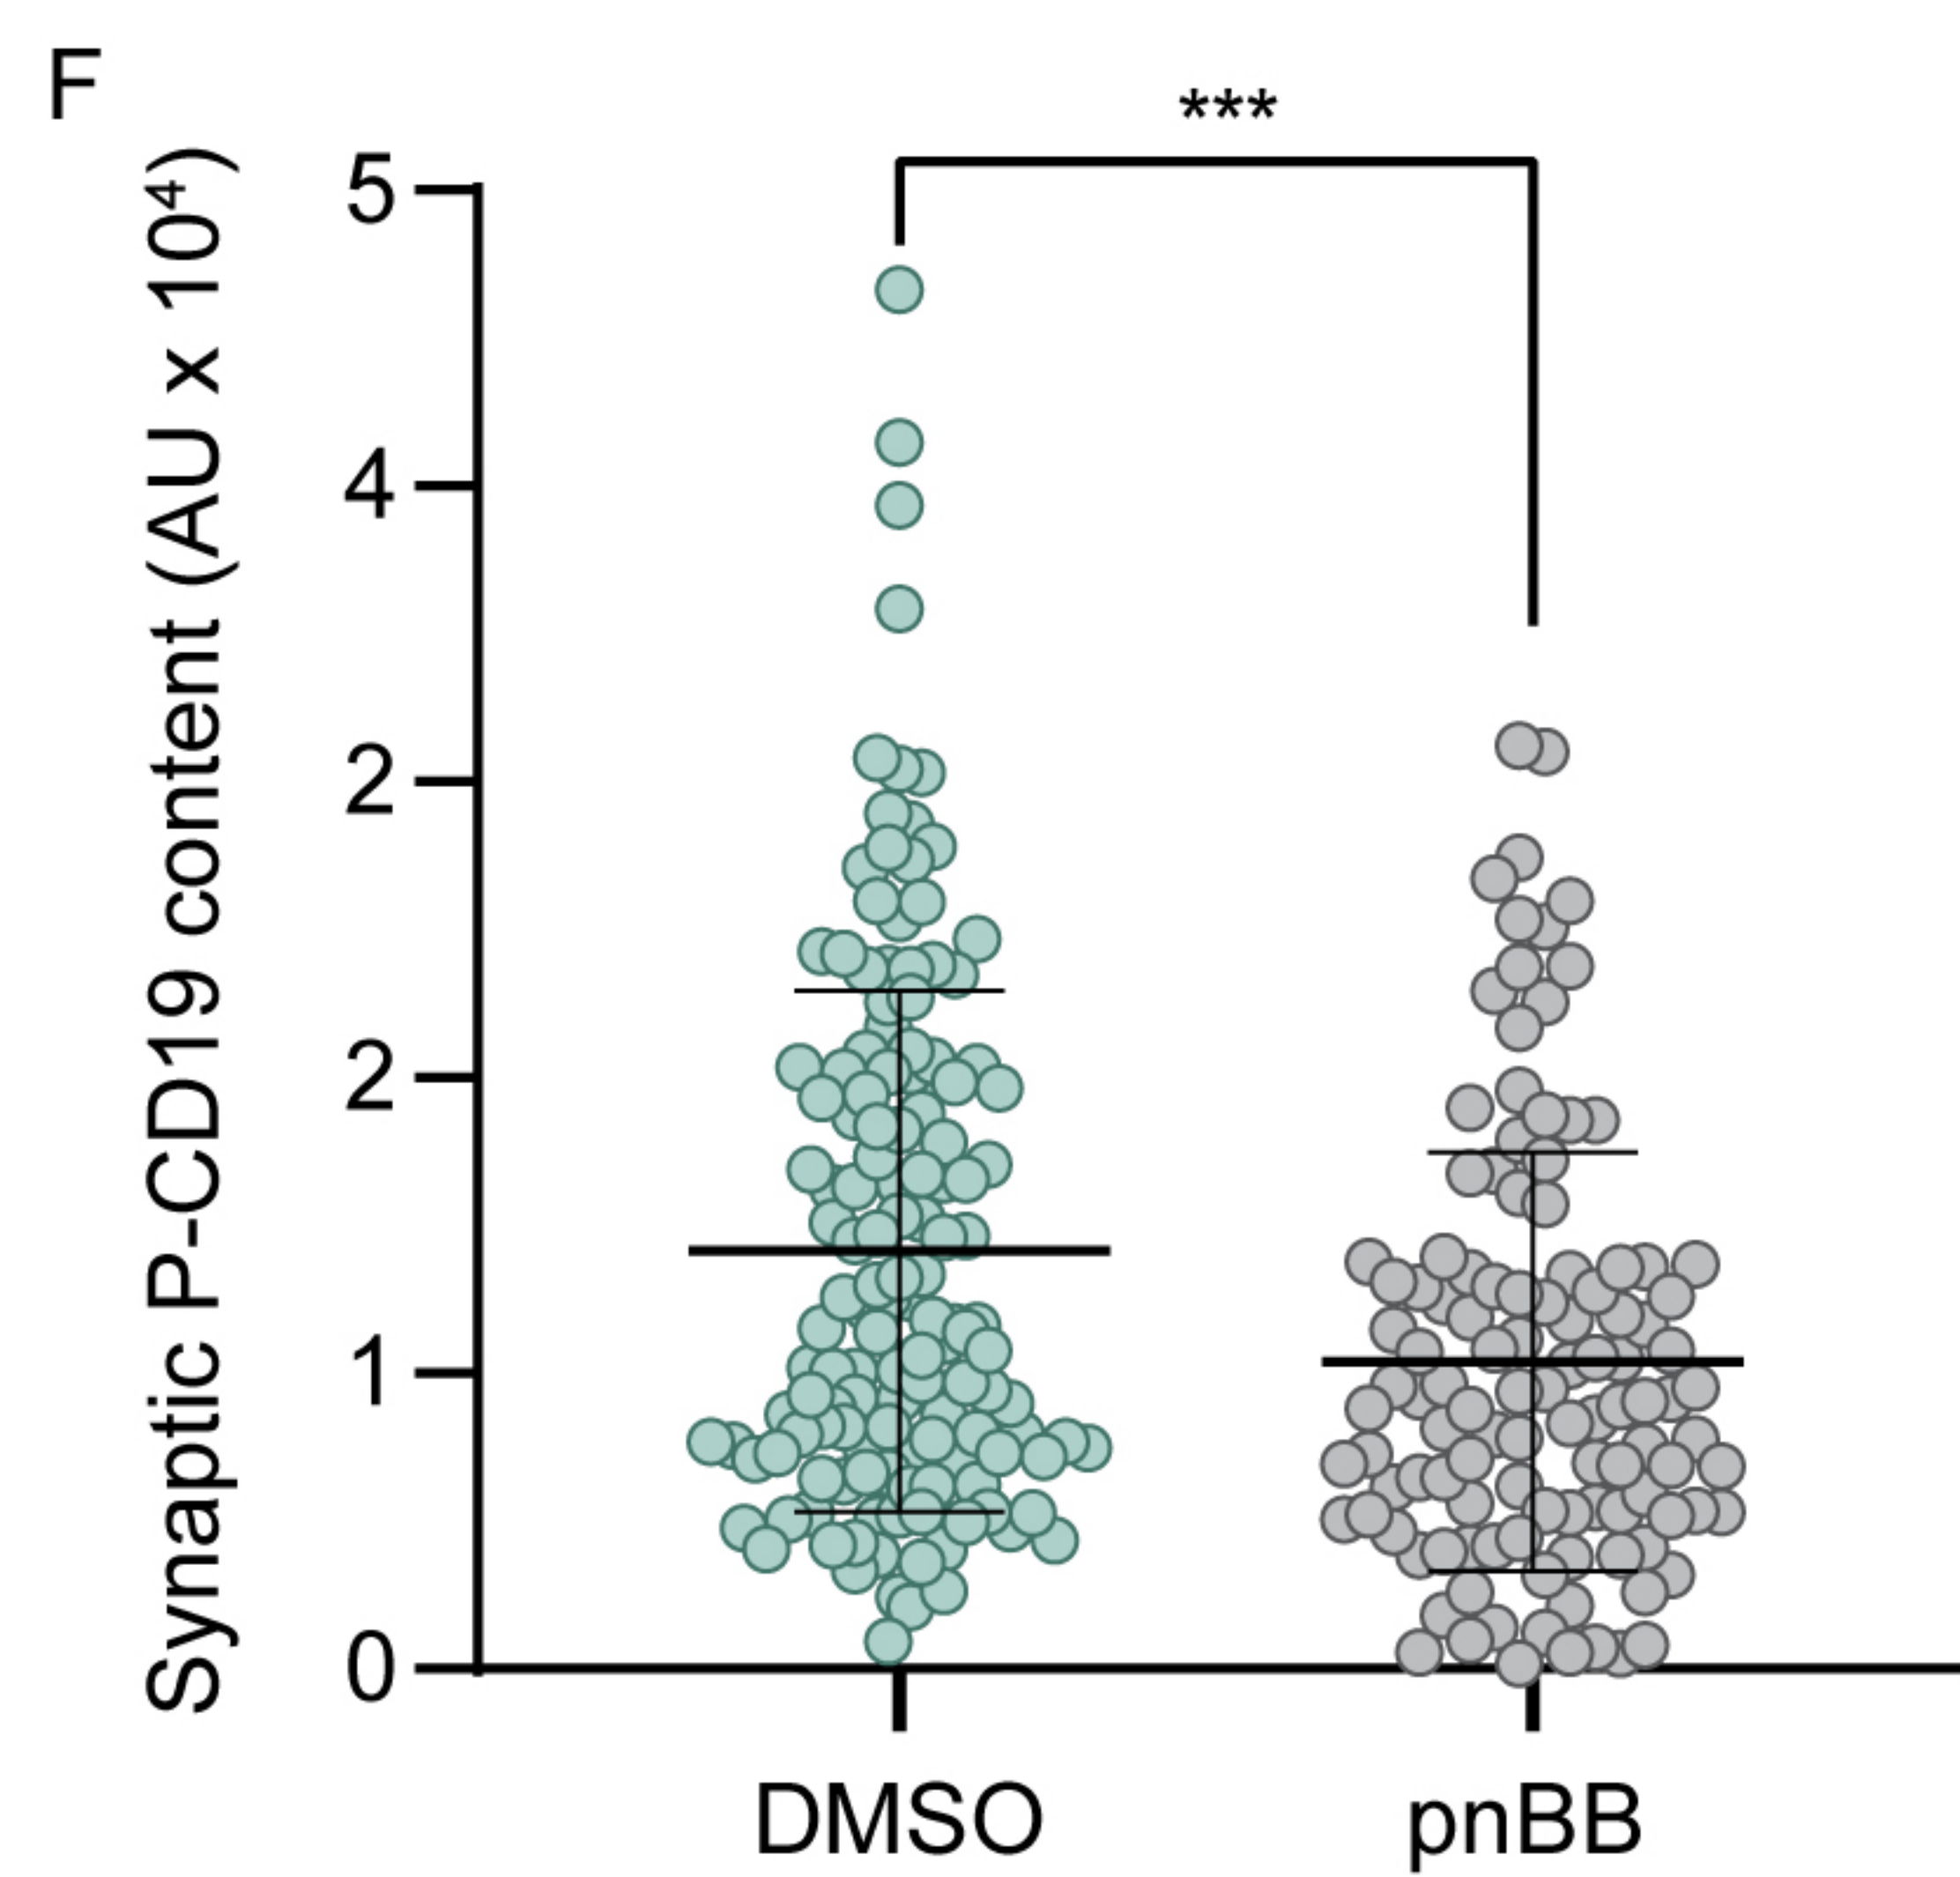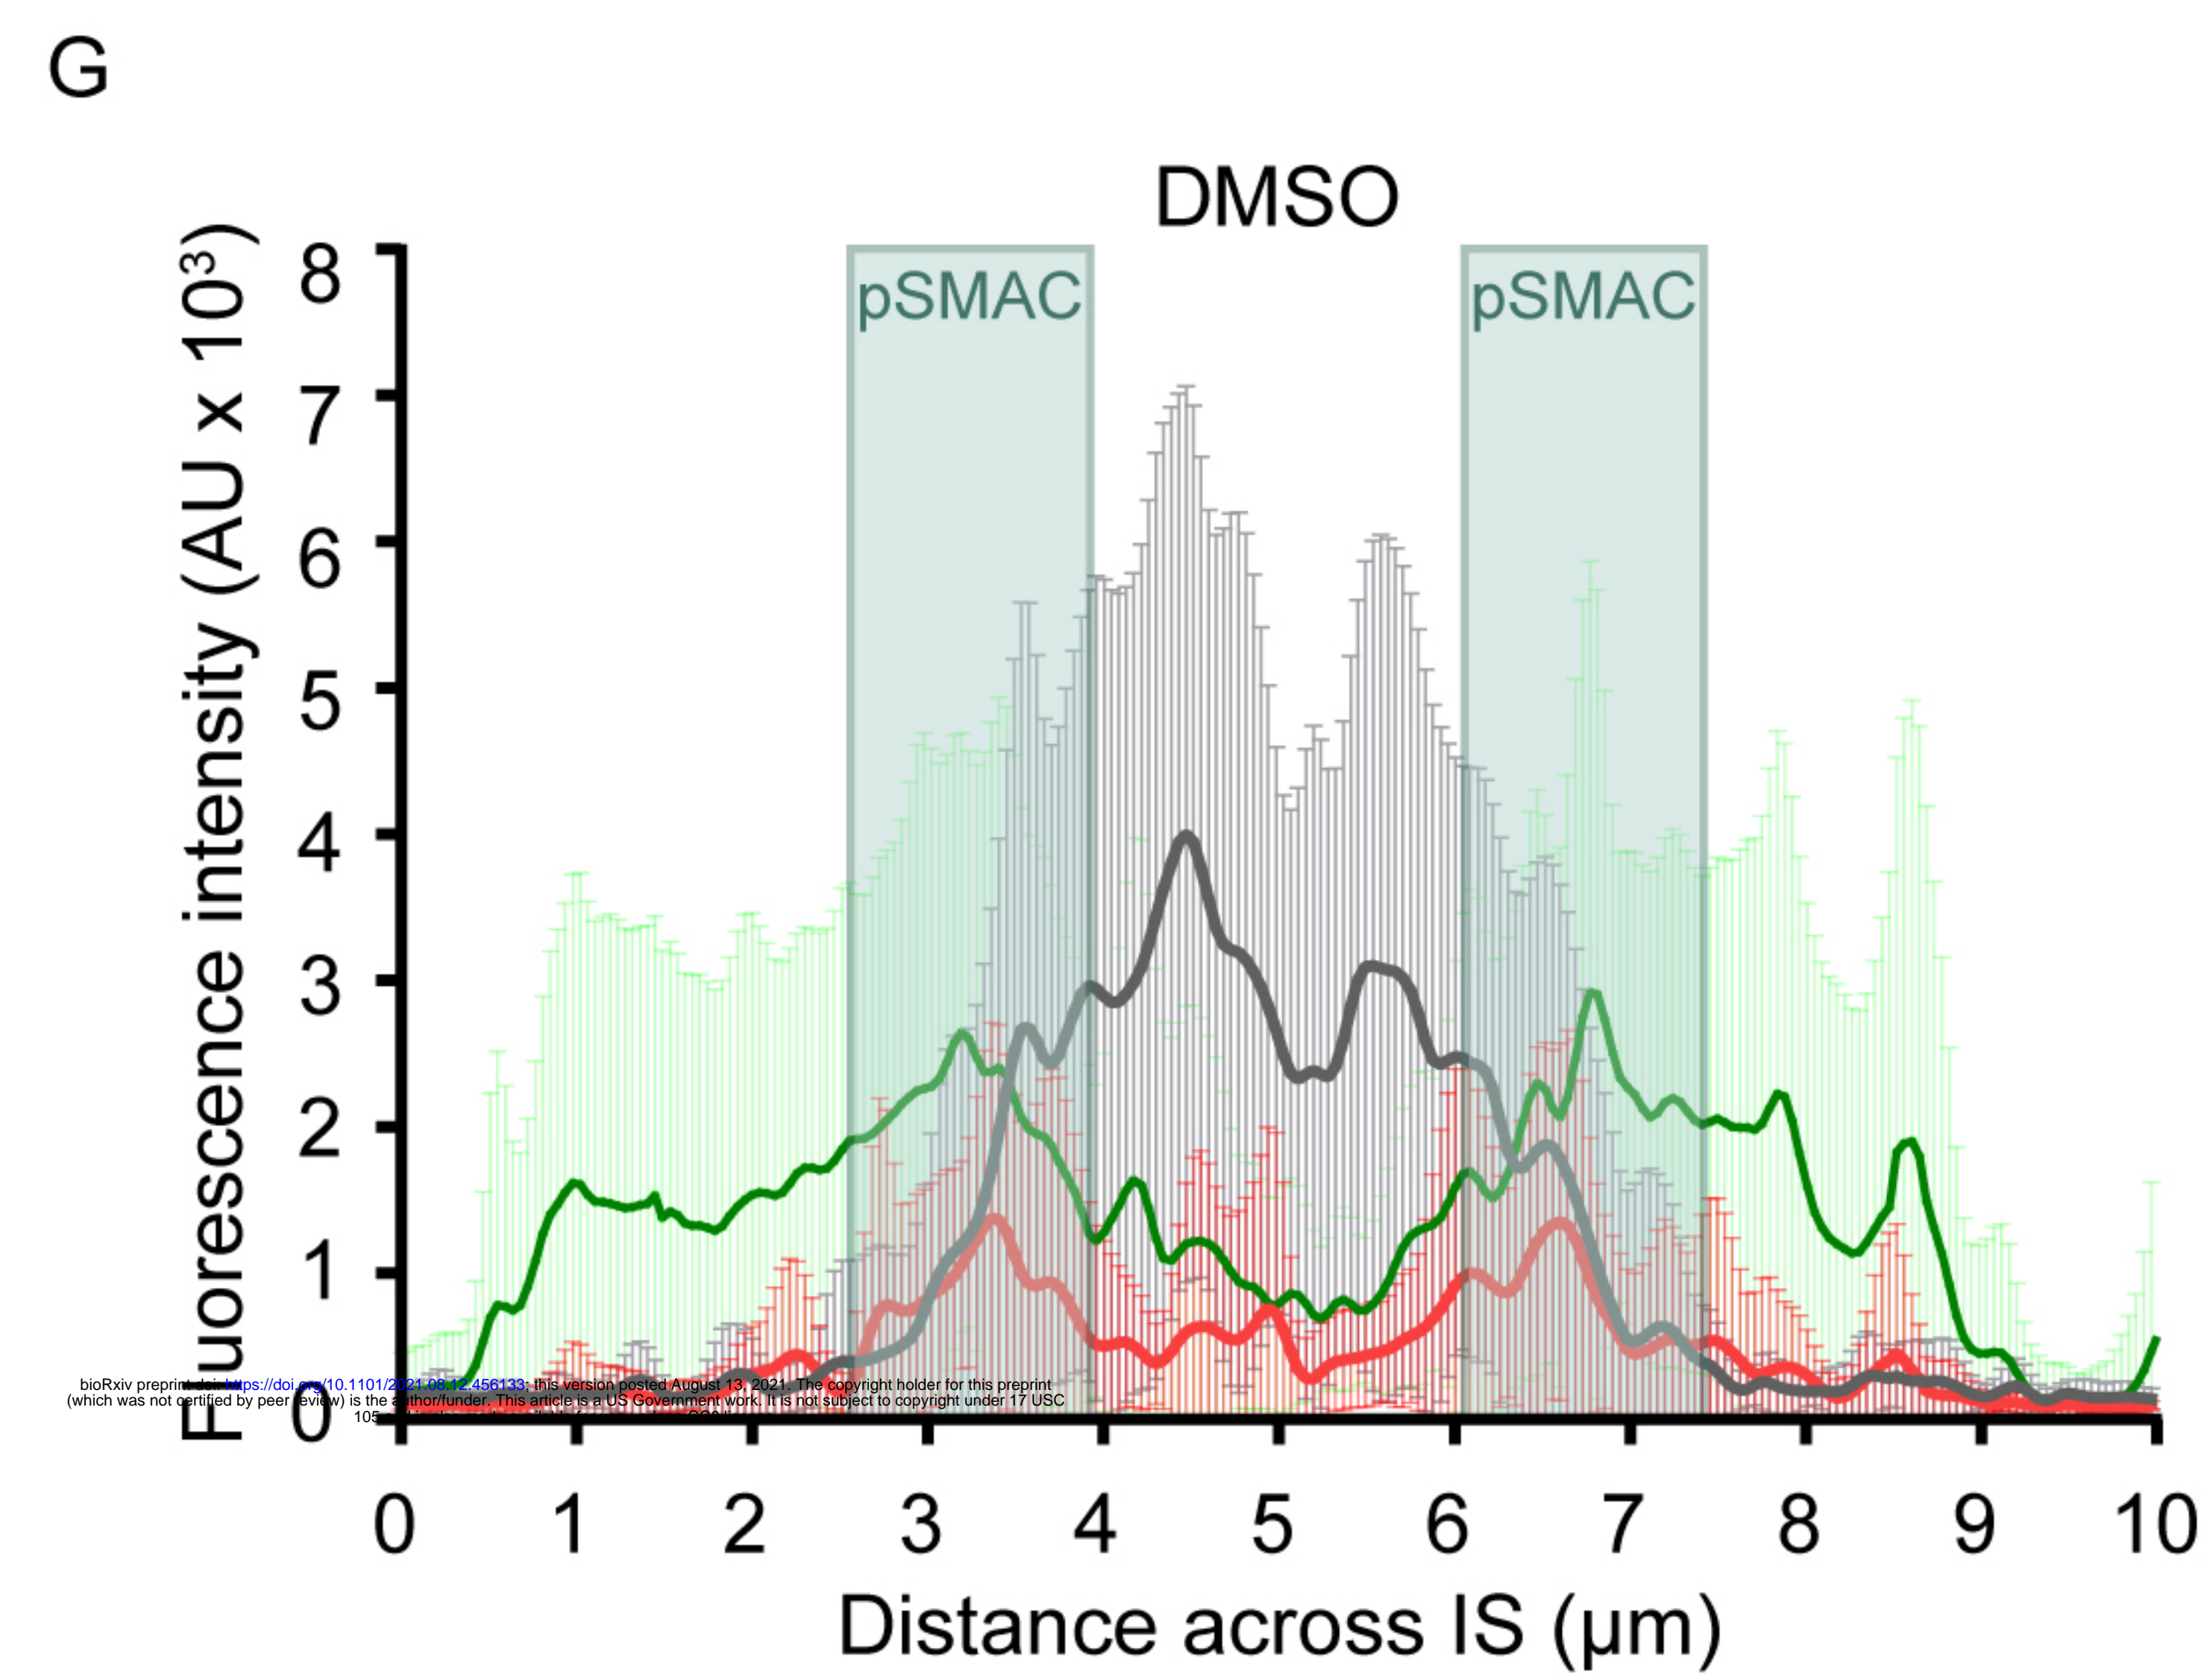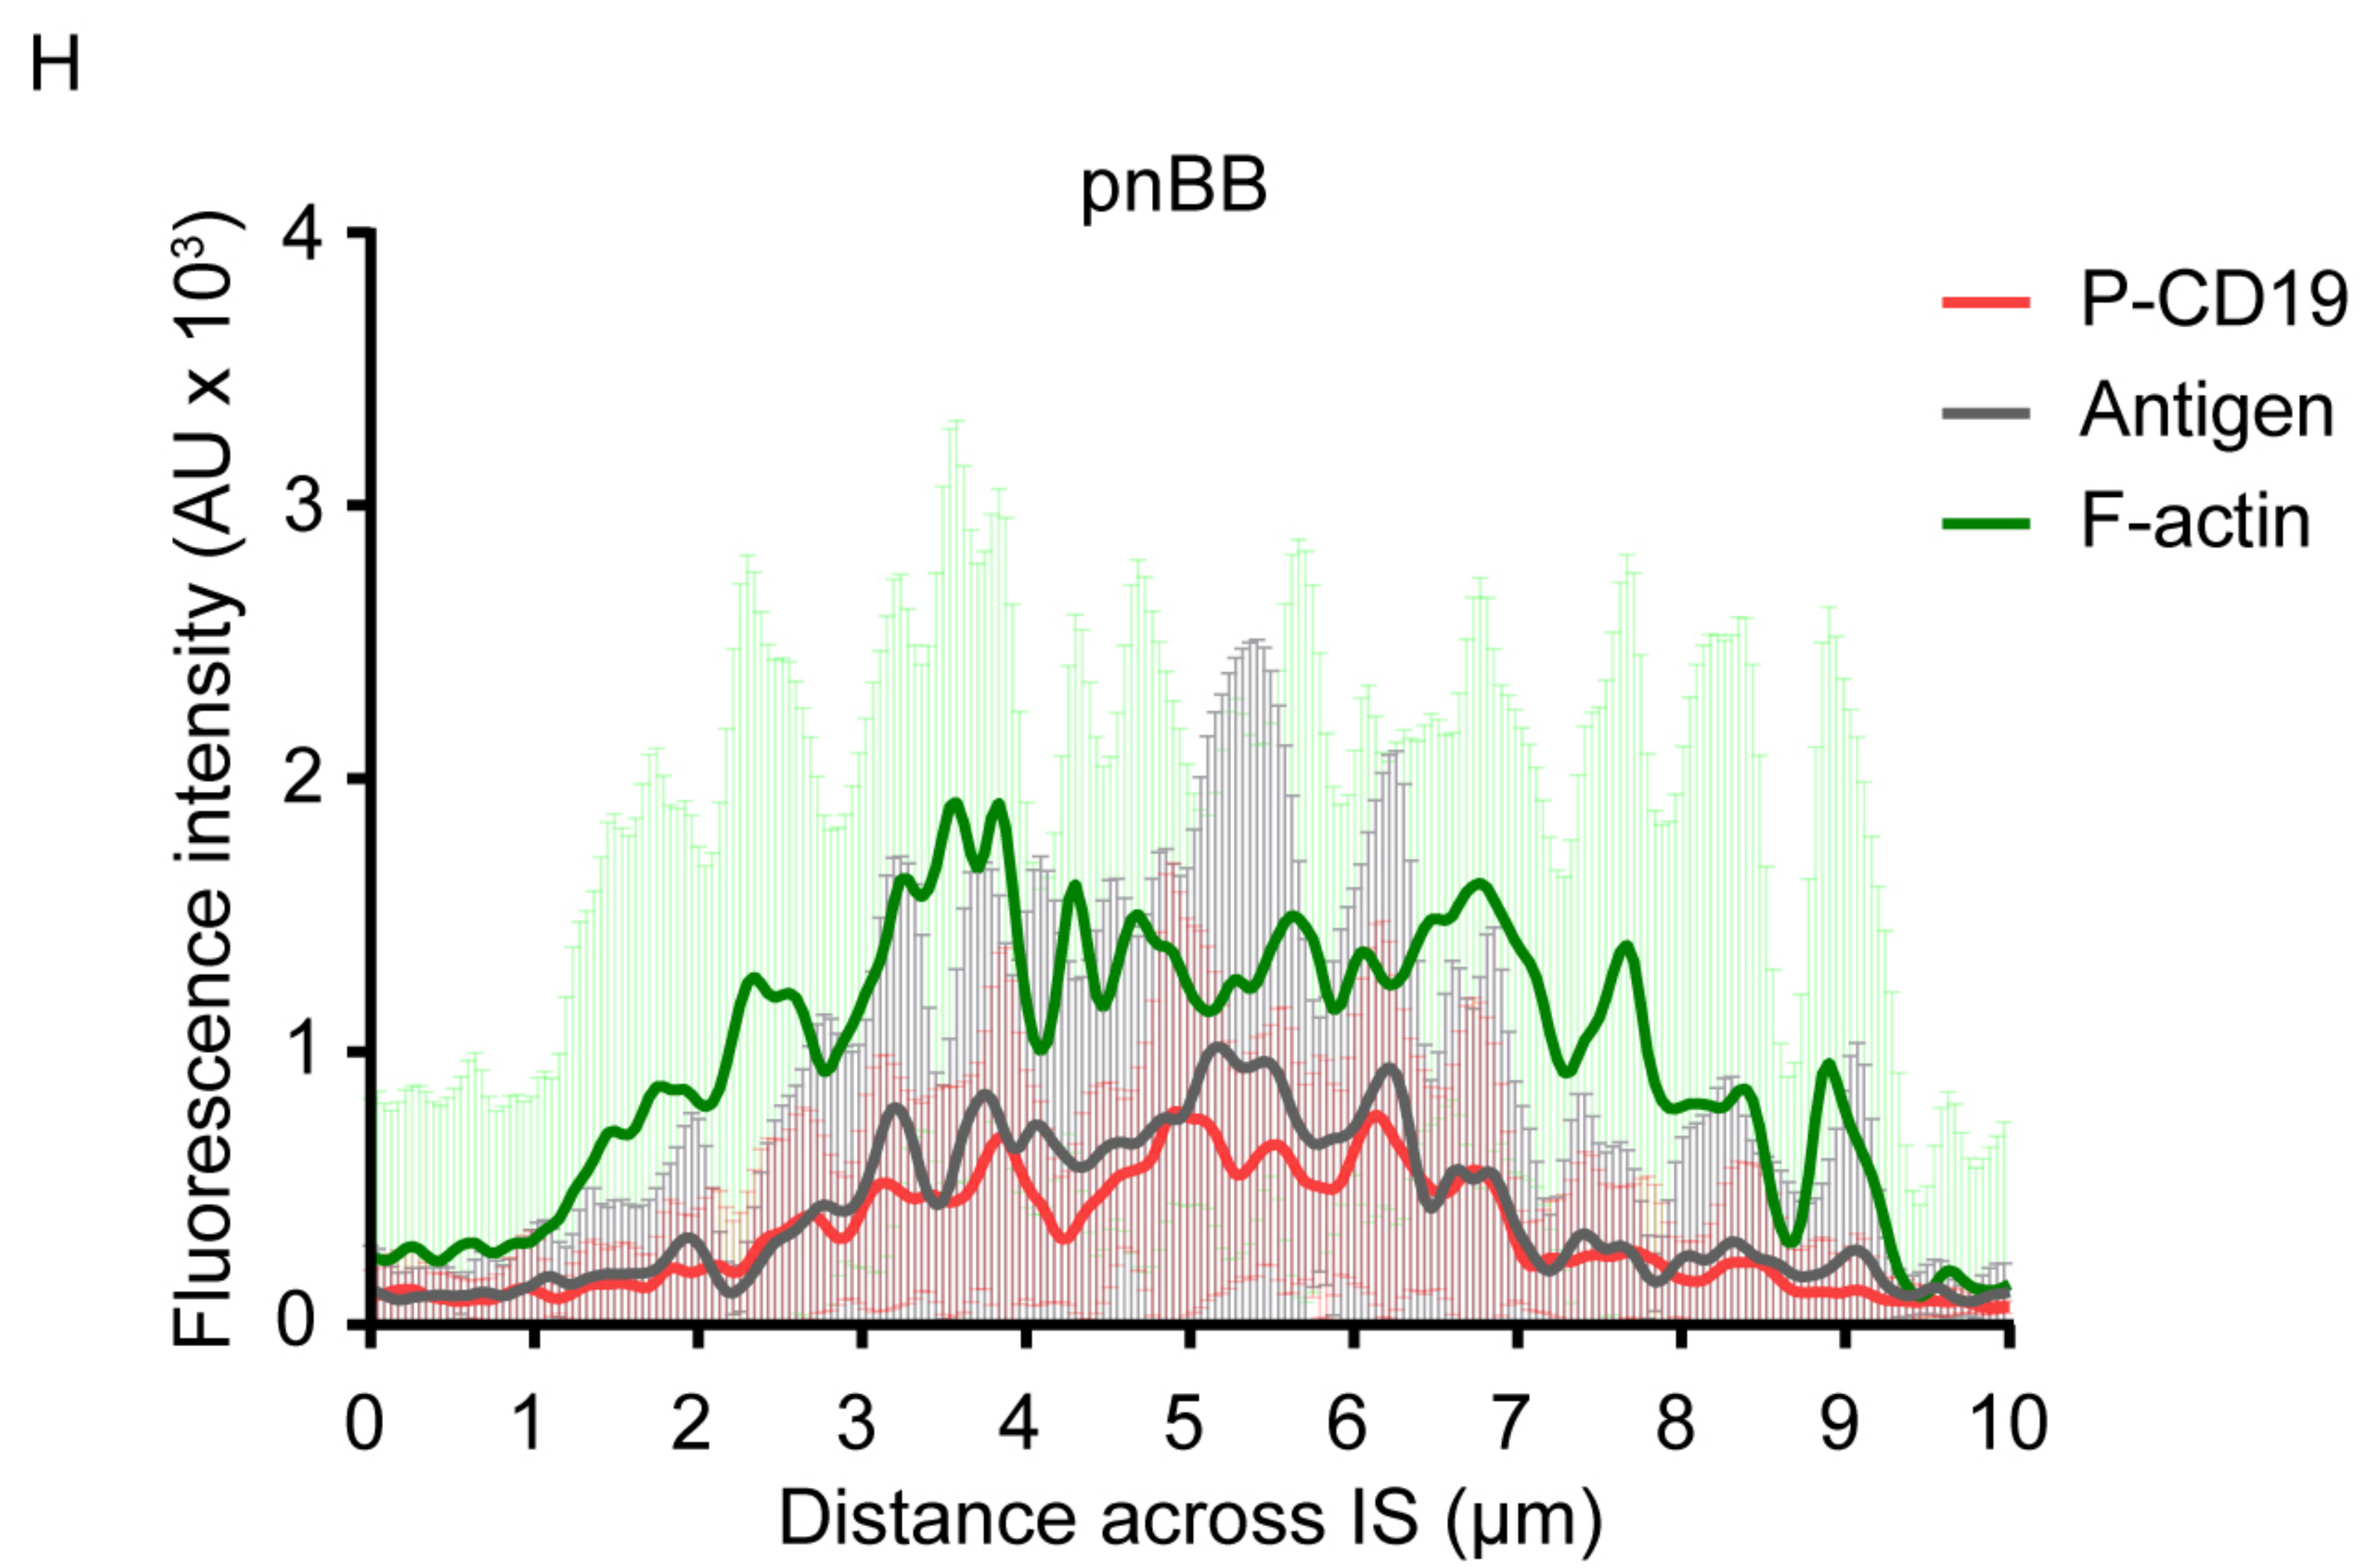



Figure 7

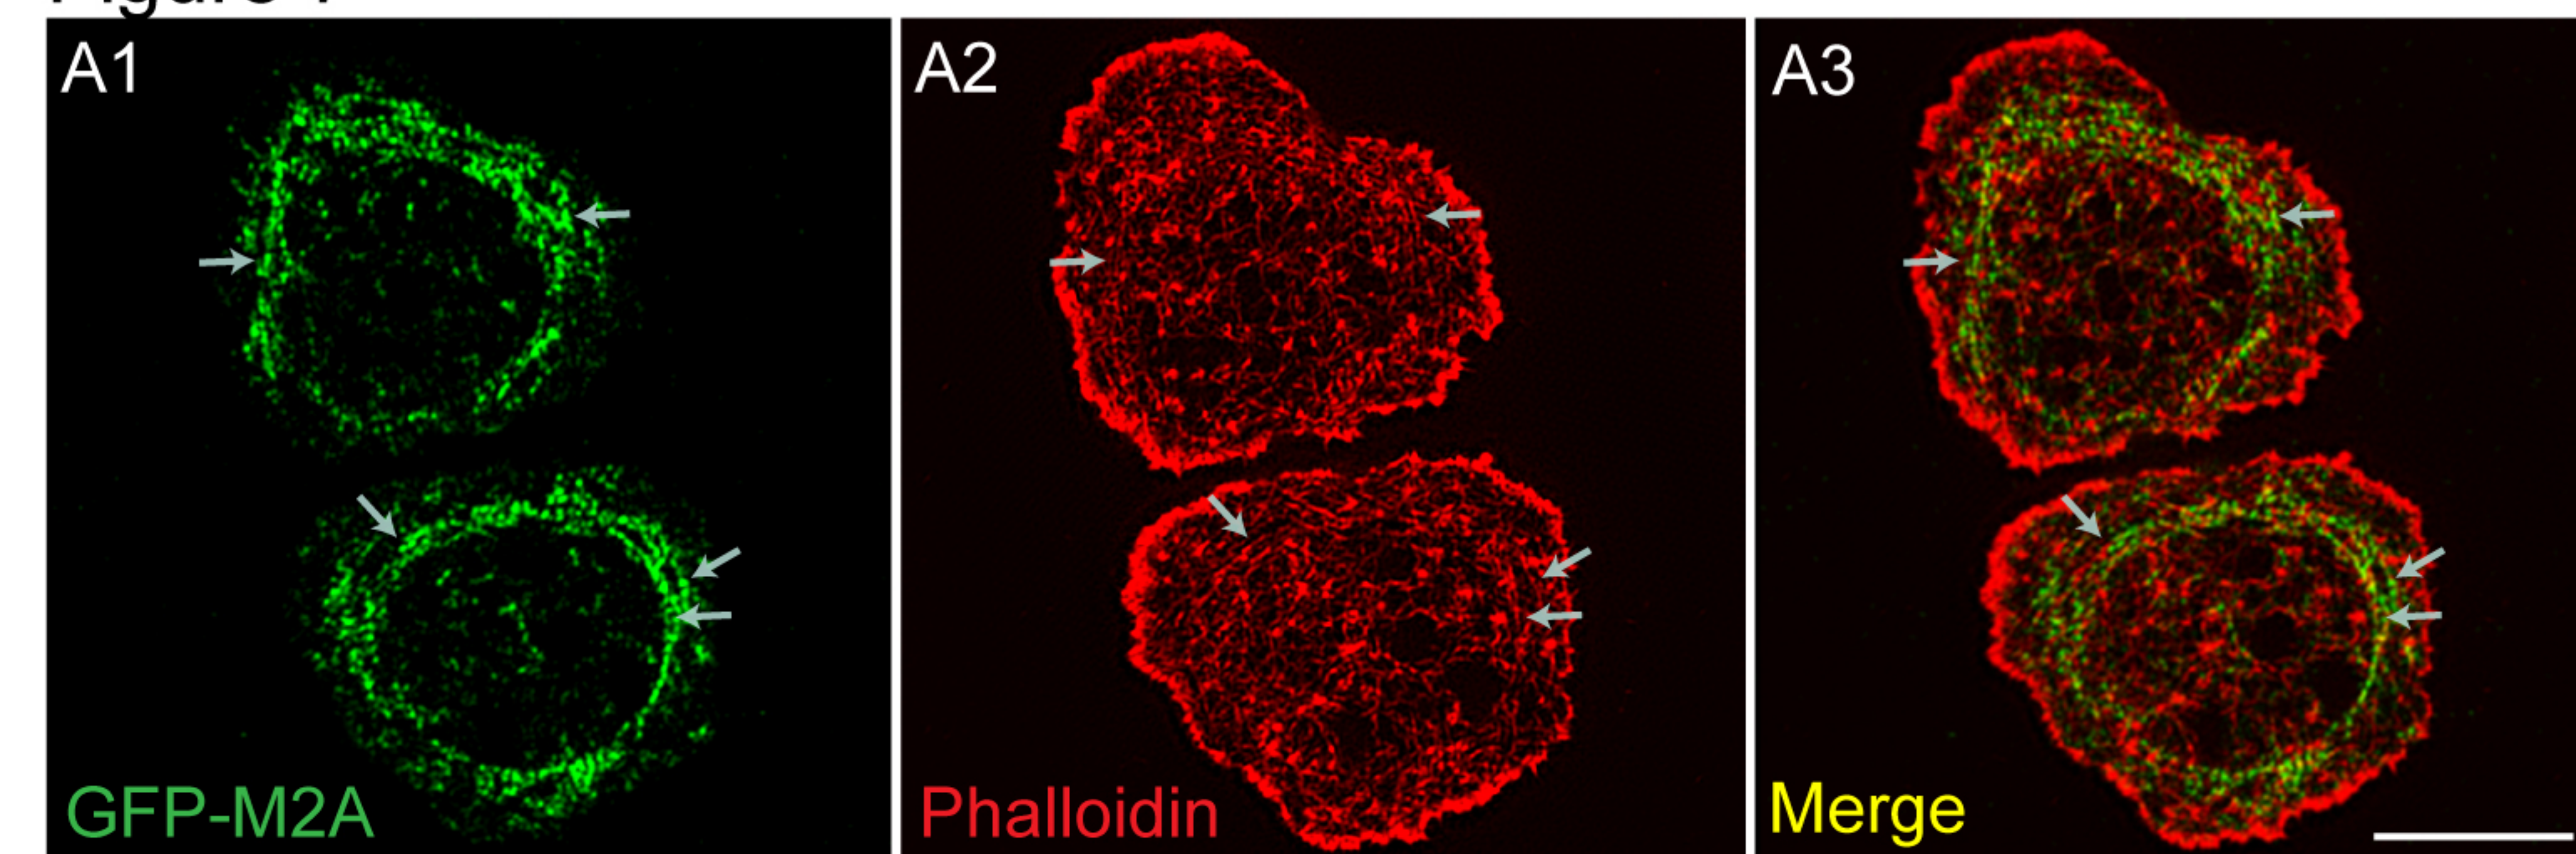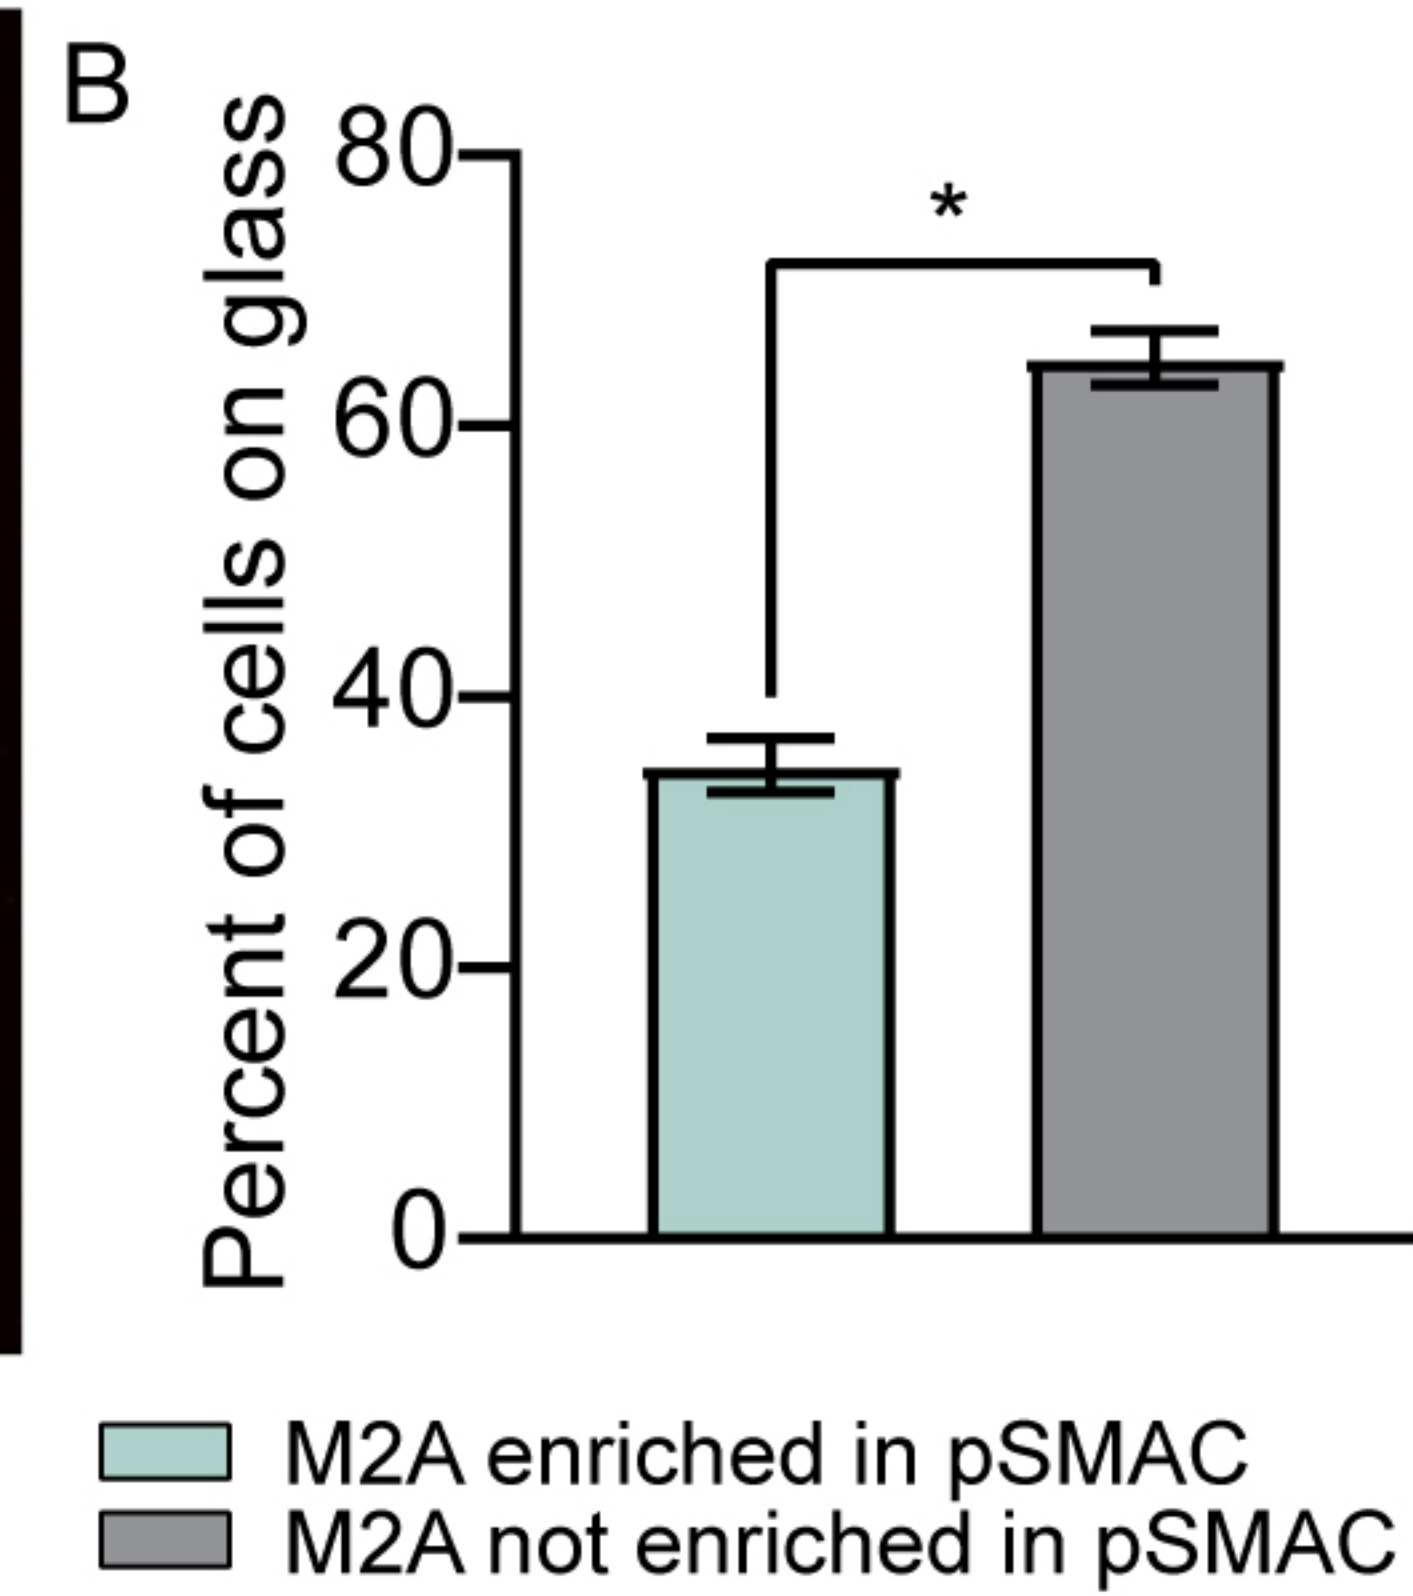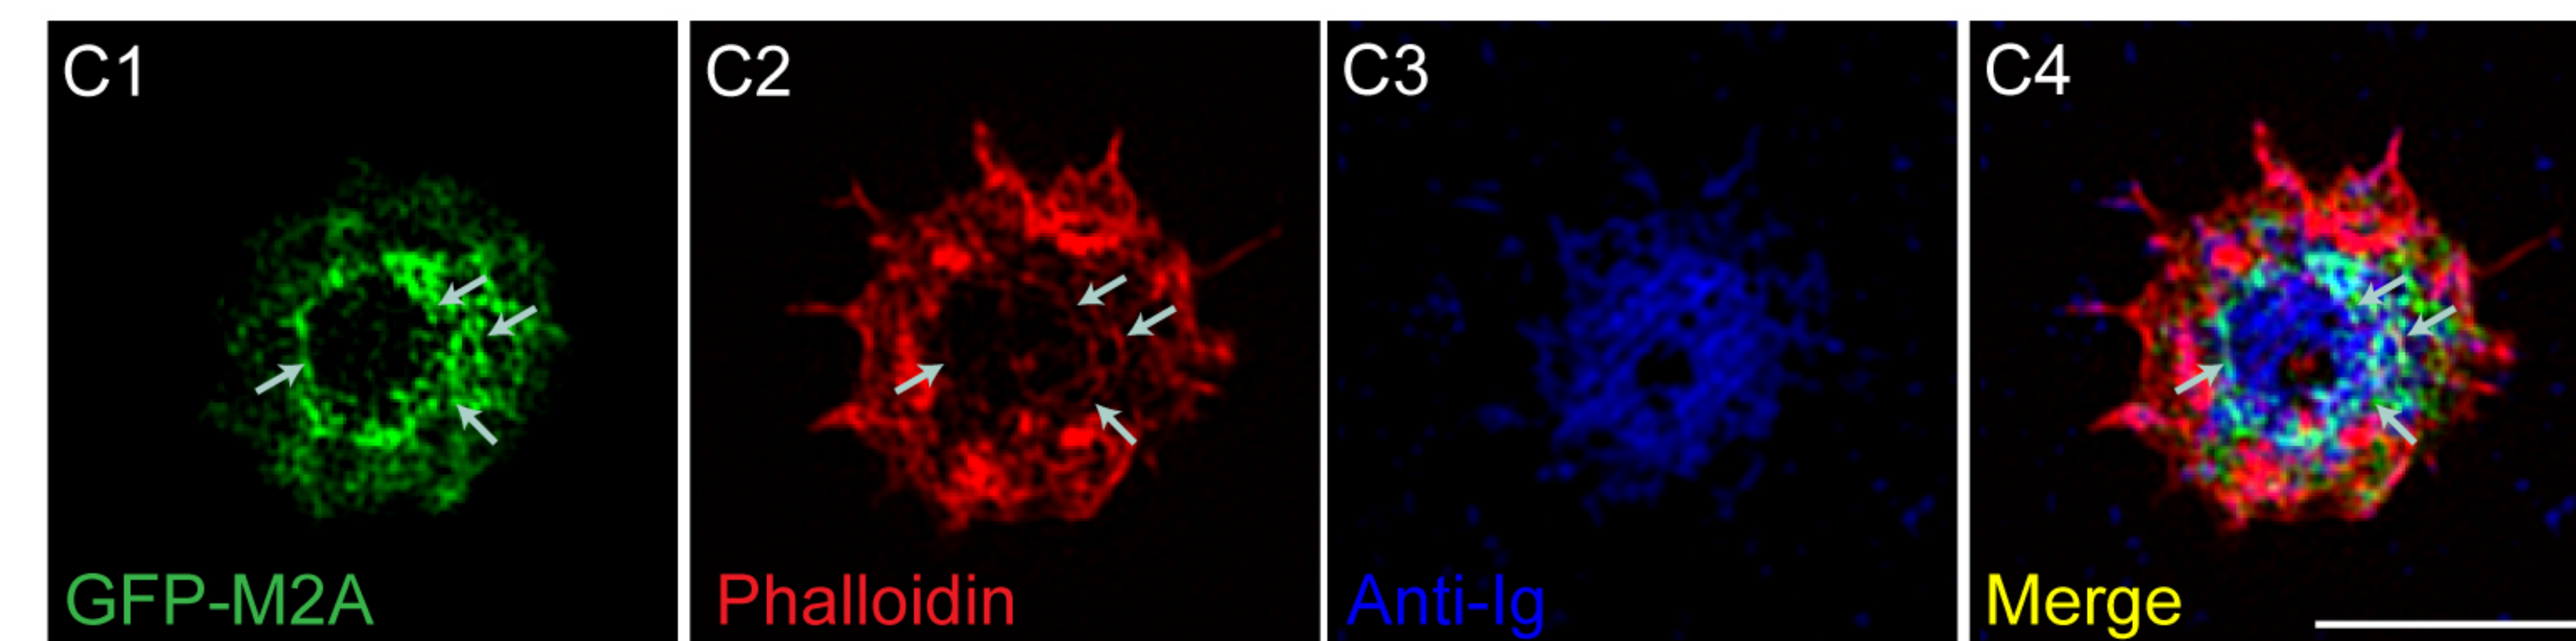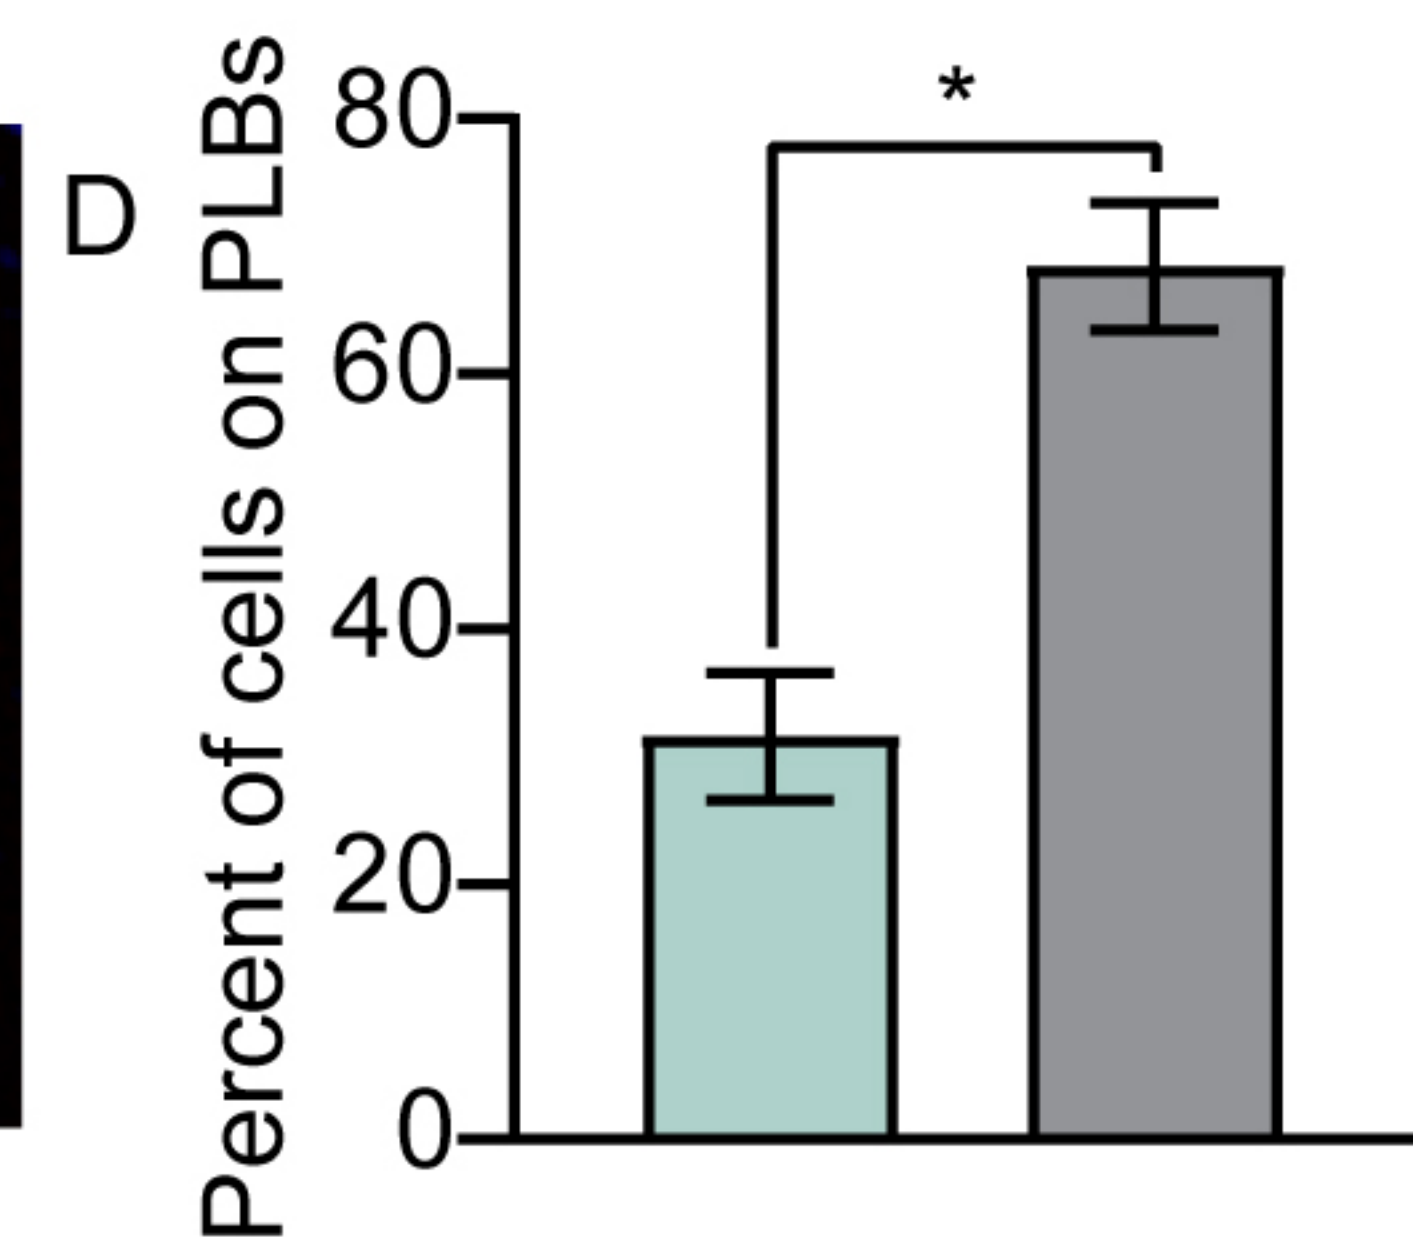

Peripheral clusters

Microclusters

Centralized clusters

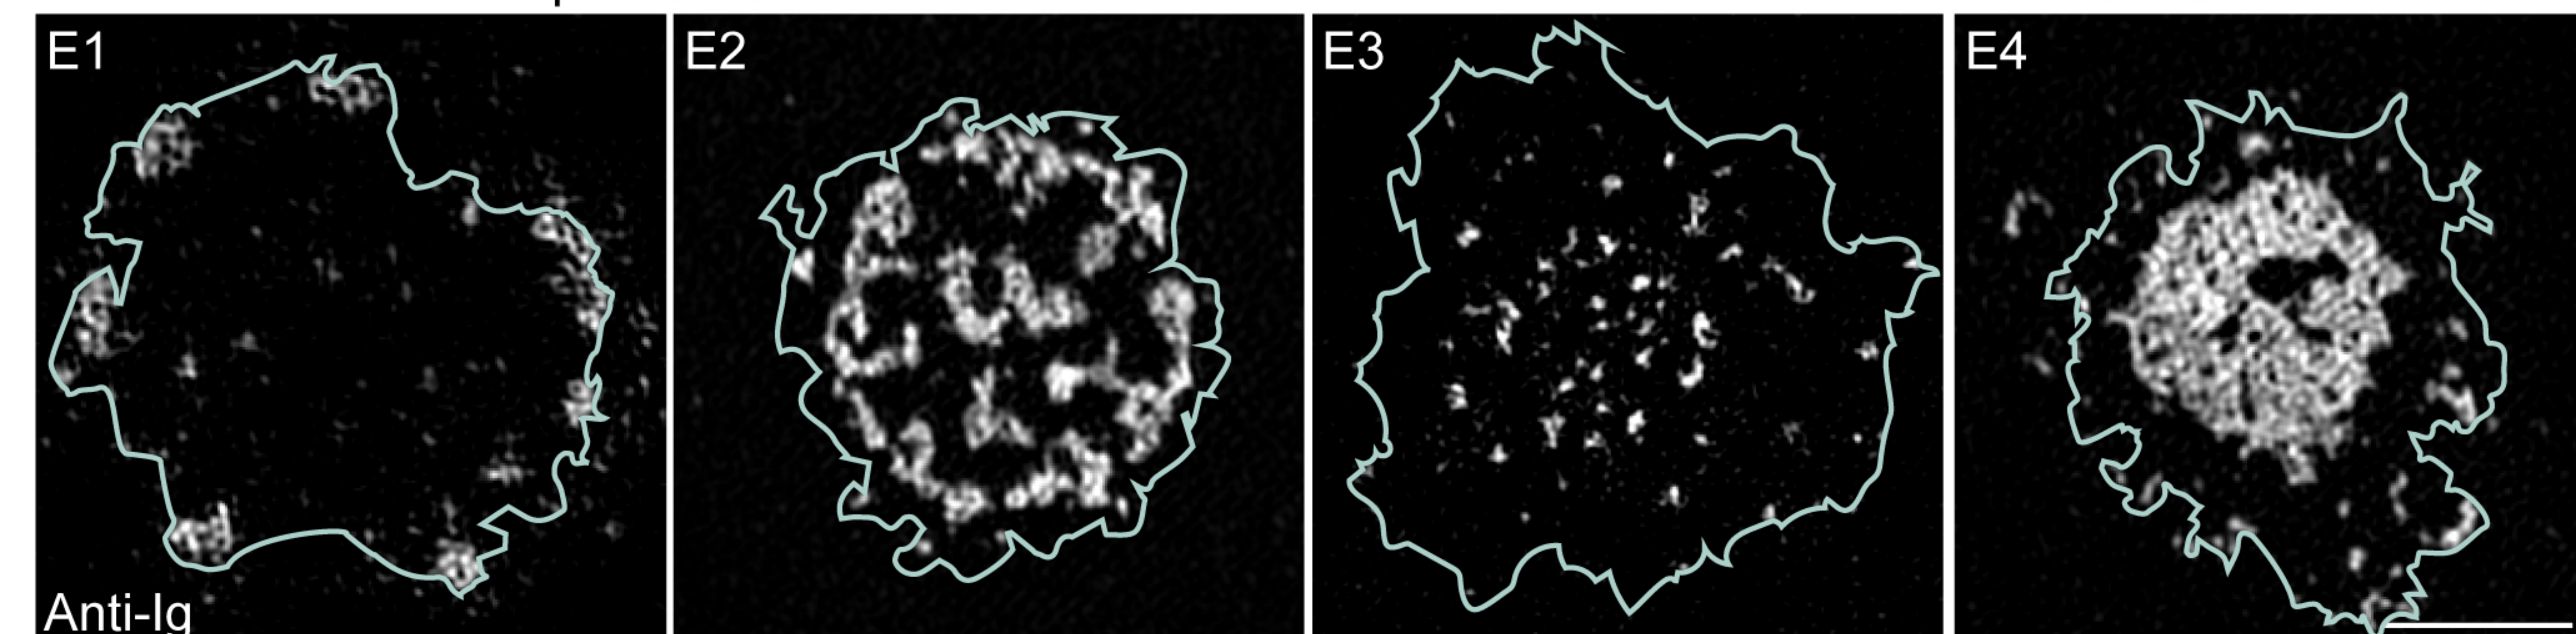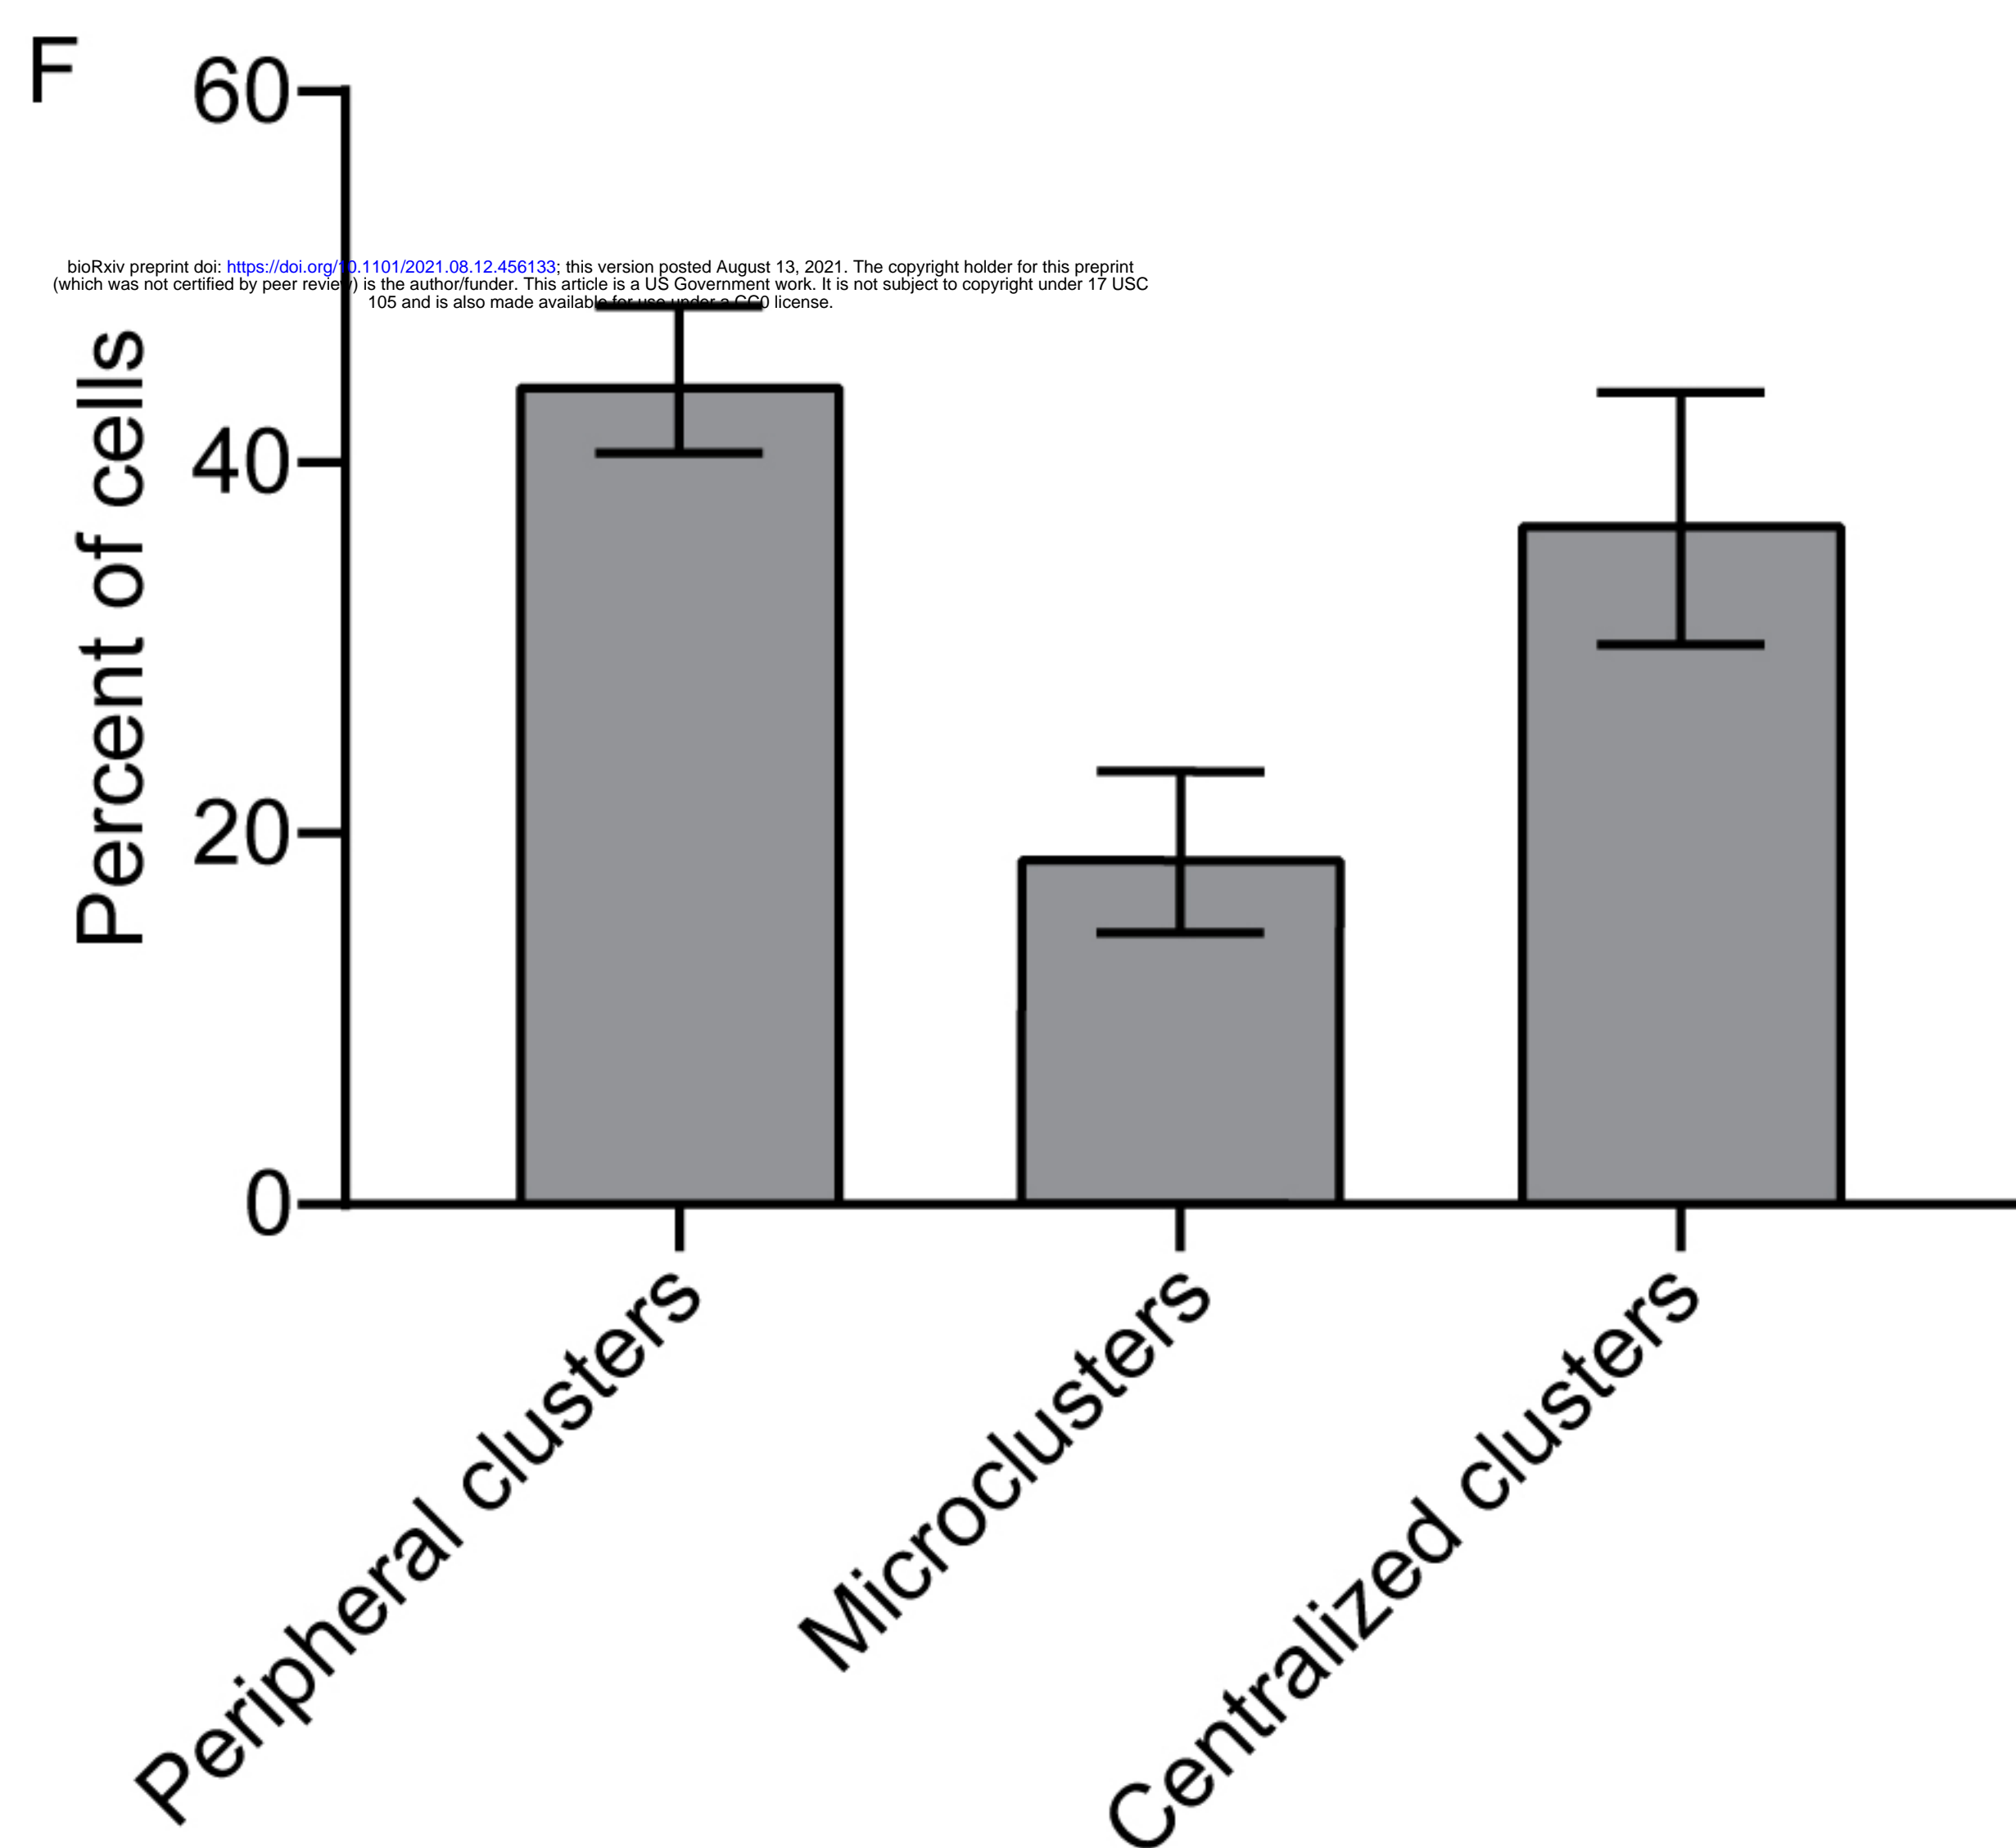

Source: https://www.biorxiv.org/content/biorxiv/early/2021/08/13/2021.08.12.456133.full.pdf
